# Supplementary material for: In situ measurement of pH in liquid chromatography systems using a colorimetric approach
Source: Royal Society of Chemistry journal article supplement (doi:10.1039/c8ay02496k), 2018-12-19
Supplement: c8ay02496k1.xlsx [file c8ay02496k1.xlsx]

## Sheet: Hue vs pH Graph
	Absorbance (mAU)
Time (min)	640 nm	520 nm	452 nm	Min	Max	Range	H red	H green	H blue	H	H mod	pH
10	0.623174	78.5712	40.2913	0.623174	78.5712	77.948	0	0.418151	0	0.418151	0.418151	2.4
12	0.696659	74.8492	41.3941	0.696659	74.8492	74.1525	0	0.424806	0	0.424806	0.424806	2.6
17	0.901878	70.7225	43.3015	0.901878	70.7225	69.8206	0	0.434544	0	0.434544	0.434544	2.8
22	1.07968	64.0883	46.0196	1.07968	64.0883	63.0086	0	0.452206	0	0.452206	0.452206	3
27	1.23657	54.4934	50.3745	1.23657	54.4934	53.2568	0	0.48711	0	0.48711	0.48711	3.2
32	1.46343	32.9819	56.5909	1.46343	56.5909	55.1274	0	0	0.571377	0.571377	0.571377	3.4
37	1.76774	20.2838	59.6435	1.76774	59.6435	57.8757	0	0	0.613345	0.613345	0.613345	3.6
42	2.10164	17.2106	60.708	2.10164	60.708	58.6063	0	0	0.623699	0.623699	0.623699	3.8
47	2.34299	16.0905	60.9916	2.34299	60.9916	58.6486	0	0	0.627599	0.627599	0.627599	4
52	2.55542	15.6753	61.2567	2.55542	61.2567	58.7013	0	0	0.629416	0.629416	0.629416	4.2
57	2.78097	15.4673	61.5908	2.78097	61.5908	58.8098	0	0	0.630714	0.630714	0.630714	4.4
62	2.99047	15.3294	61.7309	2.99047	61.7309	58.7405	0	0	0.631657	0.631657	0.631657	4.6
67	3.14236	15.3593	62.0456	3.14236	62.0456	58.9032	0	0	0.632099	0.632099	0.632099	4.8
72	3.30459	15.2831	62.3767	3.30459	62.3767	59.0721	0	0	0.63287	0.63287	0.63287	5
77	3.51069	14.931	61.5472	3.51069	61.5472	58.0366	0	0	0.63387	0.63387	0.63387	5.2
82	3.76684	14.9158	62.3129	3.76684	62.3129	58.5461	0	0	0.634928	0.634928	0.634928	5.4
87	4.06088	14.6569	62.5119	4.06088	62.5119	58.4511	0	0	0.636453	0.636453	0.636453	5.6
92	4.37076	14.3107	62.3011	4.37076	62.3011	57.9303	0	0	0.638069	0.638069	0.638069	5.8
97	4.89656	14.0729	62.935	4.89656	62.935	58.0384	0	0	0.640315	0.640315	0.640315	6
102	5.59767	13.9414	63.0671	5.59767	63.0671	57.4694	0	0	0.642469	0.642469	0.642469	6.2
107	6.60668	13.8961	63.0659	6.60668	63.0659	56.4592	0	0	0.645148	0.645148	0.645148	6.4
112	7.96991	14.0392	62.8436	7.96991	62.8436	54.8737	0	0	0.648233	0.648233	0.648233	6.6
117	9.6252	14.2815	62.3065	9.6252	62.3065	52.6813	0	0	0.651935	0.651935	0.651935	6.8
122	11.8256	14.8062	61.9465	11.8256	61.9465	50.1209	0	0	0.656755	0.656755	0.656755	7
127	13.9576	15.2887	60.9555	13.9576	60.9555	46.998	0	0	0.661946	0.661946	0.661946	7.2
132	15.9246	15.6626	59.1223	15.6626	59.1223	43.4598	0	0	0.667671	0.667671	0.667671	7.4
137	17.8251	16.1927	58.3345	16.1927	58.3345	42.1419	0	0	0.673123	0.673123	0.673123	7.6
142	19.4173	16.7713	57.5198	16.7713	57.5198	40.7486	0	0	0.677489	0.677489	0.677489	7.8
147	20.993	17.5034	57.0867	17.5034	57.0867	39.5833	0	0	0.68136	0.68136	0.68136	8
152	22.3589	18.2363	56.2007	18.2363	56.2007	37.9644	0	0	0.684765	0.684765	0.684765	8.2
157	23.8191	19.2111	55.4891	19.2111	55.4891	36.278	0	0	0.687836	0.687836	0.687836	8.4
162	25.2042	20.2714	54.9462	20.2714	54.9462	34.6748	0	0	0.690376	0.690376	0.690376	8.6
167	26.5843	21.4798	53.8646	21.4798	53.8646	32.3848	0	0	0.692937	0.692937	0.692937	8.8
172	27.2106	22.0855	53.6896	22.0855	53.6896	31.6041	0	0	0.693694	0.693694	0.693694	9
177	27.956	22.8427	53.3469	22.8427	53.3469	30.5042	0	0	0.694604	0.694604	0.694604	9.2
182	28.5176	23.4936	52.8414	23.4936	52.8414	29.3478	0	0	0.695198	0.695198	0.695198	9.4
187	29.1336	24.1762	52.9414	24.1762	52.9414	28.7652	0	0	0.69539	0.69539	0.69539	9.6
192	29.5089	24.6356	52.6813	24.6356	52.6813	28.0457	0	0	0.695627	0.695627	0.695627	9.8
197	30.0929	25.4432	52.2376	25.4432	52.2376	26.7944	0	0	0.695589	0.695589	0.695589	10
202	30.7625	26.2989	52.1077	26.2989	52.1077	25.8088	0	0	0.695491	0.695491	0.695491	10.2
207	31.3925	27.3142	51.5897	27.3142	51.5897	24.2755	0	0	0.694667	0.694667	0.694667	10.4

## Sheet: Hue vs pH Tabulated
Raw Data		Interpolated
Hue	pH	Hue	pH
0.418151	2.4	0.418151	2.4
0.424806	2.6	0.418816	2.42		"Raw Data" refers to the data acquired in the hue vs pH calibration.
0.434544	2.8	0.419482	2.44
0.452206	3	0.420147	2.46		"Interpolated Data"refers to the same data, interpolated using Matlab in order to have more data points in the curve. The Hue-pH calculator uses this table.
0.48711	3.2	0.420813	2.48
0.571377	3.4	0.421478	2.5
0.613345	3.6	0.422144	2.52
0.623699	3.8	0.422809	2.54
0.627599	4	0.423475	2.56
0.629416	4.2	0.42414	2.58
0.630714	4.4	0.424806	2.6
0.631657	4.6	0.42578	2.62
0.632099	4.8	0.426753	2.64
0.63287	5	0.427727	2.66
0.63387	5.2	0.428701	2.68
0.634928	5.4	0.429675	2.7
0.636453	5.6	0.430649	2.72
0.638069	5.8	0.431623	2.74
0.640315	6	0.432597	2.76
0.642469	6.2	0.43357	2.78
0.645148	6.4	0.434544	2.8
0.648233	6.6	0.43631	2.82
0.651935	6.8	0.438077	2.84
0.656755	7	0.439843	2.86
0.661946	7.2	0.441609	2.88
0.667671	7.4	0.443375	2.9
0.673123	7.6	0.445141	2.92
0.677489	7.8	0.446907	2.94
0.68136	8	0.448673	2.96
0.684765	8.2	0.45044	2.98
0.687836	8.4	0.452206	3
0.690376	8.6	0.455696	3.02
0.692937	8.8	0.459187	3.04
0.693694	9	0.462677	3.06
0.694604	9.2	0.466167	3.08
0.695198	9.4	0.469658	3.1
0.69539	9.6	0.473148	3.12
0.695627	9.8	0.476639	3.14
0.695589	10	0.480129	3.16
0.695491	10.2	0.48362	3.18
0.694667	10.4	0.48711	3.2
		0.495537	3.22
		0.503963	3.24
		0.51239	3.26
		0.520817	3.28
		0.529244	3.3
		0.53767	3.32
		0.546097	3.34
		0.554524	3.36
		0.56295	3.38
		0.571377	3.4
		0.575574	3.42
		0.579771	3.44
		0.583967	3.46
		0.588164	3.48
		0.592361	3.5
		0.596558	3.52
		0.600755	3.54
		0.604952	3.56
		0.609148	3.58
		0.613345	3.6
		0.614381	3.62
		0.615416	3.64
		0.616451	3.66
		0.617487	3.68
		0.618522	3.7
		0.619558	3.72
		0.620593	3.74
		0.621628	3.76
		0.622664	3.78
		0.623699	3.8
		0.624089	3.82
		0.624479	3.84
		0.624869	3.86
		0.625259	3.88
		0.625649	3.9
		0.626039	3.92
		0.626429	3.94
		0.626819	3.96
		0.627209	3.98
		0.627599	4
		0.627781	4.02
		0.627963	4.04
		0.628144	4.06
		0.628326	4.08
		0.628508	4.1
		0.628689	4.12
		0.628871	4.14
		0.629053	4.16
		0.629235	4.18
		0.629416	4.2
		0.629546	4.22
		0.629676	4.24
		0.629806	4.26
		0.629935	4.28
		0.630065	4.3
		0.630195	4.32
		0.630324	4.34
		0.630454	4.36
		0.630584	4.38
		0.630714	4.4
		0.630808	4.42
		0.630902	4.44
		0.630997	4.46
		0.631091	4.48
		0.631185	4.5
		0.63128	4.52
		0.631374	4.54
		0.631468	4.56
		0.631563	4.58
		0.631657	4.6
		0.631701	4.62
		0.631745	4.64
		0.631789	4.66
		0.631834	4.68
		0.631878	4.7
		0.631922	4.72
		0.631966	4.74
		0.63201	4.76
		0.632055	4.78
		0.632099	4.8
		0.632176	4.82
		0.632253	4.84
		0.63233	4.86
		0.632407	4.88
		0.632485	4.9
		0.632562	4.92
		0.632639	4.94
		0.632716	4.96
		0.632793	4.98
		0.63287	5
		0.63297	5.02
		0.63307	5.04
		0.63317	5.06
		0.63327	5.08
		0.63337	5.1
		0.63347	5.12
		0.63357	5.14
		0.63367	5.16
		0.63377	5.18
		0.63387	5.2
		0.633976	5.22
		0.634082	5.24
		0.634188	5.26
		0.634294	5.28
		0.634399	5.3
		0.634505	5.32
		0.634611	5.34
		0.634717	5.36
		0.634822	5.38
		0.634928	5.4
		0.635081	5.42
		0.635233	5.44
		0.635386	5.46
		0.635538	5.48
		0.635691	5.5
		0.635843	5.52
		0.635996	5.54
		0.636148	5.56
		0.636301	5.58
		0.636453	5.6
		0.636615	5.62
		0.636776	5.64
		0.636938	5.66
		0.6371	5.68
		0.637261	5.7
		0.637423	5.72
		0.637584	5.74
		0.637746	5.76
		0.637908	5.78
		0.638069	5.8
		0.638294	5.82
		0.638518	5.84
		0.638743	5.86
		0.638968	5.88
		0.639192	5.9
		0.639417	5.92
		0.639641	5.94
		0.639866	5.96
		0.640091	5.98
		0.640315	6
		0.640531	6.02
		0.640746	6.04
		0.640961	6.06
		0.641177	6.08
		0.641392	6.1
		0.641608	6.12
		0.641823	6.14
		0.642038	6.16
		0.642254	6.18
		0.642469	6.2
		0.642737	6.22
		0.643005	6.24
		0.643273	6.26
		0.643541	6.28
		0.643809	6.3
		0.644077	6.32
		0.644345	6.34
		0.644613	6.36
		0.64488	6.38
		0.645148	6.4
		0.645457	6.42
		0.645765	6.44
		0.646074	6.46
		0.646382	6.48
		0.646691	6.5
		0.646999	6.52
		0.647307	6.54
		0.647616	6.56
		0.647924	6.58
		0.648233	6.6
		0.648603	6.62
		0.648973	6.64
		0.649344	6.66
		0.649714	6.68
		0.650084	6.7
		0.650454	6.72
		0.650825	6.74
		0.651195	6.76
		0.651565	6.78
		0.651935	6.8
		0.652417	6.82
		0.652899	6.84
		0.653381	6.86
		0.653863	6.88
		0.654345	6.9
		0.654827	6.92
		0.655309	6.94
		0.655791	6.96
		0.656273	6.98
		0.656755	7
		0.657274	7.02
		0.657793	7.04
		0.658313	7.06
		0.658832	7.08
		0.659351	7.1
		0.65987	7.12
		0.660389	7.14
		0.660908	7.16
		0.661427	7.18
		0.661946	7.2
		0.662519	7.22
		0.663091	7.24
		0.663664	7.26
		0.664236	7.28
		0.664809	7.3
		0.665381	7.32
		0.665954	7.34
		0.666526	7.36
		0.667099	7.38
		0.667671	7.4
		0.668217	7.42
		0.668762	7.44
		0.669307	7.46
		0.669852	7.48
		0.670397	7.5
		0.670942	7.52
		0.671487	7.54
		0.672033	7.56
		0.672578	7.58
		0.673123	7.6
		0.673559	7.62
		0.673996	7.64
		0.674433	7.66
		0.674869	7.68
		0.675306	7.7
		0.675743	7.72
		0.676179	7.74
		0.676616	7.76
		0.677053	7.78
		0.677489	7.8
		0.677876	7.82
		0.678263	7.84
		0.67865	7.86
		0.679037	7.88
		0.679424	7.9
		0.679811	7.92
		0.680199	7.94
		0.680586	7.96
		0.680973	7.98
		0.68136	8
		0.6817	8.02
		0.682041	8.04
		0.682381	8.06
		0.682722	8.08
		0.683062	8.1
		0.683403	8.12
		0.683743	8.14
		0.684084	8.16
		0.684424	8.18
		0.684765	8.2
		0.685072	8.22
		0.685379	8.24
		0.685686	8.26
		0.685994	8.28
		0.686301	8.3
		0.686608	8.32
		0.686915	8.34
		0.687222	8.36
		0.687529	8.38
		0.687836	8.4
		0.68809	8.42
		0.688344	8.44
		0.688598	8.46
		0.688852	8.48
		0.689106	8.5
		0.68936	8.52
		0.689614	8.54
		0.689868	8.56
		0.690122	8.58
		0.690376	8.6
		0.690633	8.62
		0.690889	8.64
		0.691145	8.66
		0.691401	8.68
		0.691657	8.7
		0.691913	8.72
		0.692169	8.74
		0.692425	8.76
		0.692681	8.78
		0.692937	8.8
		0.693013	8.82
		0.693088	8.84
		0.693164	8.86
		0.69324	8.88
		0.693316	8.9
		0.693391	8.92
		0.693467	8.94
		0.693543	8.96
		0.693618	8.98
		0.693694	9
		0.693785	9.02
		0.693876	9.04
		0.693967	9.06
		0.694058	9.08
		0.694149	9.1
		0.69424	9.12
		0.694331	9.14
		0.694422	9.16
		0.694513	9.18
		0.694604	9.2
		0.694664	9.22
		0.694723	9.24
		0.694783	9.26
		0.694842	9.28
		0.694901	9.3
		0.694961	9.32
		0.69502	9.34
		0.695079	9.36
		0.695139	9.38
		0.695198	9.4
		0.695217	9.42
		0.695236	9.44
		0.695256	9.46
		0.695275	9.48
		0.695294	9.5
		0.695313	9.52
		0.695332	9.54
		0.695351	9.56
		0.695371	9.58
		0.69539	9.6
		0.695414	9.62
		0.695437	9.64
		0.695461	9.66
		0.695485	9.68
		0.695508	9.7
		0.695532	9.72
		0.695556	9.74
		0.69558	9.76
		0.695603	9.78
		0.695627	9.8
		0.695623	9.82
		0.695619	9.84
		0.695616	9.86
		0.695612	9.88
		0.695608	9.9
		0.695604	9.92
		0.6956	9.94
		0.695596	9.96
		0.695593	9.98
		0.695589	10
		0.695579	10.02
		0.695569	10.04
		0.69556	10.06
		0.69555	10.08
		0.69554	10.1
		0.69553	10.12
		0.695521	10.14
		0.695511	10.16
		0.695501	10.18
		0.695491	10.2
		0.695409	10.22
		0.695326	10.24
		0.695244	10.26
		0.695162	10.28
		0.695079	10.3
		0.694997	10.32
		0.694914	10.34
		0.694832	10.36
		0.694749	10.38
		0.694667	10.4

## Sheet: Ex. (4.6x90mm), 120uL loops
Waters BEH SEC (4.6 x 90mm, 1.7 μm ), 120 μL loops
	Absorbance (mAU)
Time	640 nm	520 nm	452 nm	Min	Max	Range	H red	H green	H blue	H	H mod	pH
2	-20.1021	-18.3783	22.1326	-20.1021	22.1326	42.2347	0	0	0.659864	0.659864	0.659864	7.1
2.00042	-20.1062	-18.362	22.1417	-20.1062	22.1417	42.2479	0	0	0.659786	0.659786	0.659786	7.1
2.00083	-20.1319	-18.3405	22.1498	-20.1319	22.1498	42.2817	0	0	0.659605	0.659605	0.659605	7.1
2.00125	-20.1686	-18.323	22.1536	-20.1686	22.1536	42.3222	0	0	0.659399	0.659399	0.659399	7.1
2.00167	-20.2013	-18.3164	22.1536	-20.2013	22.1536	42.3548	0	0	0.65925	0.65925	0.65925	7.08
2.00208	-20.2226	-18.321	22.1522	-20.2226	22.1522	42.3748	0	0	0.659187	0.659187	0.659187	7.08
2.0025	-20.2367	-18.3342	22.1503	-20.2367	22.1503	42.387	0	0	0.659186	0.659186	0.659186	7.08
2.00292	-20.2489	-18.3466	22.1472	-20.2489	22.1472	42.3961	0	0	0.659189	0.659189	0.659189	7.08
2.00333	-20.246	-18.3496	22.1439	-20.246	22.1439	42.3899	0	0	0.659211	0.659211	0.659211	7.08
2.00375	-20.2193	-18.3392	22.1439	-20.2193	22.1439	42.3632	0	0	0.65927	0.65927	0.65927	7.08
2.00417	-20.1833	-18.3181	22.1475	-20.1833	22.1475	42.3308	0	0	0.659323	0.659323	0.659323	7.08
2.00458	-20.158	-18.2911	22.1511	-20.158	22.1511	42.3091	0	0	0.659312	0.659312	0.659312	7.08
2.005	-20.1414	-18.2646	22.1536	-20.1414	22.1536	42.2949	0	0	0.659271	0.659271	0.659271	7.08
2.00542	-20.1128	-18.2434	22.1594	-20.1128	22.1594	42.2722	0	0	0.659297	0.659297	0.659297	7.08
2.00583	-20.0799	-18.2291	22.1722	-20.0799	22.1722	42.2521	0	0	0.659366	0.659366	0.659366	7.1
2.00625	-20.0699	-18.2239	22.188	-20.0699	22.188	42.2579	0	0	0.659386	0.659386	0.659386	7.1
2.00667	-20.0904	-18.232	22.2045	-20.0904	22.2045	42.2949	0	0	0.659343	0.659343	0.659343	7.08
2.00708	-20.1244	-18.2577	22.2264	-20.1244	22.2264	42.3508	0	0	0.65932	0.65932	0.65932	7.08
2.0075	-20.1611	-18.2963	22.2569	-20.1611	22.2569	42.418	0	0	0.65934	0.65934	0.65934	7.08
2.00792	-20.205	-18.3411	22.2947	-20.205	22.2947	42.4996	0	0	0.659358	0.659358	0.659358	7.1
2.00833	-20.2503	-18.3945	22.3365	-20.2503	22.3365	42.5868	0	0	0.659404	0.659404	0.659404	7.1
2.00875	-20.2882	-18.4597	22.3829	-20.2882	22.3829	42.6711	0	0	0.659525	0.659525	0.659525	7.1
2.00917	-20.3229	-18.5297	22.4346	-20.3229	22.4346	42.7575	0	0	0.659677	0.659677	0.659677	7.1
2.00958	-20.3654	-18.589	22.4889	-20.3654	22.4889	42.8544	0	0	0.659758	0.659758	0.659758	7.1
2.01	-20.4136	-18.6322	22.5396	-20.4136	22.5396	42.9533	0	0	0.659754	0.659754	0.659754	7.1
2.01042	-20.4533	-18.6686	22.5783	-20.4533	22.5783	43.0316	0	0	0.659754	0.659754	0.659754	7.1
2.01083	-20.4845	-18.7022	22.6019	-20.4845	22.6019	43.0863	0	0	0.659773	0.659773	0.659773	7.1
2.01125	-20.513	-18.7253	22.6147	-20.513	22.6147	43.1277	0	0	0.659758	0.659758	0.659758	7.1
2.01167	-20.5331	-18.7328	22.6231	-20.5331	22.6231	43.1562	0	0	0.659714	0.659714	0.659714	7.1
2.01208	-20.5407	-18.7314	22.6297	-20.5407	22.6297	43.1704	0	0	0.659682	0.659682	0.659682	7.1
2.0125	-20.5403	-18.7277	22.6404	-20.5403	22.6404	43.1807	0	0	0.659671	0.659671	0.659671	7.1
2.01292	-20.5481	-18.7276	22.6693	-20.5481	22.6693	43.2175	0	0	0.659646	0.659646	0.659646	7.1
2.01333	-20.5701	-18.7409	22.7268	-20.5701	22.7268	43.2969	0	0	0.659625	0.659625	0.659625	7.1
2.01375	-20.6046	-18.7788	22.8095	-20.6046	22.8095	43.4141	0	0	0.659657	0.659657	0.659657	7.1
2.01417	-20.6543	-18.844	22.9071	-20.6543	22.9071	43.5613	0	0	0.659741	0.659741	0.659741	7.1
2.01458	-20.7213	-18.9285	23.0166	-20.7213	23.0166	43.7379	0	0	0.659835	0.659835	0.659835	7.1
2.015	-20.8092	-19.029	23.1402	-20.8092	23.1402	43.9494	0	0	0.659916	0.659916	0.659916	7.12
2.01542	-20.9124	-19.138	23.2727	-20.9124	23.2727	44.1851	0	0	0.659974	0.659974	0.659974	7.12
2.01583	-21.0217	-19.2424	23.403	-21.0217	23.403	44.4247	0	0	0.659991	0.659991	0.659991	7.12
2.01625	-21.1272	-19.3311	23.5254	-21.1272	23.5254	44.6525	0	0	0.659963	0.659963	0.659963	7.12
2.01667	-21.2285	-19.4059	23.6422	-21.2285	23.6422	44.8707	0	0	0.659897	0.659897	0.659897	7.12
2.01708	-21.3333	-19.4787	23.7526	-21.3333	23.7526	45.0859	0	0	0.659811	0.659811	0.659811	7.1
2.0175	-21.4424	-19.5547	23.8462	-21.4424	23.8462	45.2886	0	0	0.65972	0.65972	0.65972	7.1
2.01792	-21.5449	-19.6334	23.9158	-21.5449	23.9158	45.4607	0	0	0.659659	0.659659	0.659659	7.1
2.01833	-21.6269	-19.7061	23.9661	-21.6269	23.9661	45.593	0	0	0.659645	0.659645	0.659645	7.1
2.01875	-21.6848	-19.764	24.0061	-21.6848	24.0061	45.6908	0	0	0.65966	0.65966	0.65966	7.1
2.01917	-21.7209	-19.8036	24.0355	-21.7209	24.0355	45.7564	0	0	0.659683	0.659683	0.659683	7.1
2.01958	-21.742	-19.8285	24.0512	-21.742	24.0512	45.7932	0	0	0.659703	0.659703	0.659703	7.1
2.02	-21.7594	-19.8425	24.0575	-21.7594	24.0575	45.8169	0	0	0.659694	0.659694	0.659694	7.1
2.02042	-21.7848	-19.8424	24.0591	-21.7848	24.0591	45.8439	0	0	0.659605	0.659605	0.659605	7.1
2.02083	-21.8156	-19.8324	24.0549	-21.8156	24.0549	45.8705	0	0	0.659461	0.659461	0.659461	7.1
2.02125	-21.8422	-19.8219	24.0431	-21.8422	24.0431	45.8853	0	0	0.659329	0.659329	0.659329	7.08
2.02167	-21.8601	-19.8121	24.0258	-21.8601	24.0258	45.8859	0	0	0.659228	0.659228	0.659228	7.08
2.02208	-21.8609	-19.7979	24.0048	-21.8609	24.0048	45.8657	0	0	0.65917	0.65917	0.65917	7.08
2.0225	-21.8295	-19.7761	23.9795	-21.8295	23.9795	45.809	0	0	0.659196	0.659196	0.659196	7.08
2.02292	-21.7621	-19.751	23.9534	-21.7621	23.9534	45.7155	0	0	0.659335	0.659335	0.659335	7.08
2.02333	-21.6802	-19.7244	23.9315	-21.6802	23.9315	45.6117	0	0	0.65952	0.65952	0.65952	7.1
2.02375	-21.6108	-19.697	23.9111	-21.6108	23.9111	45.5219	0	0	0.65966	0.65966	0.65966	7.1
2.02417	-21.5578	-19.6716	23.8871	-21.5578	23.8871	45.445	0	0	0.659749	0.659749	0.659749	7.1
2.02458	-21.5108	-19.643	23.8602	-21.5108	23.8602	45.371	0	0	0.659806	0.659806	0.659806	7.1
2.025	-21.4633	-19.6089	23.8345	-21.4633	23.8345	45.2978	0	0	0.659843	0.659843	0.659843	7.1
2.02542	-21.415	-19.5753	23.808	-21.415	23.808	45.223	0	0	0.659887	0.659887	0.659887	7.12
2.02583	-21.3705	-19.5491	23.7732	-21.3705	23.7732	45.1438	0	0	0.659942	0.659942	0.659942	7.12
2.02625	-21.3329	-19.5288	23.7311	-21.3329	23.7311	45.064	0	0	0.659994	0.659994	0.659994	7.12
2.02667	-21.3045	-19.5091	23.6931	-21.3045	23.6931	44.9975	0	0	0.660017	0.660017	0.660017	7.12
2.02708	-21.2781	-19.4902	23.6663	-21.2781	23.6663	44.9444	0	0	0.660037	0.660037	0.660037	7.12
2.0275	-21.2477	-19.4685	23.6429	-21.2477	23.6429	44.8906	0	0	0.660061	0.660061	0.660061	7.12
2.02792	-21.227	-19.4395	23.6134	-21.227	23.6134	44.8404	0	0	0.660023	0.660023	0.660023	7.12
2.02833	-21.2255	-19.4068	23.5804	-21.2255	23.5804	44.8059	0	0	0.659902	0.659902	0.659902	7.12
2.02875	-21.2333	-19.3755	23.5495	-21.2333	23.5495	44.7828	0	0	0.659752	0.659752	0.659752	7.1
2.02917	-21.2266	-19.3461	23.5179	-21.2266	23.5179	44.7445	0	0	0.659662	0.659662	0.659662	7.1
2.02958	-21.2053	-19.3178	23.4805	-21.2053	23.4805	44.6858	0	0	0.659627	0.659627	0.659627	7.1
2.03	-21.1889	-19.2941	23.4417	-21.1889	23.4417	44.6306	0	0	0.659591	0.659591	0.659591	7.1
2.03042	-21.1715	-19.275	23.4082	-21.1715	23.4082	44.5797	0	0	0.659576	0.659576	0.659576	7.1
2.03083	-21.1406	-19.2492	23.3802	-21.1406	23.3802	44.5208	0	0	0.659586	0.659586	0.659586	7.1
2.03125	-21.0986	-19.2093	23.3534	-21.0986	23.3534	44.452	0	0	0.659583	0.659583	0.659583	7.1
2.03167	-21.0592	-19.1621	23.3259	-21.0592	23.3259	44.3852	0	0	0.659543	0.659543	0.659543	7.1
2.03208	-21.0261	-19.1206	23.2993	-21.0261	23.2993	44.3253	0	0	0.659502	0.659502	0.659502	7.1
2.0325	-20.9915	-19.0902	23.2746	-20.9915	23.2746	44.266	0	0	0.659508	0.659508	0.659508	7.1
2.03292	-20.9597	-19.0681	23.2522	-20.9597	23.2522	44.2119	0	0	0.659536	0.659536	0.659536	7.1
2.03333	-20.9296	-19.0546	23.2301	-20.9296	23.2301	44.1598	0	0	0.65959	0.65959	0.65959	7.1
2.03375	-20.8934	-19.0518	23.2065	-20.8934	23.2065	44.0999	0	0	0.659707	0.659707	0.659707	7.1
2.03417	-20.8579	-19.0567	23.1807	-20.8579	23.1807	44.0386	0	0	0.65985	0.65985	0.65985	7.1
2.03458	-20.8394	-19.0631	23.1518	-20.8394	23.1518	43.9912	0	0	0.659937	0.659937	0.659937	7.12
2.035	-20.8382	-19.0657	23.1222	-20.8382	23.1222	43.9604	0	0	0.659947	0.659947	0.659947	7.12
2.03542	-20.8377	-19.059	23.095	-20.8377	23.095	43.9328	0	0	0.659919	0.659919	0.659919	7.12
2.03583	-20.8327	-19.04	23.0733	-20.8327	23.0733	43.906	0	0	0.659862	0.659862	0.659862	7.1
2.03625	-20.8334	-19.0128	23.0586	-20.8334	23.0586	43.892	0	0	0.659754	0.659754	0.659754	7.1
2.03667	-20.8427	-18.9844	23.0501	-20.8427	23.0501	43.8928	0	0	0.659611	0.659611	0.659611	7.1
2.03708	-20.846	-18.9556	23.0461	-20.846	23.0461	43.8921	0	0	0.659489	0.659489	0.659489	7.1
2.0375	-20.8363	-18.9267	23.0425	-20.8363	23.0425	43.8788	0	0	0.659413	0.659413	0.659413	7.1
2.03792	-20.8244	-18.9013	23.036	-20.8244	23.036	43.8604	0	0	0.659359	0.659359	0.659359	7.1
2.03833	-20.8187	-18.8833	23.0252	-20.8187	23.0252	43.8439	0	0	0.659309	0.659309	0.659309	7.08
2.03875	-20.8194	-18.8703	23.0089	-20.8194	23.0089	43.8283	0	0	0.659255	0.659255	0.659255	7.08
2.03917	-20.8212	-18.8594	22.9885	-20.8212	22.9885	43.8097	0	0	0.659204	0.659204	0.659204	7.08
2.03958	-20.8253	-18.8534	22.9673	-20.8253	22.9673	43.7926	0	0	0.659162	0.659162	0.659162	7.08
2.04	-20.8262	-18.8511	22.947	-20.8262	22.947	43.7732	0	0	0.659146	0.659146	0.659146	7.08
2.04042	-20.8137	-18.8483	22.9297	-20.8137	22.9297	43.7434	0	0	0.659178	0.659178	0.659178	7.08
2.04083	-20.7956	-18.8405	22.9178	-20.7956	22.9178	43.7134	0	0	0.659213	0.659213	0.659213	7.08
2.04125	-20.7868	-18.8298	22.9123	-20.7868	22.9123	43.6991	0	0	0.659203	0.659203	0.659203	7.08
2.04167	-20.7866	-18.8227	22.9109	-20.7866	22.9109	43.6976	0	0	0.659176	0.659176	0.659176	7.08
2.04208	-20.7749	-18.8201	22.9124	-20.7749	22.9124	43.6874	0	0	0.659209	0.659209	0.659209	7.08
2.0425	-20.7486	-18.8207	22.9206	-20.7486	22.9206	43.6692	0	0	0.659309	0.659309	0.659309	7.08
2.04292	-20.7283	-18.8257	22.9361	-20.7283	22.9361	43.6644	0	0	0.659404	0.659404	0.659404	7.1
2.04333	-20.7248	-18.8376	22.9539	-20.7248	22.9539	43.6787	0	0	0.659465	0.659465	0.659465	7.1
2.04375	-20.7221	-18.8527	22.9705	-20.7221	22.9705	43.6926	0	0	0.659536	0.659536	0.659536	7.1
2.04417	-20.7053	-18.8609	22.9875	-20.7053	22.9875	43.6928	0	0	0.659631	0.659631	0.659631	7.1
2.04458	-20.6888	-18.8596	23.0068	-20.6888	23.0068	43.6956	0	0	0.65969	0.65969	0.65969	7.1
2.045	-20.6937	-18.8558	23.0231	-20.6937	23.0231	43.7168	0	0	0.65966	0.65966	0.65966	7.1
2.04542	-20.7191	-18.8515	23.031	-20.7191	23.031	43.7501	0	0	0.659552	0.659552	0.659552	7.1
2.04583	-20.7486	-18.8424	23.0309	-20.7486	23.0309	43.7796	0	0	0.65941	0.65941	0.65941	7.1
2.04625	-20.7693	-18.8271	23.0269	-20.7693	23.0269	43.7962	0	0	0.659276	0.659276	0.659276	7.08
2.04667	-20.7804	-18.8133	23.0206	-20.7804	23.0206	43.801	0	0	0.659182	0.659182	0.659182	7.08
2.04708	-20.7823	-18.8083	23.0085	-20.7823	23.0085	43.7908	0	0	0.659154	0.659154	0.659154	7.08
2.0475	-20.7734	-18.8104	22.9909	-20.7734	22.9909	43.7642	0	0	0.659191	0.659191	0.659191	7.08
2.04792	-20.7534	-18.8154	22.9745	-20.7534	22.9745	43.7279	0	0	0.65928	0.65928	0.65928	7.08
2.04833	-20.7181	-18.8212	22.9657	-20.7181	22.9657	43.6838	0	0	0.659429	0.659429	0.659429	7.1
2.04875	-20.6721	-18.8313	22.9634	-20.6721	22.9634	43.6356	0	0	0.659636	0.659636	0.659636	7.1
2.04917	-20.6314	-18.8462	22.9605	-20.6314	22.9605	43.5918	0	0	0.659841	0.659841	0.659841	7.1
2.04958	-20.6128	-18.86	22.9534	-20.6128	22.9534	43.5662	0	0	0.659961	0.659961	0.659961	7.12
2.05	-20.6183	-18.869	22.9435	-20.6183	22.9435	43.5618	0	0	0.659974	0.659974	0.659974	7.12
2.05042	-20.6262	-18.8728	22.9301	-20.6262	22.9301	43.5563	0	0	0.659957	0.659957	0.659957	7.12
2.05083	-20.6233	-18.8754	22.914	-20.6233	22.914	43.5373	0	0	0.659975	0.659975	0.659975	7.12
2.05125	-20.6156	-18.8791	22.8984	-20.6156	22.8984	43.5139	0	0	0.660016	0.660016	0.660016	7.12
2.05167	-20.6099	-18.8813	22.8878	-20.6099	22.8878	43.4977	0	0	0.660043	0.660043	0.660043	7.12
2.05208	-20.6016	-18.8784	22.8831	-20.6016	22.8831	43.4847	0	0	0.660062	0.660062	0.660062	7.12
2.0525	-20.583	-18.8678	22.8834	-20.583	22.8834	43.4664	0	0	0.66009	0.66009	0.66009	7.12
2.05292	-20.5681	-18.8532	22.8895	-20.5681	22.8895	43.4576	0	0	0.66009	0.66009	0.66009	7.12
2.05333	-20.5734	-18.8404	22.8971	-20.5734	22.8971	43.4705	0	0	0.660022	0.660022	0.660022	7.12
2.05375	-20.6038	-18.8331	22.8977	-20.6038	22.8977	43.5015	0	0	0.659883	0.659883	0.659883	7.12
2.05417	-20.6515	-18.8297	22.8877	-20.6515	22.8877	43.5392	0	0	0.659693	0.659693	0.659693	7.1
2.05458	-20.7035	-18.8234	22.8709	-20.7035	22.8709	43.5745	0	0	0.659475	0.659475	0.659475	7.1
2.055	-20.7496	-18.8097	22.8516	-20.7496	22.8516	43.6012	0	0	0.659251	0.659251	0.659251	7.08
2.05542	-20.7768	-18.7899	22.8296	-20.7768	22.8296	43.6064	0	0	0.659072	0.659072	0.659072	7.08
2.05583	-20.7803	-18.769	22.8077	-20.7803	22.8077	43.588	0	0	0.658976	0.658976	0.658976	7.08
2.05625	-20.7632	-18.7488	22.791	-20.7632	22.791	43.5542	0	0	0.658959	0.658959	0.658959	7.08
2.05667	-20.7365	-18.7302	22.7835	-20.7365	22.7835	43.52	0	0	0.658983	0.658983	0.658983	7.08
2.05708	-20.704	-18.7158	22.7861	-20.704	22.7861	43.4902	0	0	0.659047	0.659047	0.659047	7.08
2.0575	-20.6621	-18.7066	22.7965	-20.6621	22.7965	43.4586	0	0	0.659167	0.659167	0.659167	7.08
2.05792	-20.6226	-18.7042	22.8084	-20.6226	22.8084	43.431	0	0	0.659305	0.659305	0.659305	7.08
2.05833	-20.597	-18.708	22.8173	-20.597	22.8173	43.4143	0	0	0.659415	0.659415	0.659415	7.1
2.05875	-20.5832	-18.7091	22.8232	-20.5832	22.8232	43.4064	0	0	0.659471	0.659471	0.659471	7.1
2.05917	-20.5724	-18.7019	22.8271	-20.5724	22.8271	43.3995	0	0	0.659483	0.659483	0.659483	7.1
2.05958	-20.5714	-18.6894	22.826	-20.5714	22.826	43.3974	0	0	0.659439	0.659439	0.659439	7.1
2.06	-20.5901	-18.6812	22.8175	-20.5901	22.8175	43.4076	0	0	0.659337	0.659337	0.659337	7.08
2.06042	-20.6192	-18.6805	22.8067	-20.6192	22.8067	43.4259	0	0	0.659226	0.659226	0.659226	7.08
2.06083	-20.6503	-18.685	22.7976	-20.6503	22.7976	43.4479	0	0	0.659128	0.659128	0.659128	7.08
2.06125	-20.6772	-18.6957	22.791	-20.6772	22.791	43.4682	0	0	0.659069	0.659069	0.659069	7.08
2.06167	-20.6889	-18.7089	22.7854	-20.6889	22.7854	43.4743	0	0	0.659076	0.659076	0.659076	7.08
2.06208	-20.6805	-18.72	22.7799	-20.6805	22.7799	43.4604	0	0	0.659148	0.659148	0.659148	7.08
2.0625	-20.6655	-18.7268	22.7757	-20.6655	22.7757	43.4411	0	0	0.659229	0.659229	0.659229	7.08
2.06292	-20.654	-18.7256	22.7714	-20.654	22.7714	43.4254	0	0	0.659266	0.659266	0.659266	7.08
2.06333	-20.6339	-18.7112	22.7681	-20.6339	22.7681	43.4021	0	0	0.659283	0.659283	0.659283	7.08
2.06375	-20.6015	-18.6856	22.7639	-20.6015	22.7639	43.3654	0	0	0.659303	0.659303	0.659303	7.08
2.06417	-20.5762	-18.6607	22.7563	-20.5762	22.7563	43.3325	0	0	0.659299	0.659299	0.659299	7.08
2.06458	-20.5706	-18.643	22.747	-20.5706	22.747	43.3176	0	0	0.65925	0.65925	0.65925	7.08
2.065	-20.5759	-18.6289	22.7389	-20.5759	22.7389	43.3147	0	0	0.659175	0.659175	0.659175	7.08
2.06542	-20.5835	-18.6149	22.7334	-20.5835	22.7334	43.3169	0	0	0.659092	0.659092	0.659092	7.08
2.06583	-20.5917	-18.6036	22.7274	-20.5917	22.7274	43.3191	0	0	0.659018	0.659018	0.659018	7.08
2.06625	-20.5977	-18.5974	22.7222	-20.5977	22.7222	43.3199	0	0	0.658971	0.658971	0.658971	7.08
2.06667	-20.5974	-18.5949	22.7207	-20.5974	22.7207	43.3181	0	0	0.658962	0.658962	0.658962	7.08
2.06708	-20.5956	-18.5938	22.7205	-20.5956	22.7205	43.3161	0	0	0.658965	0.658965	0.658965	7.08
2.0675	-20.5955	-18.5934	22.7172	-20.5955	22.7172	43.3127	0	0	0.658963	0.658963	0.658963	7.08
2.06792	-20.5889	-18.5978	22.709	-20.5889	22.709	43.2979	0	0	0.659002	0.659002	0.659002	7.08
2.06833	-20.5789	-18.6113	22.6989	-20.5789	22.6989	43.2779	0	0	0.659089	0.659089	0.659089	7.08
2.06875	-20.5785	-18.6292	22.6906	-20.5785	22.6906	43.2691	0	0	0.659158	0.659158	0.659158	7.08
2.06917	-20.5892	-18.6442	22.6864	-20.5892	22.6864	43.2756	0	0	0.659176	0.659176	0.659176	7.08
2.06958	-20.5929	-18.6529	22.6875	-20.5929	22.6875	43.2804	0	0	0.659196	0.659196	0.659196	7.08
2.07	-20.5713	-18.6539	22.6914	-20.5713	22.6914	43.2627	0	0	0.65928	0.65928	0.65928	7.08
2.07042	-20.532	-18.6437	22.6945	-20.532	22.6945	43.2265	0	0	0.659386	0.659386	0.659386	7.1
2.07083	-20.4926	-18.6232	22.6967	-20.4926	22.6967	43.1893	0	0	0.659453	0.659453	0.659453	7.1
2.07125	-20.4611	-18.602	22.6959	-20.4611	22.6959	43.157	0	0	0.659487	0.659487	0.659487	7.1
2.07167	-20.4319	-18.5838	22.6889	-20.4319	22.6889	43.1208	0	0	0.659524	0.659524	0.659524	7.1
2.07208	-20.4001	-18.5652	22.6766	-20.4001	22.6766	43.0767	0	0	0.659567	0.659567	0.659567	7.1
2.0725	-20.377	-18.5472	22.6645	-20.377	22.6645	43.0414	0	0	0.659581	0.659581	0.659581	7.1
2.07292	-20.3702	-18.5322	22.6555	-20.3702	22.6555	43.0258	0	0	0.659547	0.659547	0.659547	7.1
2.07333	-20.377	-18.5181	22.6477	-20.377	22.6477	43.0247	0	0	0.659466	0.659466	0.659466	7.1
2.07375	-20.3839	-18.5004	22.6405	-20.3839	22.6405	43.0244	0	0	0.65937	0.65937	0.65937	7.1
2.07417	-20.3841	-18.483	22.6342	-20.3841	22.6342	43.0183	0	0	0.659301	0.659301	0.659301	7.08
2.07458	-20.3815	-18.4774	22.628	-20.3815	22.628	43.0095	0	0	0.659288	0.659288	0.659288	7.08
2.075	-20.38	-18.4863	22.6215	-20.38	22.6215	43.0015	0	0	0.659327	0.659327	0.659327	7.08
2.07542	-20.3888	-18.5087	22.6176	-20.3888	22.6176	43.0065	0	0	0.65938	0.65938	0.65938	7.1
2.07583	-20.4065	-18.5398	22.6167	-20.4065	22.6167	43.0233	0	0	0.659435	0.659435	0.659435	7.1
2.07625	-20.427	-18.5703	22.6177	-20.427	22.6177	43.0447	0	0	0.659478	0.659478	0.659478	7.1
2.07667	-20.4447	-18.5874	22.6234	-20.4447	22.6234	43.0681	0	0	0.65948	0.65948	0.65948	7.1
2.07708	-20.4524	-18.5842	22.635	-20.4524	22.635	43.0874	0	0	0.65944	0.65944	0.65944	7.1
2.0775	-20.4463	-18.5683	22.6477	-20.4463	22.6477	43.0941	0	0	0.659403	0.659403	0.659403	7.1
2.07792	-20.4264	-18.5495	22.6548	-20.4264	22.6548	43.0812	0	0	0.659406	0.659406	0.659406	7.1
2.07833	-20.4049	-18.5347	22.6565	-20.4049	22.6565	43.0614	0	0	0.659428	0.659428	0.659428	7.1
2.07875	-20.3909	-18.5261	22.6549	-20.3909	22.6549	43.0458	0	0	0.659446	0.659446	0.659446	7.1
2.07917	-20.3851	-18.5293	22.6471	-20.3851	22.6471	43.0322	0	0	0.659479	0.659479	0.659479	7.1
2.07958	-20.3916	-18.5473	22.6308	-20.3916	22.6308	43.0225	0	0	0.659522	0.659522	0.659522	7.1
2.08	-20.4106	-18.5715	22.61	-20.4106	22.61	43.0206	0	0	0.659542	0.659542	0.659542	7.1
2.08042	-20.4301	-18.5864	22.5914	-20.4301	22.5914	43.0215	0	0	0.659524	0.659524	0.659524	7.1
2.08083	-20.4384	-18.5797	22.5777	-20.4384	22.5777	43.0161	0	0	0.659465	0.659465	0.659465	7.1
2.08125	-20.4353	-18.5567	22.5666	-20.4353	22.5666	43.0019	0	0	0.659386	0.659386	0.659386	7.1
2.08167	-20.4236	-18.5303	22.5568	-20.4236	22.5568	42.9804	0	0	0.659325	0.659325	0.659325	7.08
2.08208	-20.4021	-18.5103	22.5502	-20.4021	22.5502	42.9523	0	0	0.659326	0.659326	0.659326	7.08
2.0825	-20.3765	-18.4976	22.5491	-20.3765	22.5491	42.9256	0	0	0.659372	0.659372	0.659372	7.1
2.08292	-20.3548	-18.492	22.5525	-20.3548	22.5525	42.9073	0	0	0.659431	0.659431	0.659431	7.1
2.08333	-20.3248	-18.4947	22.5568	-20.3248	22.5568	42.8817	0	0	0.659554	0.659554	0.659554	7.1
2.08375	-20.2766	-18.5037	22.5587	-20.2766	22.5587	42.8353	0	0	0.659769	0.659769	0.659769	7.1
2.08417	-20.2296	-18.5113	22.5572	-20.2296	22.5572	42.7868	0	0	0.659973	0.659973	0.659973	7.12
2.08458	-20.2112	-18.5077	22.5551	-20.2112	22.5551	42.7663	0	0	0.660028	0.660028	0.660028	7.12
2.085	-20.2203	-18.4934	22.5567	-20.2203	22.5567	42.777	0	0	0.659938	0.659938	0.659938	7.12
2.08542	-20.2399	-18.4761	22.5628	-20.2399	22.5628	42.8027	0	0	0.659799	0.659799	0.659799	7.1
2.08583	-20.27	-18.4614	22.5681	-20.27	22.5681	42.8381	0	0	0.65963	0.65963	0.65963	7.1
2.08625	-20.3128	-18.4496	22.5696	-20.3128	22.5696	42.8825	0	0	0.659425	0.659425	0.659425	7.1
2.08667	-20.355	-18.4405	22.5684	-20.355	22.5684	42.9235	0	0	0.659233	0.659233	0.659233	7.08
2.08708	-20.3784	-18.4374	22.5653	-20.3784	22.5653	42.9436	0	0	0.659134	0.659134	0.659134	7.08
2.0875	-20.3832	-18.4421	22.5577	-20.3832	22.5577	42.9409	0	0	0.659132	0.659132	0.659132	7.08
2.08792	-20.3828	-18.4513	22.5424	-20.3828	22.5424	42.9252	0	0	0.659167	0.659167	0.659167	7.08
2.08833	-20.3894	-18.4626	22.5248	-20.3894	22.5248	42.9143	0	0	0.659183	0.659183	0.659183	7.08
2.08875	-20.4064	-18.4744	22.5143	-20.4064	22.5143	42.9206	0	0	0.659165	0.659165	0.659165	7.08
2.08917	-20.4188	-18.4826	22.5122	-20.4188	22.5122	42.931	0	0	0.65915	0.65915	0.65915	7.08
2.08958	-20.4126	-18.481	22.5121	-20.4126	22.5121	42.9247	0	0	0.659167	0.659167	0.659167	7.08
2.09	-20.3869	-18.4684	22.5072	-20.3869	22.5072	42.894	0	0	0.659212	0.659212	0.659212	7.08
2.09042	-20.3466	-18.4565	22.4989	-20.3466	22.4989	42.8455	0	0	0.659314	0.659314	0.659314	7.08
2.09083	-20.2981	-18.4586	22.49	-20.2981	22.49	42.7881	0	0	0.659501	0.659501	0.659501	7.1
2.09125	-20.2535	-18.4721	22.4795	-20.2535	22.4795	42.733	0	0	0.659719	0.659719	0.659719	7.1
2.09167	-20.2342	-18.4805	22.4708	-20.2342	22.4708	42.705	0	0	0.659822	0.659822	0.659822	7.1
2.09208	-20.2474	-18.4769	22.4702	-20.2474	22.4702	42.7176	0	0	0.659759	0.659759	0.659759	7.1
2.0925	-20.2801	-18.4724	22.4778	-20.2801	22.4778	42.7579	0	0	0.65962	0.65962	0.65962	7.1
2.09292	-20.3161	-18.4721	22.4873	-20.3161	22.4873	42.8033	0	0	0.659487	0.659487	0.659487	7.1
2.09333	-20.341	-18.4635	22.4944	-20.341	22.4944	42.8354	0	0	0.659362	0.659362	0.659362	7.1
2.09375	-20.3462	-18.4409	22.4983	-20.3462	22.4983	42.8445	0	0	0.659255	0.659255	0.659255	7.08
2.09417	-20.3337	-18.4203	22.497	-20.3337	22.497	42.8307	0	0	0.659221	0.659221	0.659221	7.08
2.09458	-20.3172	-18.4178	22.4868	-20.3172	22.4868	42.804	0	0	0.659271	0.659271	0.659271	7.08
2.095	-20.3104	-18.425	22.4707	-20.3104	22.4707	42.7811	0	0	0.659322	0.659322	0.659322	7.08
2.09542	-20.3213	-18.4266	22.4577	-20.3213	22.4577	42.779	0	0	0.659285	0.659285	0.659285	7.08
2.09583	-20.3506	-18.4241	22.4528	-20.3506	22.4528	42.8034	0	0	0.659165	0.659165	0.659165	7.08
2.09625	-20.3856	-18.428	22.4573	-20.3856	22.4573	42.8429	0	0	0.659051	0.659051	0.659051	7.08
2.09667	-20.4058	-18.4408	22.467	-20.4058	22.467	42.8728	0	0	0.659028	0.659028	0.659028	7.08
2.09708	-20.4032	-18.4551	22.4772	-20.4032	22.4772	42.8804	0	0	0.659095	0.659095	0.659095	7.08
2.0975	-20.3863	-18.4665	22.4848	-20.3863	22.4848	42.8711	0	0	0.659203	0.659203	0.659203	7.08
2.09792	-20.3619	-18.4721	22.4855	-20.3619	22.4855	42.8475	0	0	0.659316	0.659316	0.659316	7.08
2.09833	-20.327	-18.4685	22.4777	-20.327	22.4777	42.8047	0	0	0.65943	0.65943	0.65943	7.1
2.09875	-20.2874	-18.4572	22.461	-20.2874	22.461	42.7485	0	0	0.659531	0.659531	0.659531	7.1
2.09917	-20.2636	-18.441	22.4407	-20.2636	22.4407	42.7043	0	0	0.659553	0.659553	0.659553	7.1
2.09958	-20.2622	-18.4206	22.4258	-20.2622	22.4258	42.688	0	0	0.659476	0.659476	0.659476	7.1
2.1	-20.2704	-18.3964	22.4194	-20.2704	22.4194	42.6898	0	0	0.659351	0.659351	0.659351	7.08
2.10042	-20.2676	-18.3722	22.4207	-20.2676	22.4207	42.6883	0	0	0.659266	0.659266	0.659266	7.08
2.10083	-20.255	-18.3557	22.426	-20.255	22.426	42.681	0	0	0.65925	0.65925	0.65925	7.08
2.10125	-20.2418	-18.3493	22.4331	-20.2418	22.4331	42.6749	0	0	0.659275	0.659275	0.659275	7.08
2.10167	-20.22	-18.35	22.4411	-20.22	22.4411	42.6611	0	0	0.659361	0.659361	0.659361	7.1
2.10208	-20.1848	-18.3517	22.447	-20.1848	22.447	42.6318	0	0	0.6595	0.6595	0.6595	7.1
2.1025	-20.1456	-18.352	22.4507	-20.1456	22.4507	42.5963	0	0	0.659649	0.659649	0.659649	7.1
2.10292	-20.1252	-18.355	22.4528	-20.1252	22.4528	42.578	0	0	0.659737	0.659737	0.659737	7.1
2.10333	-20.1291	-18.3644	22.4515	-20.1291	22.4515	42.5807	0	0	0.659759	0.659759	0.659759	7.1
2.10375	-20.1471	-18.3781	22.448	-20.1471	22.448	42.5951	0	0	0.659745	0.659745	0.659745	7.1
2.10417	-20.1713	-18.3903	22.4442	-20.1713	22.4442	42.6155	0	0	0.659701	0.659701	0.659701	7.1
2.10458	-20.1908	-18.3973	22.4416	-20.1908	22.4416	42.6324	0	0	0.659655	0.659655	0.659655	7.1
2.105	-20.1929	-18.3996	22.4402	-20.1929	22.4402	42.6331	0	0	0.659656	0.659656	0.659656	7.1
2.10542	-20.1779	-18.4018	22.442	-20.1779	22.442	42.6199	0	0	0.659721	0.659721	0.659721	7.1
2.10583	-20.1595	-18.4048	22.4486	-20.1595	22.4486	42.6082	0	0	0.659803	0.659803	0.659803	7.1
2.10625	-20.1438	-18.4039	22.4558	-20.1438	22.4558	42.5996	0	0	0.659859	0.659859	0.659859	7.1
2.10667	-20.1308	-18.3946	22.4577	-20.1308	22.4577	42.5886	0	0	0.659872	0.659872	0.659872	7.12
2.10708	-20.1268	-18.381	22.4534	-20.1268	22.4534	42.5802	0	0	0.659833	0.659833	0.659833	7.1
2.1075	-20.1407	-18.3717	22.4454	-20.1407	22.4454	42.5861	0	0	0.659743	0.659743	0.659743	7.1
2.10792	-20.1625	-18.3647	22.4337	-20.1625	22.4337	42.5962	0	0	0.659633	0.659633	0.659633	7.1
2.10833	-20.1732	-18.3498	22.4219	-20.1732	22.4219	42.5951	0	0	0.659532	0.659532	0.659532	7.1
2.10875	-20.174	-18.3261	22.416	-20.174	22.416	42.59	0	0	0.659435	0.659435	0.659435	7.1
2.10917	-20.1771	-18.3062	22.4179	-20.1771	22.4179	42.595	0	0	0.659346	0.659346	0.659346	7.08
2.10958	-20.1831	-18.3022	22.4226	-20.1831	22.4226	42.6056	0	0	0.659309	0.659309	0.659309	7.08
2.11	-20.1808	-18.3149	22.4204	-20.1808	22.4204	42.6012	0	0	0.659367	0.659367	0.659367	7.1
2.11042	-20.1683	-18.3354	22.4101	-20.1683	22.4101	42.5785	0	0	0.659492	0.659492	0.659492	7.1
2.11083	-20.1525	-18.3553	22.3961	-20.1525	22.3961	42.5486	0	0	0.659627	0.659627	0.659627	7.1
2.11125	-20.1366	-18.3701	22.3822	-20.1366	22.3822	42.5188	0	0	0.659742	0.659742	0.659742	7.1
2.11167	-20.1239	-18.3782	22.3698	-20.1239	22.3698	42.4938	0	0	0.65982	0.65982	0.65982	7.1
2.11208	-20.1225	-18.3786	22.358	-20.1225	22.358	42.4805	0	0	0.659824	0.659824	0.659824	7.1
2.1125	-20.1344	-18.3684	22.3515	-20.1344	22.3515	42.4859	0	0	0.659739	0.659739	0.659739	7.1
2.11292	-20.1496	-18.3484	22.3556	-20.1496	22.3556	42.5053	0	0	0.659604	0.659604	0.659604	7.1
2.11333	-20.1581	-18.3263	22.3679	-20.1581	22.3679	42.526	0	0	0.659488	0.659488	0.659488	7.1
2.11375	-20.1552	-18.3107	22.3796	-20.1552	22.3796	42.5348	0	0	0.659439	0.659439	0.659439	7.1
2.11417	-20.1424	-18.3042	22.385	-20.1424	22.385	42.5274	0	0	0.659463	0.659463	0.659463	7.1
2.11458	-20.1255	-18.3006	22.389	-20.1255	22.389	42.5146	0	0	0.659513	0.659513	0.659513	7.1
2.115	-20.1149	-18.2906	22.396	-20.1149	22.396	42.5109	0	0	0.659514	0.659514	0.659514	7.1
2.11542	-20.1127	-18.2746	22.4013	-20.1127	22.4013	42.514	0	0	0.659461	0.659461	0.659461	7.1
2.11583	-20.1184	-18.2634	22.3996	-20.1184	22.3996	42.518	0	0	0.659395	0.659395	0.659395	7.1
2.11625	-20.1362	-18.2648	22.3935	-20.1362	22.3935	42.5297	0	0	0.659333	0.659333	0.659333	7.08
2.11667	-20.1571	-18.2743	22.3905	-20.1571	22.3905	42.5476	0	0	0.659291	0.659291	0.659291	7.08
2.11708	-20.1626	-18.2848	22.3931	-20.1626	22.3931	42.5557	0	0	0.659312	0.659312	0.659312	7.08
2.1175	-20.1465	-18.3	22.3992	-20.1465	22.3992	42.5456	0	0	0.659433	0.659433	0.659433	7.1
2.11792	-20.127	-18.3266	22.406	-20.127	22.406	42.533	0	0	0.659612	0.659612	0.659612	7.1
2.11833	-20.1176	-18.3585	22.4128	-20.1176	22.4128	42.5304	0	0	0.659773	0.659773	0.659773	7.1
2.11875	-20.1071	-18.3817	22.4193	-20.1071	22.4193	42.5264	0	0	0.659905	0.659905	0.659905	7.12
2.11917	-20.0837	-18.3893	22.4244	-20.0837	22.4244	42.5081	0	0	0.660023	0.660023	0.660023	7.12
2.11958	-20.0572	-18.3854	22.4269	-20.0572	22.4269	42.4842	0	0	0.660108	0.660108	0.660108	7.12
2.12	-20.0504	-18.3784	22.4262	-20.0504	22.4262	42.4766	0	0	0.660106	0.660106	0.660106	7.12
2.12042	-20.0697	-18.3656	22.4235	-20.0697	22.4235	42.4932	0	0	0.659983	0.659983	0.659983	7.12
2.12083	-20.1037	-18.3442	22.4199	-20.1037	22.4199	42.5236	0	0	0.65977	0.65977	0.65977	7.1
2.12125	-20.1347	-18.3202	22.4153	-20.1347	22.4153	42.55	0	0	0.65956	0.65956	0.65956	7.1
2.12167	-20.1579	-18.3005	22.4104	-20.1579	22.4104	42.5683	0	0	0.659394	0.659394	0.659394	7.1
2.12208	-20.1764	-18.285	22.4045	-20.1764	22.4045	42.5809	0	0	0.659264	0.659264	0.659264	7.08
2.1225	-20.1856	-18.2717	22.3979	-20.1856	22.3979	42.5835	0	0	0.659176	0.659176	0.659176	7.08
2.12292	-20.1864	-18.2663	22.3935	-20.1864	22.3935	42.5799	0	0	0.659151	0.659151	0.659151	7.08
2.12333	-20.1857	-18.273	22.3961	-20.1857	22.3961	42.5818	0	0	0.65918	0.65918	0.65918	7.08
2.12375	-20.1941	-18.2867	22.4063	-20.1941	22.4063	42.6003	0	0	0.659205	0.659205	0.659205	7.08
2.12417	-20.2107	-18.3033	22.4178	-20.2107	22.4178	42.6285	0	0	0.659209	0.659209	0.659209	7.08
2.12458	-20.2234	-18.3259	22.4251	-20.2234	22.4251	42.6485	0	0	0.659251	0.659251	0.659251	7.08
2.125	-20.2269	-18.3548	22.4266	-20.2269	22.4266	42.6535	0	0	0.659351	0.659351	0.659351	7.1
2.12542	-20.2176	-18.3801	22.4206	-20.2176	22.4206	42.6383	0	0	0.659484	0.659484	0.659484	7.1
2.12583	-20.195	-18.3893	22.4072	-20.195	22.4072	42.6023	0	0	0.659602	0.659602	0.659602	7.1
2.12625	-20.1651	-18.3824	22.3898	-20.1651	22.3898	42.5549	0	0	0.659685	0.659685	0.659685	7.1
2.12667	-20.1388	-18.368	22.3754	-20.1388	22.3754	42.5142	0	0	0.659724	0.659724	0.659724	7.1
2.12708	-20.126	-18.3523	22.3684	-20.126	22.3684	42.4944	0	0	0.65971	0.65971	0.65971	7.1
2.1275	-20.1223	-18.3342	22.3683	-20.1223	22.3683	42.4906	0	0	0.659653	0.659653	0.659653	7.1
2.12792	-20.1169	-18.3117	22.3702	-20.1169	22.3702	42.4871	0	0	0.659585	0.659585	0.659585	7.1
2.12833	-20.1007	-18.2907	22.3693	-20.1007	22.3693	42.47	0	0	0.659564	0.659564	0.659564	7.1
2.12875	-20.0728	-18.2754	22.3639	-20.0728	22.3639	42.4367	0	0	0.659607	0.659607	0.659607	7.1
2.12917	-20.0486	-18.2662	22.355	-20.0486	22.355	42.4036	0	0	0.659661	0.659661	0.659661	7.1
2.12958	-20.049	-18.2576	22.3459	-20.049	22.3459	42.3949	0	0	0.659624	0.659624	0.659624	7.1
2.13	-20.0706	-18.2425	22.3381	-20.0706	22.3381	42.4087	0	0	0.659482	0.659482	0.659482	7.1
2.13042	-20.0881	-18.2226	22.3336	-20.0881	22.3336	42.4218	0	0	0.659337	0.659337	0.659337	7.08
2.13083	-20.094	-18.2054	22.3343	-20.094	22.3343	42.4284	0	0	0.659248	0.659248	0.659248	7.08
2.13125	-20.11	-18.1993	22.3384	-20.11	22.3384	42.4484	0	0	0.659165	0.659165	0.659165	7.08
2.13167	-20.1415	-18.2026	22.3427	-20.1415	22.3427	42.4841	0	0	0.65906	0.65906	0.65906	7.08
2.13208	-20.1545	-18.2092	22.3433	-20.1545	22.3433	42.4978	0	0	0.659037	0.659037	0.659037	7.08
2.1325	-20.1318	-18.2199	22.3413	-20.1318	22.3413	42.4731	0	0	0.659164	0.659164	0.659164	7.08
2.13292	-20.0982	-18.2371	22.3408	-20.0982	22.3408	42.439	0	0	0.659358	0.659358	0.659358	7.1
2.13333	-20.0749	-18.2554	22.3417	-20.0749	22.3417	42.4166	0	0	0.659517	0.659517	0.659517	7.1
2.13375	-20.0504	-18.2641	22.3407	-20.0504	22.3407	42.3911	0	0	0.659644	0.659644	0.659644	7.1
2.13417	-20.0129	-18.2588	22.3342	-20.0129	22.3342	42.3471	0	0	0.659763	0.659763	0.659763	7.1
2.13458	-19.9711	-18.2464	22.3241	-19.9711	22.3241	42.2952	0	0	0.65987	0.65987	0.65987	7.12
2.135	-19.9346	-18.2348	22.3151	-19.9346	22.3151	42.2497	0	0	0.659961	0.659961	0.659961	7.12
2.13542	-19.9058	-18.2289	22.3079	-19.9058	22.3079	42.2137	0	0	0.660046	0.660046	0.660046	7.12
2.13583	-19.8888	-18.2271	22.3019	-19.8888	22.3019	42.1907	0	0	0.660102	0.660102	0.660102	7.12
2.13625	-19.8927	-18.2273	22.2975	-19.8927	22.2975	42.1903	0	0	0.660088	0.660088	0.660088	7.12
2.13667	-19.9143	-18.2286	22.2973	-19.9143	22.2973	42.2117	0	0	0.660011	0.660011	0.660011	7.12
2.13708	-19.9487	-18.2266	22.3015	-19.9487	22.3015	42.2502	0	0	0.659873	0.659873	0.659873	7.12
2.1375	-19.9951	-18.222	22.3065	-19.9951	22.3065	42.3016	0	0	0.659681	0.659681	0.659681	7.1
2.13792	-20.0483	-18.2146	22.3077	-20.0483	22.3077	42.356	0	0	0.659452	0.659452	0.659452	7.1
2.13833	-20.0977	-18.2073	22.3051	-20.0977	22.3051	42.4028	0	0	0.659236	0.659236	0.659236	7.08
2.13875	-20.1261	-18.2011	22.3011	-20.1261	22.3011	42.4272	0	0	0.659105	0.659105	0.659105	7.08
2.13917	-20.1235	-18.1959	22.3005	-20.1235	22.3005	42.424	0	0	0.659094	0.659094	0.659094	7.08
2.13958	-20.0965	-18.197	22.3057	-20.0965	22.3057	42.4023	0	0	0.6592	0.6592	0.6592	7.08
2.14	-20.0596	-18.2021	22.3128	-20.0596	22.3128	42.3724	0	0	0.65936	0.65936	0.65936	7.1
2.14042	-20.0274	-18.2082	22.3184	-20.0274	22.3184	42.3458	0	0	0.659507	0.659507	0.659507	7.1
2.14083	-20.0026	-18.2122	22.3211	-20.0026	22.3211	42.3237	0	0	0.659616	0.659616	0.659616	7.1
2.14125	-19.9838	-18.2158	22.3228	-19.9838	22.3228	42.3066	0	0	0.659701	0.659701	0.659701	7.1
2.14167	-19.975	-18.2244	22.3231	-19.975	22.3231	42.2981	0	0	0.659769	0.659769	0.659769	7.1
2.14208	-19.9795	-18.2368	22.3196	-19.9795	22.3196	42.2991	0	0	0.6598	0.6598	0.6598	7.1
2.1425	-19.9933	-18.2485	22.3138	-19.9933	22.3138	42.3072	0	0	0.659793	0.659793	0.659793	7.1
2.14292	-20.0042	-18.2559	22.3092	-20.0042	22.3092	42.3134	0	0	0.65978	0.65978	0.65978	7.1
2.14333	-20.0035	-18.2604	22.3061	-20.0035	22.3061	42.3096	0	0	0.6598	0.6598	0.6598	7.1
2.14375	-19.9936	-18.2634	22.3043	-19.9936	22.3043	42.2979	0	0	0.659849	0.659849	0.659849	7.1
2.14417	-19.9902	-18.264	22.305	-19.9902	22.305	42.2952	0	0	0.659864	0.659864	0.659864	7.1
2.14458	-20.0007	-18.2647	22.3108	-20.0007	22.3108	42.3115	0	0	0.659829	0.659829	0.659829	7.1
2.145	-20.0197	-18.2691	22.3225	-20.0197	22.3225	42.3421	0	0	0.659776	0.659776	0.659776	7.1
2.14542	-20.0357	-18.2705	22.3366	-20.0357	22.3366	42.3723	0	0	0.659724	0.659724	0.659724	7.1
2.14583	-20.0502	-18.2601	22.3519	-20.0502	22.3519	42.4021	0	0	0.65963	0.65963	0.65963	7.1
2.14625	-20.0715	-18.2398	22.3651	-20.0715	22.3651	42.4366	0	0	0.659473	0.659473	0.659473	7.1
2.14667	-20.0901	-18.2158	22.3696	-20.0901	22.3696	42.4597	0	0	0.659309	0.659309	0.659309	7.08
2.14708	-20.0901	-18.1895	22.3617	-20.0901	22.3617	42.4518	0	0	0.659205	0.659205	0.659205	7.08
2.1475	-20.0678	-18.1632	22.3447	-20.0678	22.3447	42.4125	0	0	0.659182	0.659182	0.659182	7.08
2.14792	-20.0357	-18.1488	22.3288	-20.0357	22.3288	42.3645	0	0	0.659243	0.659243	0.659243	7.08
2.14833	-20.0099	-18.1554	22.3198	-20.0099	22.3198	42.3297	0	0	0.659365	0.659365	0.659365	7.1
2.14875	-20.0034	-18.1727	22.3182	-20.0034	22.3182	42.3216	0	0	0.659457	0.659457	0.659457	7.1
2.14917	-20.0205	-18.1866	22.3218	-20.0205	22.3218	42.3424	0	0	0.659448	0.659448	0.659448	7.1
2.14958	-20.055	-18.1965	22.3279	-20.055	22.3279	42.3829	0	0	0.659358	0.659358	0.659358	7.1
2.15	-20.0934	-18.2062	22.3333	-20.0934	22.3333	42.4268	0	0	0.659253	0.659253	0.659253	7.08
2.15042	-20.1264	-18.2151	22.3356	-20.1264	22.3356	42.4619	0	0	0.659165	0.659165	0.659165	7.08
2.15083	-20.1419	-18.2213	22.3322	-20.1419	22.3322	42.4741	0	0	0.65913	0.65913	0.65913	7.08
2.15125	-20.1318	-18.2316	22.3234	-20.1318	22.3234	42.4553	0	0	0.659207	0.659207	0.659207	7.08
2.15167	-20.1032	-18.2488	22.3158	-20.1032	22.3158	42.419	0	0	0.65938	0.65938	0.65938	7.1
2.15208	-20.0755	-18.2637	22.3148	-20.0755	22.3148	42.3903	0	0	0.659544	0.659544	0.659544	7.1
2.1525	-20.0576	-18.2679	22.3201	-20.0576	22.3201	42.3777	0	0	0.659628	0.659628	0.659628	7.1
2.15292	-20.0464	-18.2593	22.327	-20.0464	22.327	42.3733	0	0	0.659638	0.659638	0.659638	7.1
2.15333	-20.0461	-18.2402	22.3344	-20.0461	22.3344	42.3804	0	0	0.659565	0.659565	0.659565	7.1
2.15375	-20.0597	-18.2124	22.3421	-20.0597	22.3421	42.4019	0	0	0.659406	0.659406	0.659406	7.1
2.15417	-20.0784	-18.1841	22.3452	-20.0784	22.3452	42.4237	0	0	0.659225	0.659225	0.659225	7.08
2.15458	-20.0854	-18.164	22.3416	-20.0854	22.3416	42.427	0	0	0.659119	0.659119	0.659119	7.08
2.155	-20.0839	-18.1558	22.3337	-20.0839	22.3337	42.4177	0	0	0.659091	0.659091	0.659091	7.08
2.15542	-20.0922	-18.1559	22.3258	-20.0922	22.3258	42.418	0	0	0.659059	0.659059	0.659059	7.08
2.15583	-20.1073	-18.158	22.3196	-20.1073	22.3196	42.4269	0	0	0.659009	0.659009	0.659009	7.08
2.15625	-20.1067	-18.1608	22.3177	-20.1067	22.3177	42.4244	0	0	0.659022	0.659022	0.659022	7.08
2.15667	-20.0805	-18.1641	22.3228	-20.0805	22.3228	42.4033	0	0	0.659134	0.659134	0.659134	7.08
2.15708	-20.0433	-18.1682	22.3328	-20.0433	22.3328	42.3761	0	0	0.659292	0.659292	0.659292	7.08
2.1575	-20.0148	-18.1719	22.3438	-20.0148	22.3438	42.3586	0	0	0.659415	0.659415	0.659415	7.1
2.15792	-19.997	-18.175	22.3523	-19.997	22.3523	42.3493	0	0	0.659496	0.659496	0.659496	7.1
2.15833	-19.9819	-18.1777	22.3577	-19.9819	22.3577	42.3396	0	0	0.659564	0.659564	0.659564	7.1
2.15875	-19.974	-18.1771	22.359	-19.974	22.359	42.333	0	0	0.659592	0.659592	0.659592	7.1
2.15917	-19.9822	-18.1739	22.3534	-19.9822	22.3534	42.3357	0	0	0.659548	0.659548	0.659548	7.1
2.15958	-20.0058	-18.17	22.343	-20.0058	22.343	42.3488	0	0	0.659442	0.659442	0.659442	7.1
2.16	-20.0274	-18.1659	22.333	-20.0274	22.333	42.3604	0	0	0.659343	0.659343	0.659343	7.08
2.16042	-20.0327	-18.1616	22.3284	-20.0327	22.3284	42.361	0	0	0.659305	0.659305	0.659305	7.08
2.16083	-20.0276	-18.1632	22.3282	-20.0276	22.3282	42.3557	0	0	0.65933	0.65933	0.65933	7.08
2.16125	-20.0215	-18.1743	22.3288	-20.0215	22.3288	42.3503	0	0	0.659397	0.659397	0.659397	7.1
2.16167	-20.0191	-18.1857	22.3296	-20.0191	22.3296	42.3486	0	0	0.659451	0.659451	0.659451	7.1
2.16208	-20.0155	-18.1861	22.3305	-20.0155	22.3305	42.346	0	0	0.659467	0.659467	0.659467	7.1
2.1625	-20.0105	-18.1729	22.3302	-20.0105	22.3302	42.3408	0	0	0.659433	0.659433	0.659433	7.1
2.16292	-20.0086	-18.1507	22.326	-20.0086	22.326	42.3346	0	0	0.659352	0.659352	0.659352	7.1
2.16333	-20.0136	-18.1267	22.3164	-20.0136	22.3164	42.3301	0	0	0.659237	0.659237	0.659237	7.08
2.16375	-20.0268	-18.1096	22.3038	-20.0268	22.3038	42.3306	0	0	0.659118	0.659118	0.659118	7.08
2.16417	-20.0386	-18.1026	22.2923	-20.0386	22.2923	42.3309	0	0	0.659045	0.659045	0.659045	7.08
2.16458	-20.0408	-18.0991	22.2861	-20.0408	22.2861	42.3268	0	0	0.659021	0.659021	0.659021	7.08
2.165	-20.0299	-18.0926	22.2849	-20.0299	22.2849	42.3148	0	0	0.659036	0.659036	0.659036	7.08
2.16542	-20.0083	-18.087	22.2865	-20.0083	22.2865	42.2948	0	0	0.659096	0.659096	0.659096	7.08
2.16583	-19.9818	-18.0875	22.2906	-19.9818	22.2906	42.2724	0	0	0.659198	0.659198	0.659198	7.08
2.16625	-19.9497	-18.0928	22.2989	-19.9497	22.2989	42.2486	0	0	0.659342	0.659342	0.659342	7.08
2.16667	-19.9165	-18.1022	22.3123	-19.9165	22.3123	42.2287	0	0	0.659506	0.659506	0.659506	7.1
2.16708	-19.8963	-18.1199	22.325	-19.8963	22.325	42.2213	0	0	0.659655	0.659655	0.659655	7.1
2.1675	-19.8994	-18.1474	22.3329	-19.8994	22.3329	42.2322	0	0	0.659753	0.659753	0.659753	7.1
2.16792	-19.9229	-18.1759	22.3383	-19.9229	22.3383	42.2612	0	0	0.659777	0.659777	0.659777	7.1
2.16833	-19.9509	-18.1939	22.3434	-19.9509	22.3434	42.2942	0	0	0.659743	0.659743	0.659743	7.1
2.16875	-19.9764	-18.194	22.3467	-19.9764	22.3467	42.3231	0	0	0.659648	0.659648	0.659648	7.1
2.16917	-19.9991	-18.1788	22.344	-19.9991	22.344	42.3431	0	0	0.659502	0.659502	0.659502	7.1
2.16958	-20.0157	-18.1576	22.3355	-20.0157	22.3355	42.3512	0	0	0.659354	0.659354	0.659354	7.1
2.17	-20.0227	-18.1416	22.3251	-20.0227	22.3251	42.3478	0	0	0.659263	0.659263	0.659263	7.08
2.17042	-20.0138	-18.1341	22.3158	-20.0138	22.3158	42.3296	0	0	0.659266	0.659266	0.659266	7.08
2.17083	-19.9906	-18.1292	22.3111	-19.9906	22.3111	42.3017	0	0	0.659333	0.659333	0.659333	7.08
2.17125	-19.9604	-18.1255	22.3127	-19.9604	22.3127	42.273	0	0	0.659433	0.659433	0.659433	7.1
2.17167	-19.9343	-18.125	22.3171	-19.9343	22.3171	42.2514	0	0	0.65953	0.65953	0.65953	7.1
2.17208	-19.9196	-18.1254	22.32	-19.9196	22.32	42.2396	0	0	0.659587	0.659587	0.659587	7.1
2.1725	-19.9188	-18.1205	22.3217	-19.9188	22.3217	42.2405	0	0	0.659571	0.659571	0.659571	7.1
2.17292	-19.937	-18.109	22.3255	-19.937	22.3255	42.2625	0	0	0.659458	0.659458	0.659458	7.1
2.17333	-19.9692	-18.0986	22.3313	-19.9692	22.3313	42.3006	0	0	0.659296	0.659296	0.659296	7.08
2.17375	-20.0014	-18.0939	22.3359	-20.0014	22.3359	42.3373	0	0	0.659158	0.659158	0.659158	7.08
2.17417	-20.0219	-18.0942	22.3387	-20.0219	22.3387	42.3607	0	0	0.659082	0.659082	0.659082	7.08
2.17458	-20.032	-18.0985	22.3432	-20.032	22.3432	42.3752	0	0	0.659062	0.659062	0.659062	7.08
2.175	-20.0339	-18.1057	22.3483	-20.0339	22.3483	42.3822	0	0	0.659084	0.659084	0.659084	7.08
2.17542	-20.0209	-18.1184	22.3498	-20.0209	22.3498	42.3706	0	0	0.659183	0.659183	0.659183	7.08
2.17583	-19.9999	-18.1321	22.3458	-19.9999	22.3458	42.3457	0	0	0.659315	0.659315	0.659315	7.08
2.17625	-19.9889	-18.1373	22.3385	-19.9889	22.3385	42.3274	0	0	0.659376	0.659376	0.659376	7.1
2.17667	-20	-18.1327	22.3315	-20	22.3315	42.3315	0	0	0.659315	0.659315	0.659315	7.08
2.17708	-20.0213	-18.1264	22.3245	-20.0213	22.3245	42.3458	0	0	0.659209	0.659209	0.659209	7.08
2.1775	-20.0361	-18.1248	22.3182	-20.0361	22.3182	42.3543	0	0	0.659145	0.659145	0.659145	7.08
2.17792	-20.0518	-18.1203	22.313	-20.0518	22.313	42.3648	0	0	0.659068	0.659068	0.659068	7.08
2.17833	-20.0763	-18.1087	22.3069	-20.0763	22.3069	42.3832	0	0	0.658929	0.658929	0.658929	7.08
2.17875	-20.1012	-18.0988	22.2987	-20.1012	22.2987	42.4	0	0	0.658795	0.658795	0.658795	7.06
2.17917	-20.1056	-18.0981	22.2895	-20.1056	22.2895	42.3951	0	0	0.658775	0.658775	0.658775	7.06
2.17958	-20.0812	-18.1002	22.2829	-20.0812	22.2829	42.3642	0	0	0.658873	0.658873	0.658873	7.08
2.18	-20.0439	-18.0966	22.2804	-20.0439	22.2804	42.3242	0	0	0.658999	0.658999	0.658999	7.08
2.18042	-20.0076	-18.091	22.2811	-20.0076	22.2811	42.2887	0	0	0.659113	0.659113	0.659113	7.08
2.18083	-19.976	-18.0922	22.2845	-19.976	22.2845	42.2605	0	0	0.659238	0.659238	0.659238	7.08
2.18125	-19.9521	-18.1007	22.2896	-19.9521	22.2896	42.2417	0	0	0.659362	0.659362	0.659362	7.1
2.18167	-19.942	-18.1091	22.2982	-19.942	22.2982	42.2402	0	0	0.659435	0.659435	0.659435	7.1
2.18208	-19.9502	-18.116	22.3106	-19.9502	22.3106	42.2607	0	0	0.659433	0.659433	0.659433	7.1
2.1825	-19.9657	-18.1288	22.3236	-19.9657	22.3236	42.2893	0	0	0.659427	0.659427	0.659427	7.1
2.18292	-19.9743	-18.1487	22.333	-19.9743	22.333	42.3073	0	0	0.659475	0.659475	0.659475	7.1
2.18333	-19.9764	-18.1654	22.3373	-19.9764	22.3373	42.3138	0	0	0.659533	0.659533	0.659533	7.1
2.18375	-19.9715	-18.1696	22.3406	-19.9715	22.3406	42.3122	0	0	0.659569	0.659569	0.659569	7.1
2.18417	-19.9516	-18.165	22.3424	-19.9516	22.3424	42.294	0	0	0.659626	0.659626	0.659626	7.1
2.18458	-19.9164	-18.1602	22.3388	-19.9164	22.3388	42.2552	0	0	0.65974	0.65974	0.65974	7.1
2.185	-19.8825	-18.1509	22.3307	-19.8825	22.3307	42.2133	0	0	0.65983	0.65983	0.65983	7.1
2.18542	-19.8681	-18.1323	22.3228	-19.8681	22.3228	42.1909	0	0	0.65981	0.65981	0.65981	7.1
2.18583	-19.867	-18.1105	22.3195	-19.867	22.3195	42.1865	0	0	0.659727	0.659727	0.659727	7.1
2.18625	-19.8706	-18.0947	22.3178	-19.8706	22.3178	42.1884	0	0	0.659651	0.659651	0.659651	7.1
2.18667	-19.8858	-18.0867	22.3132	-19.8858	22.3132	42.1989	0	0	0.659561	0.659561	0.659561	7.1
2.18708	-19.9152	-18.0808	22.3073	-19.9152	22.3073	42.2226	0	0	0.659426	0.659426	0.659426	7.1
2.1875	-19.9504	-18.0753	22.3025	-19.9504	22.3025	42.2529	0	0	0.65927	0.65927	0.65927	7.08
2.18792	-19.9733	-18.0716	22.3002	-19.9733	22.3002	42.2734	0	0	0.659169	0.659169	0.659169	7.08
2.18833	-19.98	-18.0743	22.2976	-19.98	22.2976	42.2776	0	0	0.659154	0.659154	0.659154	7.08
2.18875	-19.9756	-18.086	22.2959	-19.9756	22.2959	42.2715	0	0	0.659217	0.659217	0.659217	7.08
2.18917	-19.9626	-18.1003	22.3012	-19.9626	22.3012	42.2638	0	0	0.659323	0.659323	0.659323	7.08
2.18958	-19.9472	-18.1077	22.3142	-19.9472	22.3142	42.2614	0	0	0.659412	0.659412	0.659412	7.1
2.19	-19.9284	-18.1078	22.3318	-19.9284	22.3318	42.2603	0	0	0.659486	0.659486	0.659486	7.1
2.19042	-19.9038	-18.108	22.3476	-19.9038	22.3476	42.2514	0	0	0.659583	0.659583	0.659583	7.1
2.19083	-19.8773	-18.1109	22.357	-19.8773	22.357	42.2342	0	0	0.659696	0.659696	0.659696	7.1
2.19125	-19.8562	-18.1118	22.3601	-19.8562	22.3601	42.2163	0	0	0.65978	0.65978	0.65978	7.1
2.19167	-19.8449	-18.1083	22.3601	-19.8449	22.3601	42.205	0	0	0.659809	0.659809	0.659809	7.1
2.19208	-19.8374	-18.1009	22.3572	-19.8374	22.3572	42.1946	0	0	0.659808	0.659808	0.659808	7.1
2.1925	-19.8294	-18.0902	22.3491	-19.8294	22.3491	42.1786	0	0	0.659794	0.659794	0.659794	7.1
2.19292	-19.8279	-18.0726	22.3366	-19.8279	22.3366	42.1645	0	0	0.659728	0.659728	0.659728	7.1
2.19333	-19.8366	-18.048	22.3252	-19.8366	22.3252	42.1618	0	0	0.659596	0.659596	0.659596	7.1
2.19375	-19.8513	-18.0238	22.3165	-19.8513	22.3165	42.1678	0	0	0.659443	0.659443	0.659443	7.1
2.19417	-19.865	-18.0091	22.3057	-19.865	22.3057	42.1707	0	0	0.659332	0.659332	0.659332	7.08
2.19458	-19.8722	-18.0077	22.2924	-19.8722	22.2924	42.1646	0	0	0.659297	0.659297	0.659297	7.08
2.195	-19.8721	-18.0133	22.2813	-19.8721	22.2813	42.1534	0	0	0.659317	0.659317	0.659317	7.08
2.19542	-19.8681	-18.0226	22.2772	-19.8681	22.2772	42.1453	0	0	0.659369	0.659369	0.659369	7.1
2.19583	-19.8628	-18.0331	22.2803	-19.8628	22.2803	42.143	0	0	0.659431	0.659431	0.659431	7.1
2.19625	-19.8561	-18.0396	22.2888	-19.8561	22.2888	42.1449	0	0	0.659483	0.659483	0.659483	7.1
2.19667	-19.8429	-18.0373	22.3002	-19.8429	22.3002	42.1431	0	0	0.659526	0.659526	0.659526	7.1
2.19708	-19.8206	-18.0295	22.3105	-19.8206	22.3105	42.1311	0	0	0.659581	0.659581	0.659581	7.1
2.1975	-19.7987	-18.0259	22.3171	-19.7987	22.3171	42.1159	0	0	0.659651	0.659651	0.659651	7.1
2.19792	-19.7841	-18.0272	22.3192	-19.7841	22.3192	42.1034	0	0	0.659712	0.659712	0.659712	7.1
2.19833	-19.7775	-18.0324	22.3162	-19.7775	22.3162	42.0936	0	0	0.659757	0.659757	0.659757	7.1
2.19875	-19.7747	-18.0425	22.3099	-19.7747	22.3099	42.0846	0	0	0.659807	0.659807	0.659807	7.1
2.19917	-19.7764	-18.0547	22.305	-19.7764	22.305	42.0814	0	0	0.659848	0.659848	0.659848	7.1
2.19958	-19.791	-18.0619	22.3058	-19.791	22.3058	42.0968	0	0	0.659821	0.659821	0.659821	7.1
2.2	-19.8119	-18.0629	22.3118	-19.8119	22.3118	42.1237	0	0	0.659747	0.659747	0.659747	7.1
2.20042	-19.8262	-18.0652	22.3209	-19.8262	22.3209	42.1471	0	0	0.659703	0.659703	0.659703	7.1
2.20083	-19.8246	-18.0666	22.3326	-19.8246	22.3326	42.1572	0	0	0.659717	0.659717	0.659717	7.1
2.20125	-19.8119	-18.0536	22.3428	-19.8119	22.3428	42.1547	0	0	0.659715	0.659715	0.659715	7.1
2.20167	-19.8069	-18.0267	22.3461	-19.8069	22.3461	42.153	0	0	0.659628	0.659628	0.659628	7.1
2.20208	-19.8182	-18.0024	22.3389	-19.8182	22.3389	42.1572	0	0	0.659488	0.659488	0.659488	7.1
2.2025	-19.8488	-17.9899	22.3251	-19.8488	22.3251	42.1738	0	0	0.659321	0.659321	0.659321	7.08
2.20292	-19.8882	-17.9808	22.3118	-19.8882	22.3118	42.2	0	0	0.659133	0.659133	0.659133	7.08
2.20333	-19.9294	-17.9725	22.302	-19.9294	22.302	42.2314	0	0	0.658944	0.658944	0.658944	7.08
2.20375	-19.9678	-17.9807	22.2973	-19.9678	22.2973	42.2652	0	0	0.658831	0.658831	0.658831	7.06
2.20417	-19.9943	-18.0123	22.2991	-19.9943	22.2991	42.2934	0	0	0.658856	0.658856	0.658856	7.08
2.20458	-20.0061	-18.052	22.3074	-20.0061	22.3074	42.3136	0	0	0.65897	0.65897	0.65897	7.08
2.205	-20.0049	-18.0749	22.3206	-20.0049	22.3206	42.3255	0	0	0.659067	0.659067	0.659067	7.08
2.20542	-20.0012	-18.0796	22.3316	-20.0012	22.3316	42.3328	0	0	0.659101	0.659101	0.659101	7.08
2.20583	-19.9987	-18.0818	22.3369	-19.9987	22.3369	42.3355	0	0	0.65912	0.65912	0.65912	7.08
2.20625	-19.9982	-18.0886	22.3374	-19.9982	22.3374	42.3356	0	0	0.659149	0.659149	0.659149	7.08
2.20667	-19.9998	-18.0946	22.3374	-19.9998	22.3374	42.3372	0	0	0.659166	0.659166	0.659166	7.08
2.20708	-19.9936	-18.0919	22.3419	-19.9936	22.3419	42.3354	0	0	0.65918	0.65918	0.65918	7.08
2.2075	-19.968	-18.0914	22.3479	-19.968	22.3479	42.3159	0	0	0.659275	0.659275	0.659275	7.08
2.20792	-19.9223	-18.1042	22.3499	-19.9223	22.3499	42.2722	0	0	0.659498	0.659498	0.659498	7.1
2.20833	-19.8765	-18.1197	22.3449	-19.8765	22.3449	42.2214	0	0	0.659732	0.659732	0.659732	7.1
2.20875	-19.8478	-18.1191	22.3355	-19.8478	22.3355	42.1833	0	0	0.659836	0.659836	0.659836	7.1
2.20917	-19.838	-18.0963	22.3255	-19.838	22.3255	42.1636	0	0	0.659782	0.659782	0.659782	7.1
2.20958	-19.8423	-18.0658	22.3126	-19.8423	22.3126	42.1549	0	0	0.659643	0.659643	0.659643	7.1
2.21	-19.8555	-18.0412	22.2953	-19.8555	22.2953	42.1509	0	0	0.659493	0.659493	0.659493	7.1
2.21042	-19.8753	-18.0244	22.2774	-19.8753	22.2774	42.1527	0	0	0.659348	0.659348	0.659348	7.08
2.21083	-19.896	-18.0165	22.2664	-19.896	22.2664	42.1623	0	0	0.659237	0.659237	0.659237	7.08
2.21125	-19.9101	-18.0191	22.2659	-19.9101	22.2659	42.176	0	0	0.659194	0.659194	0.659194	7.08
2.21167	-19.91	-18.0263	22.2725	-19.91	22.2725	42.1825	0	0	0.659224	0.659224	0.659224	7.08
2.21208	-19.8963	-18.0309	22.2815	-19.8963	22.2815	42.1778	0	0	0.659296	0.659296	0.659296	7.08
2.2125	-19.884	-18.0325	22.2901	-19.884	22.2901	42.1741	0	0	0.65935	0.65935	0.65935	7.08
2.21292	-19.8871	-18.0329	22.2984	-19.8871	22.2984	42.1855	0	0	0.659341	0.659341	0.659341	7.08
2.21333	-19.8958	-18.0317	22.3041	-19.8958	22.3041	42.1999	0	0	0.659304	0.659304	0.659304	7.08
2.21375	-19.892	-18.0261	22.305	-19.892	22.305	42.197	0	0	0.659297	0.659297	0.659297	7.08
2.21417	-19.8733	-18.0218	22.3029	-19.8733	22.3029	42.1762	0	0	0.65935	0.65935	0.65935	7.08
2.21458	-19.8539	-18.0263	22.3012	-19.8539	22.3012	42.155	0	0	0.659441	0.659441	0.659441	7.1
2.215	-19.8456	-18.0336	22.3033	-19.8456	22.3033	42.1489	0	0	0.659501	0.659501	0.659501	7.1
2.21542	-19.8429	-18.0351	22.3112	-19.8429	22.3112	42.1541	0	0	0.659519	0.659519	0.659519	7.1
2.21583	-19.8387	-18.0309	22.3255	-19.8387	22.3255	42.1642	0	0	0.659521	0.659521	0.659521	7.1
2.21625	-19.8354	-18.0297	22.3419	-19.8354	22.3419	42.1773	0	0	0.659532	0.659532	0.659532	7.1
2.21667	-19.8427	-18.0354	22.354	-19.8427	22.354	42.1967	0	0	0.659528	0.659528	0.659528	7.1
2.21708	-19.865	-18.0428	22.3595	-19.865	22.3595	42.2245	0	0	0.659474	0.659474	0.659474	7.1
2.2175	-19.8903	-18.0471	22.3604	-19.8903	22.3604	42.2507	0	0	0.659396	0.659396	0.659396	7.1
2.21792	-19.904	-18.0457	22.3585	-19.904	22.3585	42.2625	0	0	0.659338	0.659338	0.659338	7.08
2.21833	-19.9024	-18.0386	22.3526	-19.9024	22.3526	42.2551	0	0	0.659315	0.659315	0.659315	7.08
2.21875	-19.8952	-18.0281	22.3412	-19.8952	22.3412	42.2364	0	0	0.659299	0.659299	0.659299	7.08
2.21917	-19.8923	-18.0176	22.3259	-19.8923	22.3259	42.2181	0	0	0.659266	0.659266	0.659266	7.08
2.21958	-19.8954	-18.0063	22.3124	-19.8954	22.3124	42.2079	0	0	0.659207	0.659207	0.659207	7.08
2.22	-19.8983	-17.9954	22.306	-19.8983	22.306	42.2043	0	0	0.659152	0.659152	0.659152	7.08
2.22042	-19.897	-17.9904	22.3041	-19.897	22.3041	42.2011	0	0	0.659137	0.659137	0.659137	7.08
2.22083	-19.8945	-17.9932	22.3042	-19.8945	22.3042	42.1987	0	0	0.659158	0.659158	0.659158	7.08
2.22125	-19.8924	-18	22.3099	-19.8924	22.3099	42.2023	0	0	0.659193	0.659193	0.659193	7.08
2.22167	-19.8898	-18.0087	22.3238	-19.8898	22.3238	42.2136	0	0	0.65924	0.65924	0.65924	7.08
2.22208	-19.8781	-18.0235	22.341	-19.8781	22.341	42.2191	0	0	0.659345	0.659345	0.659345	7.08
2.2225	-19.8516	-18.0461	22.3546	-19.8516	22.3546	42.2062	0	0	0.659537	0.659537	0.659537	7.1
2.22292	-19.8258	-18.0748	22.3645	-19.8258	22.3645	42.1903	0	0	0.659749	0.659749	0.659749	7.1
2.22333	-19.8241	-18.1072	22.3735	-19.8241	22.3735	42.1976	0	0	0.659886	0.659886	0.659886	7.12
2.22375	-19.8458	-18.1379	22.3799	-19.8458	22.3799	42.2257	0	0	0.659925	0.659925	0.659925	7.12
2.22417	-19.868	-18.1584	22.3836	-19.868	22.3836	42.2516	0	0	0.659923	0.659923	0.659923	7.12
2.22458	-19.8818	-18.1675	22.3874	-19.8818	22.3874	42.2692	0	0	0.659907	0.659907	0.659907	7.12
2.225	-19.9065	-18.176	22.3926	-19.9065	22.3926	42.2991	0	0	0.659848	0.659848	0.659848	7.1
2.22542	-19.9497	-18.1872	22.3989	-19.9497	22.3989	42.3486	0	0	0.65973	0.65973	0.65973	7.1
2.22583	-19.9937	-18.1941	22.4052	-19.9937	22.4052	42.3989	0	0	0.659592	0.659592	0.659592	7.1
2.22625	-20.0273	-18.1957	22.4121	-20.0273	22.4121	42.4394	0	0	0.659474	0.659474	0.659474	7.1
2.22667	-20.0499	-18.1981	22.4198	-20.0499	22.4198	42.4697	0	0	0.6594	0.6594	0.6594	7.1
2.22708	-20.0631	-18.2036	22.4287	-20.0631	22.4287	42.4918	0	0	0.659373	0.659373	0.659373	7.1
2.2275	-20.0686	-18.2034	22.441	-20.0686	22.441	42.5095	0	0	0.659354	0.659354	0.659354	7.1
2.22792	-20.066	-18.1934	22.4564	-20.066	22.4564	42.5224	0	0	0.659327	0.659327	0.659327	7.08
2.22833	-20.0546	-18.1788	22.4722	-20.0546	22.4722	42.5268	0	0	0.659315	0.659315	0.659315	7.08
2.22875	-20.0354	-18.162	22.4835	-20.0354	22.4835	42.5189	0	0	0.659323	0.659323	0.659323	7.08
2.22917	-20.0239	-18.1445	22.4866	-20.0239	22.4866	42.5106	0	0	0.659298	0.659298	0.659298	7.08
2.22958	-20.039	-18.134	22.4827	-20.039	22.4827	42.5217	0	0	0.6592	0.6592	0.6592	7.08
2.23	-20.0691	-18.1369	22.476	-20.0691	22.476	42.5451	0	0	0.659098	0.659098	0.659098	7.08
2.23042	-20.092	-18.1525	22.471	-20.092	22.471	42.563	0	0	0.659072	0.659072	0.659072	7.08
2.23083	-20.1031	-18.1746	22.4676	-20.1031	22.4676	42.5708	0	0	0.659116	0.659116	0.659116	7.08
2.23125	-20.1107	-18.1961	22.4654	-20.1107	22.4654	42.5761	0	0	0.659172	0.659172	0.659172	7.08
2.23167	-20.1121	-18.2134	22.4665	-20.1121	22.4665	42.5787	0	0	0.659234	0.659234	0.659234	7.08
2.23208	-20.0944	-18.2201	22.4707	-20.0944	22.4707	42.565	0	0	0.659328	0.659328	0.659328	7.08
2.2325	-20.0623	-18.2139	22.4748	-20.0623	22.4748	42.5371	0	0	0.659424	0.659424	0.659424	7.1
2.23292	-20.0334	-18.1966	22.474	-20.0334	22.474	42.5074	0	0	0.659465	0.659465	0.659465	7.1
2.23333	-20.0122	-18.1749	22.4687	-20.0122	22.4687	42.4808	0	0	0.659458	0.659458	0.659458	7.1
2.23375	-19.994	-18.1642	22.463	-19.994	22.463	42.457	0	0	0.659484	0.659484	0.659484	7.1
2.23417	-19.9814	-18.1675	22.4591	-19.9814	22.4591	42.4405	0	0	0.659543	0.659543	0.659543	7.1
2.23458	-19.9786	-18.1745	22.4562	-19.9786	22.4562	42.4349	0	0	0.659581	0.659581	0.659581	7.1
2.235	-19.9842	-18.1753	22.4532	-19.9842	22.4532	42.4374	0	0	0.659562	0.659562	0.659562	7.1
2.23542	-19.9903	-18.1702	22.4534	-19.9903	22.4534	42.4436	0	0	0.65952	0.65952	0.65952	7.1
2.23583	-19.9956	-18.1645	22.4573	-19.9956	22.4573	42.4529	0	0	0.659478	0.659478	0.659478	7.1
2.23625	-20.0081	-18.1598	22.4617	-20.0081	22.4617	42.4698	0	0	0.659413	0.659413	0.659413	7.1
2.23667	-20.0268	-18.1614	22.465	-20.0268	22.465	42.4918	0	0	0.65935	0.65935	0.65935	7.08
2.23708	-20.0485	-18.1733	22.4675	-20.0485	22.4675	42.516	0	0	0.659316	0.659316	0.659316	7.08
2.2375	-20.0711	-18.1905	22.4694	-20.0711	22.4694	42.5404	0	0	0.659299	0.659299	0.659299	7.08
2.23792	-20.0938	-18.2076	22.4691	-20.0938	22.4691	42.563	0	0	0.65928	0.65928	0.65928	7.08
2.23833	-20.1187	-18.221	22.4678	-20.1187	22.4678	42.5865	0	0	0.65924	0.65924	0.65924	7.08
2.23875	-20.1393	-18.2272	22.4668	-20.1393	22.4668	42.6061	0	0	0.659187	0.659187	0.659187	7.08
2.23917	-20.1509	-18.2254	22.4636	-20.1509	22.4636	42.6145	0	0	0.659136	0.659136	0.659136	7.08
2.23958	-20.1483	-18.2219	22.457	-20.1483	22.457	42.6053	0	0	0.659131	0.659131	0.659131	7.08
2.24	-20.1313	-18.2241	22.4485	-20.1313	22.4485	42.5798	0	0	0.659202	0.659202	0.659202	7.08
2.24042	-20.1152	-18.2306	22.4421	-20.1152	22.4421	42.5573	0	0	0.659286	0.659286	0.659286	7.08
2.24083	-20.1122	-18.239	22.4397	-20.1122	22.4397	42.552	0	0	0.65933	0.65933	0.65933	7.08
2.24125	-20.124	-18.25	22.4415	-20.124	22.4415	42.5655	0	0	0.659329	0.659329	0.659329	7.08
2.24167	-20.142	-18.2627	22.4458	-20.142	22.4458	42.5878	0	0	0.659312	0.659312	0.659312	7.08
2.24208	-20.1613	-18.2731	22.4492	-20.1613	22.4492	42.6106	0	0	0.659281	0.659281	0.659281	7.08
2.2425	-20.1825	-18.28	22.4491	-20.1825	22.4491	42.6316	0	0	0.659229	0.659229	0.659229	7.08
2.24292	-20.2064	-18.2876	22.4439	-20.2064	22.4439	42.6503	0	0	0.659168	0.659168	0.659168	7.08
2.24333	-20.2308	-18.2985	22.4338	-20.2308	22.4338	42.6646	0	0	0.659118	0.659118	0.659118	7.08
2.24375	-20.2438	-18.3092	22.4207	-20.2438	22.4207	42.6644	0	0	0.659109	0.659109	0.659109	7.08
2.24417	-20.2409	-18.3139	22.4062	-20.2409	22.4062	42.6471	0	0	0.659136	0.659136	0.659136	7.08
2.24458	-20.234	-18.3122	22.3931	-20.234	22.3931	42.6271	0	0	0.659153	0.659153	0.659153	7.08
2.245	-20.2424	-18.3136	22.384	-20.2424	22.384	42.6264	0	0	0.659125	0.659125	0.659125	7.08
2.24542	-20.262	-18.324	22.3797	-20.262	22.3797	42.6417	0	0	0.659092	0.659092	0.659092	7.08
2.24583	-20.2677	-18.3354	22.378	-20.2677	22.378	42.6457	0	0	0.659115	0.659115	0.659115	7.08
2.24625	-20.2566	-18.3405	22.3775	-20.2566	22.3775	42.634	0	0	0.659176	0.659176	0.659176	7.08
2.24667	-20.2457	-18.3397	22.3795	-20.2457	22.3795	42.6252	0	0	0.659214	0.659214	0.659214	7.08
2.24708	-20.2434	-18.3369	22.385	-20.2434	22.385	42.6284	0	0	0.659213	0.659213	0.659213	7.08
2.2475	-20.2344	-18.3294	22.3905	-20.2344	22.3905	42.6249	0	0	0.659218	0.659218	0.659218	7.08
2.24792	-20.2019	-18.314	22.3929	-20.2019	22.3929	42.5949	0	0	0.659279	0.659279	0.659279	7.08
2.24833	-20.1592	-18.2984	22.3941	-20.1592	22.3941	42.5533	0	0	0.659378	0.659378	0.659378	7.1
2.24875	-20.127	-18.2927	22.3952	-20.127	22.3952	42.5222	0	0	0.659477	0.659477	0.659477	7.1
2.24917	-20.1137	-18.2988	22.3917	-20.1137	22.3917	42.5054	0	0	0.659551	0.659551	0.659551	7.1
2.24958	-20.1162	-18.3117	22.3797	-20.1162	22.3797	42.496	0	0	0.65959	0.65959	0.65959	7.1
2.25	-20.1268	-18.3277	22.3626	-20.1268	22.3626	42.4894	0	0	0.65961	0.65961	0.65961	7.1
2.25042	-20.1417	-18.3475	22.3462	-20.1417	22.3462	42.4879	0	0	0.659629	0.659629	0.659629	7.1
2.25083	-20.156	-18.3695	22.3321	-20.156	22.3321	42.488	0	0	0.659659	0.659659	0.659659	7.1
2.25125	-20.1702	-18.386	22.3193	-20.1702	22.3193	42.4894	0	0	0.659668	0.659668	0.659668	7.1
2.25167	-20.1883	-18.3971	22.3109	-20.1883	22.3109	42.4992	0	0	0.659642	0.659642	0.659642	7.1
2.25208	-20.2037	-18.4084	22.3125	-20.2037	22.3125	42.5162	0	0	0.659629	0.659629	0.659629	7.1
2.2525	-20.2087	-18.42	22.3211	-20.2087	22.3211	42.5298	0	0	0.659657	0.659657	0.659657	7.1
2.25292	-20.2092	-18.4268	22.3275	-20.2092	22.3275	42.5367	0	0	0.659683	0.659683	0.659683	7.1
2.25333	-20.2162	-18.4286	22.3267	-20.2162	22.3267	42.543	0	0	0.659663	0.659663	0.659663	7.1
2.25375	-20.2248	-18.4367	22.322	-20.2248	22.322	42.5468	0	0	0.659662	0.659662	0.659662	7.1
2.25417	-20.2218	-18.453	22.3156	-20.2218	22.3156	42.5374	0	0	0.659736	0.659736	0.659736	7.1
2.25458	-20.2114	-18.4682	22.3038	-20.2114	22.3038	42.5152	0	0	0.659833	0.659833	0.659833	7.1
2.255	-20.2044	-18.4774	22.2871	-20.2044	22.2871	42.4915	0	0	0.659893	0.659893	0.659893	7.12
2.25542	-20.2042	-18.4825	22.2708	-20.2042	22.2708	42.475	0	0	0.659911	0.659911	0.659911	7.12
2.25583	-20.2149	-18.4887	22.2557	-20.2149	22.2557	42.4706	0	0	0.659893	0.659893	0.659893	7.12
2.25625	-20.2382	-18.4933	22.2377	-20.2382	22.2377	42.4758	0	0	0.65982	0.65982	0.65982	7.1
2.25667	-20.2606	-18.4921	22.2172	-20.2606	22.2172	42.4779	0	0	0.659728	0.659728	0.659728	7.1
2.25708	-20.2664	-18.4901	22.2005	-20.2664	22.2005	42.4669	0	0	0.659695	0.659695	0.659695	7.1
2.2575	-20.2664	-18.4927	22.1886	-20.2664	22.1886	42.455	0	0	0.659704	0.659704	0.659704	7.1
2.25792	-20.2755	-18.5037	22.1793	-20.2755	22.1793	42.4547	0	0	0.659711	0.659711	0.659711	7.1
2.25833	-20.2797	-18.5223	22.1716	-20.2797	22.1716	42.4512	0	0	0.659767	0.659767	0.659767	7.1
2.25875	-20.2679	-18.5419	22.1664	-20.2679	22.1664	42.4343	0	0	0.659887	0.659887	0.659887	7.12
2.25917	-20.2593	-18.5606	22.1617	-20.2593	22.1617	42.421	0	0	0.659993	0.659993	0.659993	7.12
2.25958	-20.2726	-18.5771	22.1528	-20.2726	22.1528	42.4254	0	0	0.660006	0.660006	0.660006	7.12
2.26	-20.2975	-18.5883	22.1405	-20.2975	22.1405	42.4379	0	0	0.659954	0.659954	0.659954	7.12
2.26042	-20.3234	-18.5924	22.1277	-20.3234	22.1277	42.4511	0	0	0.65987	0.65987	0.65987	7.12
2.26083	-20.3552	-18.5866	22.1162	-20.3552	22.1162	42.4713	0	0	0.659726	0.659726	0.659726	7.1
2.26125	-20.3891	-18.5764	22.1054	-20.3891	22.1054	42.4945	0	0	0.659557	0.659557	0.659557	7.1
2.26167	-20.4174	-18.57	22.0932	-20.4174	22.0932	42.5106	0	0	0.659424	0.659424	0.659424	7.1
2.26208	-20.444	-18.5717	22.0811	-20.444	22.0811	42.5252	0	0	0.659328	0.659328	0.659328	7.08
2.2625	-20.4725	-18.5845	22.0699	-20.4725	22.0699	42.5424	0	0	0.65927	0.65927	0.65927	7.08
2.26292	-20.4914	-18.6029	22.0596	-20.4914	22.0596	42.5511	0	0	0.65927	0.65927	0.65927	7.08
2.26333	-20.5001	-18.6184	22.0502	-20.5001	22.0502	42.5502	0	0	0.659296	0.659296	0.659296	7.08
2.26375	-20.5159	-18.6298	22.0415	-20.5159	22.0415	42.5574	0	0	0.65928	0.65928	0.65928	7.08
2.26417	-20.5419	-18.6388	22.0342	-20.5419	22.0342	42.5761	0	0	0.659217	0.659217	0.659217	7.08
2.26458	-20.5605	-18.649	22.0269	-20.5605	22.0269	42.5874	0	0	0.659186	0.659186	0.659186	7.08
2.265	-20.5667	-18.6584	22.0187	-20.5667	22.0187	42.5854	0	0	0.659198	0.659198	0.659198	7.08
2.26542	-20.5727	-18.6662	22.0111	-20.5727	22.0111	42.5838	0	0	0.659205	0.659205	0.659205	7.08
2.26583	-20.5821	-18.6774	22.004	-20.5821	22.004	42.5861	0	0	0.659212	0.659212	0.659212	7.08
2.26625	-20.5884	-18.6952	21.9946	-20.5884	21.9946	42.583	0	0	0.659257	0.659257	0.659257	7.08
2.26667	-20.5906	-18.7179	21.9817	-20.5906	21.9817	42.5723	0	0	0.659335	0.659335	0.659335	7.08
2.26708	-20.5949	-18.7363	21.9679	-20.5949	21.9679	42.5628	0	0	0.659389	0.659389	0.659389	7.1
2.2675	-20.6036	-18.7471	21.9534	-20.6036	21.9534	42.557	0	0	0.659396	0.659396	0.659396	7.1
2.26792	-20.6123	-18.7576	21.9356	-20.6123	21.9356	42.5479	0	0	0.659402	0.659402	0.659402	7.1
2.26833	-20.622	-18.7738	21.9146	-20.622	21.9146	42.5366	0	0	0.659425	0.659425	0.659425	7.1
2.26875	-20.6368	-18.7908	21.8955	-20.6368	21.8955	42.5323	0	0	0.659433	0.659433	0.659433	7.1
2.26917	-20.6573	-18.8006	21.8811	-20.6573	21.8811	42.5384	0	0	0.659392	0.659392	0.659392	7.1
2.26958	-20.6836	-18.8054	21.8675	-20.6836	21.8675	42.551	0	0	0.65931	0.65931	0.65931	7.08
2.27	-20.7083	-18.8147	21.85	-20.7083	21.85	42.5582	0	0	0.659251	0.659251	0.659251	7.08
2.27042	-20.7263	-18.828	21.83	-20.7263	21.83	42.5563	0	0	0.659232	0.659232	0.659232	7.08
2.27083	-20.7386	-18.8387	21.8108	-20.7386	21.8108	42.5493	0	0	0.659225	0.659225	0.659225	7.08
2.27125	-20.7419	-18.845	21.7941	-20.7419	21.7941	42.536	0	0	0.659234	0.659234	0.659234	7.08
2.27167	-20.7345	-18.8551	21.7799	-20.7345	21.7799	42.5144	0	0	0.659299	0.659299	0.659299	7.08
2.27208	-20.7167	-18.8748	21.7671	-20.7167	21.7671	42.4837	0	0	0.659441	0.659441	0.659441	7.1
2.2725	-20.7046	-18.8993	21.7558	-20.7046	21.7558	42.4604	0	0	0.65958	0.65958	0.65958	7.1
2.27292	-20.7128	-18.9262	21.7438	-20.7128	21.7438	42.4566	0	0	0.659653	0.659653	0.659653	7.1
2.27333	-20.7336	-18.9569	21.7293	-20.7336	21.7293	42.4629	0	0	0.659693	0.659693	0.659693	7.1
2.27375	-20.7604	-18.9887	21.7112	-20.7604	21.7112	42.4716	0	0	0.659714	0.659714	0.659714	7.1
2.27417	-20.7957	-19.012	21.6918	-20.7957	21.6918	42.4874	0	0	0.65967	0.65967	0.65967	7.1
2.27458	-20.8433	-19.0273	21.6744	-20.8433	21.6744	42.5177	0	0	0.659548	0.659548	0.659548	7.1
2.275	-20.8972	-19.0431	21.6589	-20.8972	21.6589	42.556	0	0	0.659405	0.659405	0.659405	7.1
2.27542	-20.9479	-19.0602	21.6468	-20.9479	21.6468	42.5947	0	0	0.659281	0.659281	0.659281	7.08
2.27583	-20.9937	-19.0698	21.6379	-20.9937	21.6379	42.6316	0	0	0.659145	0.659145	0.659145	7.08
2.27625	-21.0359	-19.0716	21.6271	-21.0359	21.6271	42.663	0	0	0.658993	0.658993	0.658993	7.08
2.27667	-21.0728	-19.0762	21.6091	-21.0728	21.6091	42.682	0	0	0.65887	0.65887	0.65887	7.08
2.27708	-21.1025	-19.0828	21.5866	-21.1025	21.5866	42.6891	0	0	0.658781	0.658781	0.658781	7.06
2.2775	-21.1206	-19.0847	21.568	-21.1206	21.568	42.6886	0	0	0.658718	0.658718	0.658718	7.06
2.27792	-21.1239	-19.0789	21.5543	-21.1239	21.5543	42.6782	0	0	0.658681	0.658681	0.658681	7.06
2.27833	-21.1142	-19.075	21.542	-21.1142	21.542	42.6562	0	0	0.658699	0.658699	0.658699	7.06
2.27875	-21.1003	-19.0844	21.5319	-21.1003	21.5319	42.6323	0	0	0.658786	0.658786	0.658786	7.06
2.27917	-21.09	-19.1096	21.5262	-21.09	21.5262	42.6163	0	0	0.658921	0.658921	0.658921	7.08
2.27958	-21.0813	-19.1441	21.5197	-21.0813	21.5197	42.601	0	0	0.659088	0.659088	0.659088	7.08
2.28	-21.0707	-19.1729	21.5064	-21.0707	21.5064	42.5771	0	0	0.659238	0.659238	0.659238	7.08
2.28042	-21.06	-19.1937	21.4891	-21.06	21.4891	42.5491	0	0	0.659356	0.659356	0.659356	7.1
2.28083	-21.0555	-19.2122	21.4728	-21.0555	21.4728	42.5283	0	0	0.659443	0.659443	0.659443	7.1
2.28125	-21.0532	-19.2304	21.4577	-21.0532	21.4577	42.5109	0	0	0.65952	0.65952	0.65952	7.1
2.28167	-21.0455	-19.2432	21.4418	-21.0455	21.4418	42.4874	0	0	0.659596	0.659596	0.659596	7.1
2.28208	-21.0364	-19.2485	21.4278	-21.0364	21.4278	42.4642	0	0	0.659649	0.659649	0.659649	7.1
2.2825	-21.0359	-19.2573	21.4182	-21.0359	21.4182	42.4541	0	0	0.659684	0.659684	0.659684	7.1
2.28292	-21.0492	-19.272	21.4086	-21.0492	21.4086	42.4579	0	0	0.65969	0.65969	0.65969	7.1
2.28333	-21.072	-19.2872	21.3958	-21.072	21.3958	42.4679	0	0	0.659662	0.659662	0.659662	7.1
2.28375	-21.1009	-19.2953	21.3802	-21.1009	21.3802	42.4812	0	0	0.659583	0.659583	0.659583	7.1
2.28417	-21.1299	-19.2954	21.3681	-21.1299	21.3681	42.498	0	0	0.659472	0.659472	0.659472	7.1
2.28458	-21.1537	-19.2947	21.3633	-21.1537	21.3633	42.517	0	0	0.65938	0.65938	0.65938	7.1
2.285	-21.1676	-19.2978	21.3624	-21.1676	21.3624	42.5301	0	0	0.659339	0.659339	0.659339	7.08
2.28542	-21.1667	-19.308	21.3602	-21.1667	21.3602	42.5269	0	0	0.659382	0.659382	0.659382	7.1
2.28583	-21.1592	-19.3221	21.3542	-21.1592	21.3542	42.5134	0	0	0.659464	0.659464	0.659464	7.1
2.28625	-21.1596	-19.3362	21.3465	-21.1596	21.3465	42.5062	0	0	0.659517	0.659517	0.659517	7.1
2.28667	-21.18	-19.3496	21.3354	-21.18	21.3354	42.5154	0	0	0.659491	0.659491	0.659491	7.1
2.28708	-21.2138	-19.3631	21.3179	-21.2138	21.3179	42.5317	0	0	0.659414	0.659414	0.659414	7.1
2.2875	-21.2447	-19.3765	21.2948	-21.2447	21.2948	42.5394	0	0	0.659347	0.659347	0.659347	7.08
2.28792	-21.2719	-19.3834	21.2684	-21.2719	21.2684	42.5403	0	0	0.659268	0.659268	0.659268	7.08
2.28833	-21.2952	-19.385	21.2403	-21.2952	21.2403	42.5356	0	0	0.659182	0.659182	0.659182	7.08
2.28875	-21.3059	-19.3883	21.2137	-21.3059	21.2137	42.5195	0	0	0.65915	0.65915	0.65915	7.08
2.28917	-21.3016	-19.397	21.1934	-21.3016	21.1934	42.4949	0	0	0.659197	0.659197	0.659197	7.08
2.28958	-21.2968	-19.4053	21.1786	-21.2968	21.1786	42.4754	0	0	0.659245	0.659245	0.659245	7.08
2.29	-21.3103	-19.4089	21.1646	-21.3103	21.1646	42.4749	0	0	0.659206	0.659206	0.659206	7.08
2.29042	-21.3337	-19.4168	21.1524	-21.3337	21.1524	42.4861	0	0	0.659147	0.659147	0.659147	7.08
2.29083	-21.3458	-19.4328	21.1456	-21.3458	21.1456	42.4914	0	0	0.659163	0.659163	0.659163	7.08
2.29125	-21.349	-19.4514	21.1411	-21.349	21.1411	42.4901	0	0	0.659223	0.659223	0.659223	7.08
2.29167	-21.3583	-19.4661	21.1311	-21.3583	21.1311	42.4893	0	0	0.659244	0.659244	0.659244	7.08
2.29208	-21.3694	-19.4783	21.1139	-21.3694	21.1139	42.4832	0	0	0.659248	0.659248	0.659248	7.08
2.2925	-21.3661	-19.4914	21.0966	-21.3661	21.0966	42.4627	0	0	0.659309	0.659309	0.659309	7.08
2.29292	-21.3525	-19.5017	21.0851	-21.3525	21.0851	42.4376	0	0	0.659398	0.659398	0.659398	7.1
2.29333	-21.353	-19.5094	21.0781	-21.353	21.0781	42.4311	0	0	0.659425	0.659425	0.659425	7.1
2.29375	-21.3749	-19.5186	21.0705	-21.3749	21.0705	42.4454	0	0	0.659378	0.659378	0.659378	7.1
2.29417	-21.3986	-19.5347	21.062	-21.3986	21.062	42.4606	0	0	0.65935	0.65935	0.65935	7.08
2.29458	-21.4157	-19.5551	21.056	-21.4157	21.056	42.4718	0	0	0.659365	0.659365	0.659365	7.1
2.295	-21.4348	-19.5727	21.053	-21.4348	21.053	42.4878	0	0	0.659362	0.659362	0.659362	7.1
2.29542	-21.4561	-19.5867	21.0482	-21.4561	21.0482	42.5043	0	0	0.659336	0.659336	0.659336	7.08
2.29583	-21.4645	-19.5988	21.039	-21.4645	21.039	42.5034	0	0	0.659351	0.659351	0.659351	7.1
2.29625	-21.4535	-19.6109	21.0282	-21.4535	21.0282	42.4816	0	0	0.659438	0.659438	0.659438	7.1
2.29667	-21.4398	-19.6198	21.0188	-21.4398	21.0188	42.4585	0	0	0.659523	0.659523	0.659523	7.1
2.29708	-21.4386	-19.628	21.0097	-21.4386	21.0097	42.4483	0	0	0.659558	0.659558	0.659558	7.1
2.2975	-21.4463	-19.6393	20.999	-21.4463	20.999	42.4453	0	0	0.659571	0.659571	0.659571	7.1
2.29792	-21.4589	-19.65	20.9861	-21.4589	20.9861	42.445	0	0	0.659564	0.659564	0.659564	7.1
2.29833	-21.4882	-19.6553	20.9722	-21.4882	20.9722	42.4603	0	0	0.659472	0.659472	0.659472	7.1
2.29875	-21.5374	-19.6567	20.9605	-21.5374	20.9605	42.4979	0	0	0.659291	0.659291	0.659291	7.08
2.29917	-21.5892	-19.6568	20.9524	-21.5892	20.9524	42.5416	0	0	0.659096	0.659096	0.659096	7.08
2.29958	-21.6242	-19.6561	20.9451	-21.6242	20.9451	42.5692	0	0	0.658961	0.658961	0.658961	7.08
2.3	-21.6446	-19.6591	20.9348	-21.6446	20.9348	42.5794	0	0	0.658895	0.658895	0.658895	7.08
2.30042	-21.669	-19.6721	20.923	-21.669	20.923	42.592	0	0	0.658852	0.658852	0.658852	7.08
2.30083	-21.6989	-19.6938	20.9147	-21.6989	20.9147	42.6136	0	0	0.658825	0.658825	0.658825	7.06
2.30125	-21.7218	-19.715	20.9091	-21.7218	20.9091	42.6309	0	0	0.658821	0.658821	0.658821	7.06
2.30167	-21.7295	-19.7358	20.9022	-21.7295	20.9022	42.6318	0	0	0.658872	0.658872	0.658872	7.08
2.30208	-21.7268	-19.7595	20.895	-21.7268	20.895	42.6218	0	0	0.658974	0.658974	0.658974	7.08
2.3025	-21.7287	-19.7816	20.8893	-21.7287	20.8893	42.618	0	0	0.659052	0.659052	0.659052	7.08
2.30292	-21.7363	-19.8001	20.8843	-21.7363	20.8843	42.6206	0	0	0.659095	0.659095	0.659095	7.08
2.30333	-21.745	-19.8191	20.876	-21.745	20.876	42.6209	0	0	0.659136	0.659136	0.659136	7.08
2.30375	-21.7499	-19.842	20.8624	-21.7499	20.8624	42.6122	0	0	0.659205	0.659205	0.659205	7.08
2.30417	-21.7523	-19.8619	20.8463	-21.7523	20.8463	42.5986	0	0	0.65927	0.65927	0.65927	7.08
2.30458	-21.7591	-19.8762	20.8291	-21.7591	20.8291	42.5882	0	0	0.659298	0.659298	0.659298	7.08
2.305	-21.7658	-19.8918	20.8128	-21.7658	20.8128	42.5786	0	0	0.659331	0.659331	0.659331	7.08
2.30542	-21.7661	-19.9074	20.7981	-21.7661	20.7981	42.5642	0	0	0.659389	0.659389	0.659389	7.1
2.30583	-21.7555	-19.914	20.785	-21.7555	20.785	42.5405	0	0	0.659452	0.659452	0.659452	7.1
2.30625	-21.7464	-19.9166	20.7747	-21.7464	20.7747	42.5212	0	0	0.659494	0.659494	0.659494	7.1
2.30667	-21.7562	-19.9318	20.7648	-21.7562	20.7648	42.521	0	0	0.659516	0.659516	0.659516	7.1
2.30708	-21.7808	-19.9634	20.7517	-21.7808	20.7517	42.5325	0	0	0.659545	0.659545	0.659545	7.1
2.3075	-21.8064	-19.9998	20.7338	-21.8064	20.7338	42.5402	0	0	0.659589	0.659589	0.659589	7.1
2.30792	-21.8194	-20.0263	20.7136	-21.8194	20.7136	42.5331	0	0	0.65964	0.65964	0.65964	7.1
2.30833	-21.8208	-20.0413	20.6939	-21.8208	20.6939	42.5148	0	0	0.659691	0.659691	0.659691	7.1
2.30875	-21.8167	-20.047	20.6732	-21.8167	20.6732	42.4899	0	0	0.659725	0.659725	0.659725	7.1
2.30917	-21.8058	-20.0436	20.6509	-21.8058	20.6509	42.4567	0	0	0.659749	0.659749	0.659749	7.1
2.30958	-21.789	-20.0314	20.6328	-21.789	20.6328	42.4219	0	0	0.659761	0.659761	0.659761	7.1
2.31	-21.7669	-20.0125	20.6226	-21.7669	20.6226	42.3895	0	0	0.659769	0.659769	0.659769	7.1
2.31042	-21.7481	-19.9981	20.6156	-21.7481	20.6156	42.3638	0	0	0.659782	0.659782	0.659782	7.1
2.31083	-21.7451	-19.9981	20.6039	-21.7451	20.6039	42.349	0	0	0.659791	0.659791	0.659791	7.1
2.31125	-21.7578	-20.0087	20.5859	-21.7578	20.5859	42.3436	0	0	0.659782	0.659782	0.659782	7.1
2.31167	-21.7794	-20.0196	20.5692	-21.7794	20.5692	42.3486	0	0	0.659741	0.659741	0.659741	7.1
2.31208	-21.7975	-20.0249	20.5574	-21.7975	20.5574	42.3548	0	0	0.659692	0.659692	0.659692	7.1
2.3125	-21.812	-20.0257	20.5475	-21.812	20.5475	42.3595	0	0	0.659638	0.659638	0.659638	7.1
2.31292	-21.8324	-20.0262	20.5365	-21.8324	20.5365	42.3689	0	0	0.659561	0.659561	0.659561	7.1
2.31333	-21.8593	-20.0283	20.526	-21.8593	20.526	42.3854	0	0	0.659467	0.659467	0.659467	7.1
2.31375	-21.8873	-20.0342	20.5194	-21.8873	20.5194	42.4067	0	0	0.659384	0.659384	0.659384	7.1
2.31417	-21.9128	-20.0446	20.5144	-21.9128	20.5144	42.4272	0	0	0.659328	0.659328	0.659328	7.08
2.31458	-21.9463	-20.0619	20.5066	-21.9463	20.5066	42.453	0	0	0.659268	0.659268	0.659268	7.08
2.315	-21.9884	-20.09	20.4937	-21.9884	20.4937	42.4822	0	0	0.659219	0.659219	0.659219	7.08
2.31542	-22.0231	-20.1245	20.4775	-22.0231	20.4775	42.5006	0	0	0.659221	0.659221	0.659221	7.08
2.31583	-22.0368	-20.1554	20.4591	-22.0368	20.4591	42.496	0	0	0.659288	0.659288	0.659288	7.08
2.31625	-22.0239	-20.1784	20.44	-22.0239	20.44	42.4639	0	0	0.659423	0.659423	0.659423	7.1
2.31667	-21.9907	-20.1977	20.4219	-21.9907	20.4219	42.4126	0	0	0.659621	0.659621	0.659621	7.1
2.31708	-21.9529	-20.2133	20.4056	-21.9529	20.4056	42.3585	0	0	0.659822	0.659822	0.659822	7.1
2.3175	-21.9285	-20.2194	20.39	-21.9285	20.39	42.3185	0	0	0.659936	0.659936	0.659936	7.12
2.31792	-21.9224	-20.219	20.3752	-21.9224	20.3752	42.2976	0	0	0.659955	0.659955	0.659955	7.12
2.31833	-21.9261	-20.2224	20.3629	-21.9261	20.3629	42.2889	0	0	0.659953	0.659953	0.659953	7.12
2.31875	-21.9368	-20.2331	20.3517	-21.9368	20.3517	42.2885	0	0	0.659952	0.659952	0.659952	7.12
2.31917	-21.955	-20.2457	20.3388	-21.955	20.3388	42.2938	0	0	0.659931	0.659931	0.659931	7.12
2.31958	-21.9721	-20.2578	20.3233	-21.9721	20.3233	42.2954	0	0	0.659912	0.659912	0.659912	7.12
2.32	-21.9796	-20.2738	20.3083	-21.9796	20.3083	42.288	0	0	0.659943	0.659943	0.659943	7.12
2.32042	-21.9853	-20.2925	20.2942	-21.9853	20.2942	42.2795	0	0	0.659993	0.659993	0.659993	7.12
2.32083	-22.0036	-20.305	20.2814	-22.0036	20.2814	42.2849	0	0	0.659972	0.659972	0.659972	7.12
2.32125	-22.0399	-20.3097	20.2716	-22.0399	20.2716	42.3114	0	0	0.659852	0.659852	0.659852	7.1
2.32167	-22.0893	-20.3183	20.2615	-22.0893	20.2615	42.3508	0	0	0.659697	0.659697	0.659697	7.1
2.32208	-22.1445	-20.3373	20.2477	-22.1445	20.2477	42.3923	0	0	0.659561	0.659561	0.659561	7.1
2.3225	-22.1998	-20.3576	20.2315	-22.1998	20.2315	42.4314	0	0	0.659431	0.659431	0.659431	7.1
2.32292	-22.2462	-20.368	20.2185	-22.2462	20.2185	42.4647	0	0	0.659295	0.659295	0.659295	7.08
2.32333	-22.273	-20.3703	20.2077	-22.273	20.2077	42.4807	0	0	0.659202	0.659202	0.659202	7.08
2.32375	-22.2741	-20.3693	20.1935	-22.2741	20.1935	42.4677	0	0	0.659191	0.659191	0.659191	7.08
2.32417	-22.2561	-20.3612	20.1757	-22.2561	20.1757	42.4318	0	0	0.659224	0.659224	0.659224	7.08
2.32458	-22.2334	-20.3482	20.1569	-22.2334	20.1569	42.3902	0	0	0.659255	0.659255	0.659255	7.08
2.325	-22.2176	-20.3402	20.1403	-22.2176	20.1403	42.358	0	0	0.65928	0.65928	0.65928	7.08
2.32542	-22.2099	-20.347	20.1296	-22.2099	20.1296	42.3394	0	0	0.659333	0.659333	0.659333	7.08
2.32583	-22.2137	-20.3678	20.1243	-22.2137	20.1243	42.338	0	0	0.6594	0.6594	0.6594	7.1
2.32625	-22.2339	-20.3969	20.1212	-22.2339	20.1212	42.3551	0	0	0.659438	0.659438	0.659438	7.1
2.32667	-22.2685	-20.4286	20.1192	-22.2685	20.1192	42.3876	0	0	0.659432	0.659432	0.659432	7.1
2.32708	-22.2993	-20.4546	20.1224	-22.2993	20.1224	42.4217	0	0	0.659419	0.659419	0.659419	7.1
2.3275	-22.3045	-20.474	20.1286	-22.3045	20.1286	42.433	0	0	0.659477	0.659477	0.659477	7.1
2.32792	-22.293	-20.4886	20.1252	-22.293	20.1252	42.4182	0	0	0.659577	0.659577	0.659577	7.1
2.32833	-22.2871	-20.5006	20.1093	-22.2871	20.1093	42.3963	0	0	0.659644	0.659644	0.659644	7.1
2.32875	-22.2944	-20.5086	20.091	-22.2944	20.091	42.3854	0	0	0.659644	0.659644	0.659644	7.1
2.32917	-22.3034	-20.5121	20.0778	-22.3034	20.0778	42.3812	0	0	0.659622	0.659622	0.659622	7.1
2.32958	-22.3132	-20.515	20.0637	-22.3132	20.0637	42.3768	0	0	0.659595	0.659595	0.659595	7.1
2.33	-22.3429	-20.5167	20.042	-22.3429	20.042	42.3848	0	0	0.659486	0.659486	0.659486	7.1
2.33042	-22.3898	-20.5171	20.0186	-22.3898	20.0186	42.4084	0	0	0.659307	0.659307	0.659307	7.08
2.33083	-22.4255	-20.5186	20.0021	-22.4255	20.0021	42.4276	0	0	0.659176	0.659176	0.659176	7.08
2.33125	-22.4351	-20.5286	19.9932	-22.4351	19.9932	42.4283	0	0	0.659178	0.659178	0.659178	7.08
2.33167	-22.4257	-20.549	19.9871	-22.4257	19.9871	42.4128	0	0	0.659292	0.659292	0.659292	7.08
2.33208	-22.4119	-20.5693	19.9823	-22.4119	19.9823	42.3942	0	0	0.659423	0.659423	0.659423	7.1
2.3325	-22.4001	-20.5834	19.9803	-22.4001	19.9803	42.3804	0	0	0.659522	0.659522	0.659522	7.1
2.33292	-22.398	-20.595	19.9808	-22.398	19.9808	42.3789	0	0	0.659576	0.659576	0.659576	7.1
2.33333	-22.4151	-20.6056	19.981	-22.4151	19.981	42.396	0	0	0.659553	0.659553	0.659553	7.1
2.33375	-22.443	-20.6075	19.9759	-22.443	19.9759	42.4189	0	0	0.659455	0.659455	0.659455	7.1
2.33417	-22.4792	-20.5968	19.965	-22.4792	19.965	42.4442	0	0	0.659275	0.659275	0.659275	7.08
2.33458	-22.5199	-20.5847	19.9505	-22.5199	19.9505	42.4703	0	0	0.659072	0.659072	0.659072	7.08
2.335	-22.5543	-20.5819	19.9368	-22.5543	19.9368	42.4911	0	0	0.65893	0.65893	0.65893	7.08
2.33542	-22.5642	-20.5855	19.9275	-22.5642	19.9275	42.4917	0	0	0.658906	0.658906	0.658906	7.08
2.33583	-22.5464	-20.59	19.92	-22.5464	19.92	42.4664	0	0	0.658989	0.658989	0.658989	7.08
2.33625	-22.5181	-20.5913	19.9127	-22.5181	19.9127	42.4308	0	0	0.659098	0.659098	0.659098	7.08
2.33667	-22.4865	-20.5904	19.903	-22.4865	19.903	42.3895	0	0	0.659211	0.659211	0.659211	7.08
2.33708	-22.4588	-20.5907	19.8929	-22.4588	19.8929	42.3517	0	0	0.659315	0.659315	0.659315	7.08
2.3375	-22.4384	-20.5957	19.8859	-22.4384	19.8859	42.3244	0	0	0.65941	0.65941	0.65941	7.1
2.33792	-22.4251	-20.6067	19.8828	-22.4251	19.8828	42.3079	0	0	0.659503	0.659503	0.659503	7.1
2.33833	-22.416	-20.6161	19.8849	-22.416	19.8849	42.3009	0	0	0.659575	0.659575	0.659575	7.1
2.33875	-22.4177	-20.623	19.8898	-22.4177	19.8898	42.3075	0	0	0.659597	0.659597	0.659597	7.1
2.33917	-22.44	-20.6337	19.8952	-22.44	19.8952	42.3352	0	0	0.659555	0.659555	0.659555	7.1
2.33958	-22.4722	-20.6476	19.899	-22.4722	19.899	42.3713	0	0	0.65949	0.65949	0.65949	7.1
2.34	-22.4973	-20.6573	19.8987	-22.4973	19.8987	42.396	0	0	0.659433	0.659433	0.659433	7.1
2.34042	-22.5145	-20.6582	19.8927	-22.5145	19.8927	42.4072	0	0	0.659371	0.659371	0.659371	7.1
2.34083	-22.5337	-20.6604	19.8796	-22.5337	19.8796	42.4133	0	0	0.659305	0.659305	0.659305	7.08
2.34125	-22.5548	-20.6725	19.8625	-22.5548	19.8625	42.4173	0	0	0.659271	0.659271	0.659271	7.08
2.34167	-22.5695	-20.6841	19.8467	-22.5695	19.8467	42.4162	0	0	0.659259	0.659259	0.659259	7.08
2.34208	-22.5687	-20.6803	19.8337	-22.5687	19.8337	42.4024	0	0	0.659244	0.659244	0.659244	7.08
2.3425	-22.5546	-20.6613	19.822	-22.5546	19.822	42.3766	0	0	0.65922	0.65922	0.65922	7.08
2.34292	-22.538	-20.6425	19.81	-22.538	19.81	42.348	0	0	0.659207	0.659207	0.659207	7.08
2.34333	-22.5266	-20.636	19.8013	-22.5266	19.8013	42.328	0	0	0.659222	0.659222	0.659222	7.08
2.34375	-22.524	-20.639	19.8006	-22.524	19.8006	42.3246	0	0	0.659244	0.659244	0.659244	7.08
2.34417	-22.5218	-20.6466	19.8062	-22.5218	19.8062	42.328	0	0	0.659283	0.659283	0.659283	7.08
2.34458	-22.5178	-20.659	19.8108	-22.5178	19.8108	42.3285	0	0	0.659348	0.659348	0.659348	7.08
2.345	-22.5177	-20.6747	19.8125	-22.5177	19.8125	42.3302	0	0	0.65941	0.65941	0.65941	7.1
2.34542	-22.5265	-20.6908	19.8137	-22.5265	19.8137	42.3402	0	0	0.65944	0.65944	0.65944	7.1
2.34583	-22.5407	-20.7039	19.8137	-22.5407	19.8137	42.3543	0	0	0.659439	0.659439	0.659439	7.1
2.34625	-22.5363	-20.7091	19.8094	-22.5363	19.8094	42.3457	0	0	0.659475	0.659475	0.659475	7.1
2.34667	-22.5043	-20.7031	19.8001	-22.5043	19.8001	42.3044	0	0	0.659571	0.659571	0.659571	7.1
2.34708	-22.4662	-20.6932	19.7933	-22.4662	19.7933	42.2595	0	0	0.659674	0.659674	0.659674	7.1
2.3475	-22.4528	-20.6915	19.7936	-22.4528	19.7936	42.2463	0	0	0.659718	0.659718	0.659718	7.1
2.34792	-22.4711	-20.6999	19.7988	-22.4711	19.7988	42.2698	0	0	0.659683	0.659683	0.659683	7.1
2.34833	-22.4981	-20.7091	19.8022	-22.4981	19.8022	42.3003	0	0	0.659618	0.659618	0.659618	7.1
2.34875	-22.5227	-20.7157	19.7993	-22.5227	19.7993	42.322	0	0	0.65955	0.65955	0.65955	7.1
2.34917	-22.5484	-20.7258	19.7947	-22.5484	19.7947	42.3431	0	0	0.659493	0.659493	0.659493	7.1
2.34958	-22.5721	-20.7422	19.7917	-22.5721	19.7917	42.3638	0	0	0.659467	0.659467	0.659467	7.1
2.35	-22.5782	-20.7603	19.7889	-22.5782	19.7889	42.3671	0	0	0.659515	0.659515	0.659515	7.1
2.35042	-22.5612	-20.769	19.7845	-22.5612	19.7845	42.3457	0	0	0.659613	0.659613	0.659613	7.1
2.35083	-22.5361	-20.7609	19.7796	-22.5361	19.7796	42.3157	0	0	0.659675	0.659675	0.659675	7.1
2.35125	-22.5169	-20.7409	19.7767	-22.5169	19.7767	42.2935	0	0	0.659668	0.659668	0.659668	7.1
2.35167	-22.5138	-20.7206	19.775	-22.5138	19.775	42.2889	0	0	0.659599	0.659599	0.659599	7.1
2.35208	-22.5352	-20.7062	19.7729	-22.5352	19.7729	42.3081	0	0	0.659462	0.659462	0.659462	7.1
2.3525	-22.5763	-20.6902	19.7699	-22.5763	19.7699	42.3463	0	0	0.659243	0.659243	0.659243	7.08
2.35292	-22.6146	-20.667	19.7683	-22.6146	19.7683	42.383	0	0	0.659008	0.659008	0.659008	7.08
2.35333	-22.633	-20.6441	19.7699	-22.633	19.7699	42.4029	0	0	0.658849	0.658849	0.658849	7.08
2.35375	-22.6385	-20.6337	19.7745	-22.6385	19.7745	42.413	0	0	0.658788	0.658788	0.658788	7.06
2.35417	-22.6439	-20.6385	19.7794	-22.6439	19.7794	42.4232	0	0	0.658788	0.658788	0.658788	7.06
2.35458	-22.6434	-20.6489	19.7829	-22.6434	19.7829	42.4263	0	0	0.658831	0.658831	0.658831	7.06
2.355	-22.6296	-20.6589	19.7854	-22.6296	19.7854	42.415	0	0	0.658923	0.658923	0.658923	7.08
2.35542	-22.6096	-20.6709	19.7861	-22.6096	19.7861	42.3957	0	0	0.659045	0.659045	0.659045	7.08
2.35583	-22.5956	-20.6875	19.7878	-22.5956	19.7878	42.3834	0	0	0.659163	0.659163	0.659163	7.08
2.35625	-22.5918	-20.703	19.7935	-22.5918	19.7935	42.3853	0	0	0.65924	0.65924	0.65924	7.08
2.35667	-22.5905	-20.7058	19.8025	-22.5905	19.8025	42.3929	0	0	0.659257	0.659257	0.659257	7.08
2.35708	-22.5816	-20.696	19.8095	-22.5816	19.8095	42.3911	0	0	0.659253	0.659253	0.659253	7.08
2.3575	-22.561	-20.687	19.8107	-22.561	19.8107	42.3717	0	0	0.659295	0.659295	0.659295	7.08
2.35792	-22.5391	-20.6904	19.8085	-22.5391	19.8085	42.3477	0	0	0.65939	0.65939	0.65939	7.1
2.35833	-22.5265	-20.7042	19.8055	-22.5265	19.8055	42.332	0	0	0.659492	0.659492	0.659492	7.1
2.35875	-22.5173	-20.7195	19.8013	-22.5173	19.8013	42.3186	0	0	0.659586	0.659586	0.659586	7.1
2.35917	-22.4952	-20.7323	19.7969	-22.4952	19.7969	42.2921	0	0	0.659719	0.659719	0.659719	7.1
2.35958	-22.4623	-20.744	19.7939	-22.4623	19.7939	42.2562	0	0	0.659889	0.659889	0.659889	7.12
2.36	-22.4385	-20.7526	19.7921	-22.4385	19.7921	42.2306	0	0	0.660013	0.660013	0.660013	7.12
2.36042	-22.4346	-20.7521	19.7892	-22.4346	19.7892	42.2238	0	0	0.660026	0.660026	0.660026	7.12
2.36083	-22.4451	-20.739	19.7842	-22.4451	19.7842	42.2293	0	0	0.659933	0.659933	0.659933	7.12
2.36125	-22.4538	-20.7167	19.7794	-22.4538	19.7794	42.2332	0	0	0.659811	0.659811	0.659811	7.1
2.36167	-22.4524	-20.6967	19.7762	-22.4524	19.7762	42.2286	0	0	0.659737	0.659737	0.659737	7.1
2.36208	-22.4446	-20.6821	19.7751	-22.4446	19.7751	42.2197	0	0	0.659709	0.659709	0.659709	7.1
2.3625	-22.4408	-20.6679	19.7786	-22.4408	19.7786	42.2194	0	0	0.659668	0.659668	0.659668	7.1
2.36292	-22.4388	-20.6543	19.7863	-22.4388	19.7863	42.2251	0	0	0.659623	0.659623	0.659623	7.1
2.36333	-22.4262	-20.6461	19.7948	-22.4262	19.7948	42.221	0	0	0.65964	0.65964	0.65964	7.1
2.36375	-22.4101	-20.6449	19.7993	-22.4101	19.7993	42.2093	0	0	0.659697	0.659697	0.659697	7.1
2.36417	-22.4121	-20.6494	19.7975	-22.4121	19.7975	42.2096	0	0	0.659706	0.659706	0.659706	7.1
2.36458	-22.4404	-20.6589	19.7902	-22.4404	19.7902	42.2306	0	0	0.659636	0.659636	0.659636	7.1
2.365	-22.4796	-20.6722	19.7797	-22.4796	19.7797	42.2592	0	0	0.659539	0.659539	0.659539	7.1
2.36542	-22.517	-20.6823	19.7709	-22.517	19.7709	42.2879	0	0	0.659436	0.659436	0.659436	7.1
2.36583	-22.5532	-20.6832	19.7673	-22.5532	19.7673	42.3206	0	0	0.659302	0.659302	0.659302	7.08
2.36625	-22.5843	-20.6767	19.7672	-22.5843	19.7672	42.3515	0	0	0.65916	0.65916	0.65916	7.08
2.36667	-22.6021	-20.6673	19.7681	-22.6021	19.7681	42.3702	0	0	0.659056	0.659056	0.659056	7.08
2.36708	-22.6027	-20.66	19.7704	-22.6027	19.7704	42.3731	0	0	0.659025	0.659025	0.659025	7.08
2.3675	-22.5882	-20.6562	19.7744	-22.5882	19.7744	42.3625	0	0	0.659066	0.659066	0.659066	7.08
2.36792	-22.5627	-20.6528	19.7771	-22.5627	19.7771	42.3398	0	0	0.659149	0.659149	0.659149	7.08
2.36833	-22.5337	-20.6495	19.7779	-22.5337	19.7779	42.3116	0	0	0.659245	0.659245	0.659245	7.08
2.36875	-22.5138	-20.6507	19.78	-22.5138	19.78	42.2938	0	0	0.659325	0.659325	0.659325	7.08
2.36917	-22.5098	-20.6524	19.7874	-22.5098	19.7874	42.2972	0	0	0.659348	0.659348	0.659348	7.08
2.36958	-22.5162	-20.6447	19.8003	-22.5162	19.8003	42.3165	0	0	0.659296	0.659296	0.659296	7.08
2.37	-22.5209	-20.624	19.8152	-22.5209	19.8152	42.3361	0	0	0.659199	0.659199	0.659199	7.08
2.37042	-22.5146	-20.6016	19.8294	-22.5146	19.8294	42.344	0	0	0.659137	0.659137	0.659137	7.08
2.37083	-22.5065	-20.5905	19.84	-22.5065	19.84	42.3465	0	0	0.659126	0.659126	0.659126	7.08
2.37125	-22.509	-20.5904	19.8451	-22.509	19.8451	42.3542	0	0	0.659117	0.659117	0.659117	7.08
2.37167	-22.5195	-20.5992	19.8444	-22.5195	19.8444	42.3638	0	0	0.659112	0.659112	0.659112	7.08
2.37208	-22.5237	-20.618	19.8407	-22.5237	19.8407	42.3644	0	0	0.659169	0.659169	0.659169	7.08
2.3725	-22.5174	-20.6488	19.8406	-22.5174	19.8406	42.358	0	0	0.659314	0.659314	0.659314	7.08
2.37292	-22.518	-20.6871	19.844	-22.518	19.844	42.362	0	0	0.659463	0.659463	0.659463	7.1
2.37333	-22.5331	-20.7205	19.8456	-22.5331	19.8456	42.3787	0	0	0.659538	0.659538	0.659538	7.1
2.37375	-22.5553	-20.74	19.8435	-22.5553	19.8435	42.3989	0	0	0.659531	0.659531	0.659531	7.1
2.37417	-22.5731	-20.7428	19.8427	-22.5731	19.8427	42.4158	0	0	0.659475	0.659475	0.659475	7.1
2.37458	-22.5864	-20.7314	19.8459	-22.5864	19.8459	42.4323	0	0	0.659381	0.659381	0.659381	7.1
2.375	-22.6043	-20.7124	19.8464	-22.6043	19.8464	42.4506	0	0	0.659239	0.659239	0.659239	7.08
2.37542	-22.6199	-20.6939	19.8412	-22.6199	19.8412	42.4611	0	0	0.659107	0.659107	0.659107	7.08
2.37583	-22.621	-20.6803	19.8371	-22.621	19.8371	42.458	0	0	0.659049	0.659049	0.659049	7.08
2.37625	-22.6059	-20.6705	19.8381	-22.6059	19.8381	42.4439	0	0	0.659067	0.659067	0.659067	7.08
2.37667	-22.5873	-20.6618	19.8414	-22.5873	19.8414	42.4287	0	0	0.659103	0.659103	0.659103	7.08
2.37708	-22.5723	-20.6574	19.8413	-22.5723	19.8413	42.4135	0	0	0.659142	0.659142	0.659142	7.08
2.3775	-22.5541	-20.6573	19.8388	-22.5541	19.8388	42.3929	0	0	0.65921	0.65921	0.65921	7.08
2.37792	-22.5332	-20.6581	19.8382	-22.5332	19.8382	42.3714	0	0	0.659291	0.659291	0.659291	7.08
2.37833	-22.5165	-20.6566	19.8397	-22.5165	19.8397	42.3562	0	0	0.659348	0.659348	0.659348	7.08
2.37875	-22.5015	-20.6542	19.8411	-22.5015	19.8411	42.3426	0	0	0.659395	0.659395	0.659395	7.1
2.37917	-22.4847	-20.6558	19.8401	-22.4847	19.8401	42.3248	0	0	0.659465	0.659465	0.659465	7.1
2.37958	-22.4749	-20.6613	19.838	-22.4749	19.838	42.3129	0	0	0.659523	0.659523	0.659523	7.1
2.38	-22.4842	-20.6685	19.8371	-22.4842	19.8371	42.3213	0	0	0.659516	0.659516	0.659516	7.1
2.38042	-22.5117	-20.6751	19.8388	-22.5117	19.8388	42.3505	0	0	0.659439	0.659439	0.659439	7.1
2.38083	-22.5494	-20.6827	19.841	-22.5494	19.841	42.3904	0	0	0.659327	0.659327	0.659327	7.08
2.38125	-22.5959	-20.6942	19.8412	-22.5959	19.8412	42.4371	0	0	0.659198	0.659198	0.659198	7.08
2.38167	-22.646	-20.7098	19.8387	-22.646	19.8387	42.4847	0	0	0.659071	0.659071	0.659071	7.08
2.38208	-22.6814	-20.7258	19.8338	-22.6814	19.8338	42.5153	0	0	0.659	0.659	0.659	7.08
2.3825	-22.6927	-20.7407	19.8265	-22.6927	19.8265	42.5192	0	0	0.659015	0.659015	0.659015	7.08
2.38292	-22.6869	-20.7525	19.814	-22.6869	19.814	42.5009	0	0	0.659081	0.659081	0.659081	7.08
2.38333	-22.6748	-20.7569	19.7963	-22.6748	19.7963	42.4711	0	0	0.659141	0.659141	0.659141	7.08
2.38375	-22.6625	-20.7575	19.7798	-22.6625	19.7798	42.4423	0	0	0.659186	0.659186	0.659186	7.08
2.38417	-22.656	-20.757	19.771	-22.656	19.771	42.427	0	0	0.659207	0.659207	0.659207	7.08
2.38458	-22.6688	-20.7547	19.7689	-22.6688	19.7689	42.4377	0	0	0.659149	0.659149	0.659149	7.08
2.385	-22.698	-20.7466	19.7668	-22.698	19.7668	42.4648	0	0	0.659008	0.659008	0.659008	7.08
2.38542	-22.7243	-20.7313	19.7618	-22.7243	19.7618	42.486	0	0	0.658849	0.658849	0.658849	7.08
2.38583	-22.7373	-20.7198	19.7558	-22.7373	19.7558	42.4932	0	0	0.658754	0.658754	0.658754	7.06
2.38625	-22.7448	-20.716	19.7499	-22.7448	19.7499	42.4947	0	0	0.658709	0.658709	0.658709	7.06
2.38667	-22.756	-20.7201	19.7449	-22.756	19.7449	42.5009	0	0	0.658683	0.658683	0.658683	7.06
2.38708	-22.7692	-20.7276	19.7432	-22.7692	19.7432	42.5123	0	0	0.658663	0.658663	0.658663	7.06
2.3875	-22.7806	-20.7332	19.7449	-22.7806	19.7449	42.5256	0	0	0.658642	0.658642	0.658642	7.06
2.38792	-22.7971	-20.7409	19.7495	-22.7971	19.7495	42.5466	0	0	0.658612	0.658612	0.658612	7.06
2.38833	-22.8253	-20.7494	19.756	-22.8253	19.756	42.5813	0	0	0.658542	0.658542	0.658542	7.06
2.38875	-22.8518	-20.7533	19.7633	-22.8518	19.7633	42.6151	0	0	0.658459	0.658459	0.658459	7.06
2.38917	-22.8578	-20.7457	19.7657	-22.8578	19.7657	42.6235	0	0	0.658408	0.658408	0.658408	7.06
2.38958	-22.8358	-20.7346	19.7611	-22.8358	19.7611	42.597	0	0	0.658445	0.658445	0.658445	7.06
2.39	-22.8017	-20.7353	19.7555	-22.8017	19.7555	42.5572	0	0	0.658574	0.658574	0.658574	7.06
2.39042	-22.7762	-20.7468	19.752	-22.7762	19.752	42.5282	0	0	0.658714	0.658714	0.658714	7.06
2.39083	-22.7633	-20.7585	19.7477	-22.7633	19.7477	42.5111	0	0	0.658807	0.658807	0.658807	7.06
2.39125	-22.7626	-20.767	19.7385	-22.7626	19.7385	42.5011	0	0	0.658841	0.658841	0.658841	7.08
2.39167	-22.7772	-20.78	19.73	-22.7772	19.73	42.5072	0	0	0.658836	0.658836	0.658836	7.08
2.39208	-22.8137	-20.7983	19.7273	-22.8137	19.7273	42.541	0	0	0.658771	0.658771	0.658771	7.06
2.3925	-22.8677	-20.8143	19.7282	-22.8677	19.7282	42.596	0	0	0.658632	0.658632	0.658632	7.06
2.39292	-22.9213	-20.827	19.732	-22.9213	19.732	42.6532	0	0	0.658483	0.658483	0.658483	7.06
2.39333	-22.958	-20.84	19.7419	-22.958	19.7419	42.6999	0	0	0.6584	0.6584	0.6584	7.06
2.39375	-22.9775	-20.8529	19.759	-22.9775	19.759	42.7365	0	0	0.658381	0.658381	0.658381	7.06
2.39417	-23.0004	-20.8602	19.7737	-23.0004	19.7737	42.7741	0	0	0.658327	0.658327	0.658327	7.06
2.39458	-23.0422	-20.862	19.7773	-23.0422	19.7773	42.8195	0	0	0.658181	0.658181	0.658181	7.04
2.395	-23.0908	-20.8625	19.7705	-23.0908	19.7705	42.8614	0	0	0.658002	0.658002	0.658002	7.04
2.39542	-23.1231	-20.8631	19.7577	-23.1231	19.7577	42.8809	0	0	0.657883	0.657883	0.657883	7.04
2.39583	-23.1363	-20.8642	19.7394	-23.1363	19.7394	42.8756	0	0	0.657835	0.657835	0.657835	7.04
2.39625	-23.144	-20.8684	19.7136	-23.144	19.7136	42.8576	0	0	0.657817	0.657817	0.657817	7.04
2.39667	-23.1443	-20.8769	19.6839	-23.1443	19.6839	42.8283	0	0	0.657843	0.657843	0.657843	7.04
2.39708	-23.1326	-20.8894	19.6571	-23.1326	19.6571	42.7897	0	0	0.657929	0.657929	0.657929	7.04
2.3975	-23.1225	-20.9042	19.6377	-23.1225	19.6377	42.7602	0	0	0.65802	0.65802	0.65802	7.04
2.39792	-23.1331	-20.9216	19.6253	-23.1331	19.6253	42.7584	0	0	0.658047	0.658047	0.658047	7.04
2.39833	-23.1658	-20.9424	19.6203	-23.1658	19.6203	42.7861	0	0	0.658006	0.658006	0.658006	7.04
2.39875	-23.2066	-20.966	19.622	-23.2066	19.622	42.8286	0	0	0.657948	0.657948	0.657948	7.04
2.39917	-23.2523	-20.993	19.6269	-23.2523	19.6269	42.8792	0	0	0.657885	0.657885	0.657885	7.04
2.39958	-23.2985	-21.0164	19.6322	-23.2985	19.6322	42.9307	0	0	0.657807	0.657807	0.657807	7.04
2.4	-23.3354	-21.0273	19.6365	-23.3354	19.6365	42.9719	0	0	0.657715	0.657715	0.657715	7.02
2.40042	-23.3605	-21.026	19.6406	-23.3605	19.6406	43.0011	0	0	0.657618	0.657618	0.657618	7.02
2.40083	-23.3809	-21.0249	19.6406	-23.3809	19.6406	43.0215	0	0	0.657539	0.657539	0.657539	7.02
2.40125	-23.4074	-21.0335	19.637	-23.4074	19.637	43.0444	0	0	0.657475	0.657475	0.657475	7.02
2.40167	-23.4336	-21.0483	19.6346	-23.4336	19.6346	43.0682	0	0	0.657436	0.657436	0.657436	7.02
2.40208	-23.4471	-21.0643	19.635	-23.4471	19.635	43.0821	0	0	0.657449	0.657449	0.657449	7.02
2.4025	-23.4545	-21.0839	19.6367	-23.4545	19.6367	43.0911	0	0	0.657498	0.657498	0.657498	7.02
2.40292	-23.4738	-21.1102	19.6372	-23.4738	19.6372	43.1111	0	0	0.657529	0.657529	0.657529	7.02
2.40333	-23.514	-21.137	19.6395	-23.514	19.6395	43.1535	0	0	0.657486	0.657486	0.657486	7.02
2.40375	-23.5652	-21.1561	19.6459	-23.5652	19.6459	43.2111	0	0	0.657375	0.657375	0.657375	7.02
2.40417	-23.6207	-21.1664	19.657	-23.6207	19.657	43.2777	0	0	0.657215	0.657215	0.657215	7
2.40458	-23.685	-21.176	19.6719	-23.685	19.6719	43.3569	0	0	0.657022	0.657022	0.657022	7
2.405	-23.7544	-21.1926	19.6876	-23.7544	19.6876	43.442	0	0	0.656838	0.656838	0.656838	7
2.40542	-23.813	-21.2171	19.7013	-23.813	19.7013	43.5143	0	0	0.656724	0.656724	0.656724	6.98
2.40583	-23.8552	-21.2458	19.7119	-23.8552	19.7119	43.5671	0	0	0.656685	0.656685	0.656685	6.98
2.40625	-23.8863	-21.2754	19.7215	-23.8863	19.7215	43.6078	0	0	0.656688	0.656688	0.656688	6.98
2.40667	-23.9085	-21.3074	19.7308	-23.9085	19.7308	43.6392	0	0	0.656733	0.656733	0.656733	6.98
2.40708	-23.927	-21.3442	19.7384	-23.927	19.7384	43.6654	0	0	0.656808	0.656808	0.656808	7
2.4075	-23.9589	-21.3841	19.7436	-23.9589	19.7436	43.7025	0	0	0.656847	0.656847	0.656847	7
2.40792	-24.0169	-21.4212	19.7502	-24.0169	19.7502	43.7671	0	0	0.656782	0.656782	0.656782	7
2.40833	-24.0936	-21.4497	19.7634	-24.0936	19.7634	43.857	0	0	0.656619	0.656619	0.656619	6.98
2.40875	-24.1719	-21.4697	19.7825	-24.1719	19.7825	43.9544	0	0	0.65642	0.65642	0.65642	6.98
2.40917	-24.2507	-21.4863	19.8025	-24.2507	19.8025	44.0532	0	0	0.656208	0.656208	0.656208	6.96
2.40958	-24.3391	-21.5063	19.8199	-24.3391	19.8199	44.159	0	0	0.655975	0.655975	0.655975	6.96
2.41	-24.4281	-21.528	19.8371	-24.4281	19.8371	44.2652	0	0	0.655747	0.655747	0.655747	6.94
2.41042	-24.5032	-21.5449	19.8556	-24.5032	19.8556	44.3588	0	0	0.655552	0.655552	0.655552	6.94
2.41083	-24.5614	-21.5552	19.8698	-24.5614	19.8698	44.4311	0	0	0.65539	0.65539	0.65539	6.94
2.41125	-24.6168	-21.5665	19.8753	-24.6168	19.8753	44.4921	0	0	0.65524	0.65524	0.65524	6.92
2.41167	-24.6876	-21.5823	19.8768	-24.6876	19.8768	44.5644	0	0	0.655053	0.655053	0.655053	6.92
2.41208	-24.7726	-21.5992	19.884	-24.7726	19.884	44.6566	0	0	0.654823	0.654823	0.654823	6.9
2.4125	-24.8601	-21.6197	19.8994	-24.8601	19.8994	44.7595	0	0	0.654601	0.654601	0.654601	6.9
2.41292	-24.946	-21.6496	19.9179	-24.946	19.9179	44.8639	0	0	0.654421	0.654421	0.654421	6.9
2.41333	-25.0369	-21.6904	19.9369	-25.0369	19.9369	44.9738	0	0	0.654265	0.654265	0.654265	6.88
2.41375	-25.1341	-21.7314	19.9574	-25.1341	19.9574	45.0915	0	0	0.65409	0.65409	0.65409	6.88
2.41417	-25.2234	-21.7638	19.9789	-25.2234	19.9789	45.2023	0	0	0.653911	0.653911	0.653911	6.88
2.41458	-25.2968	-21.7859	19.9991	-25.2968	19.9991	45.2959	0	0	0.653748	0.653748	0.653748	6.86
2.415	-25.3668	-21.7975	20.016	-25.3668	20.016	45.3828	0	0	0.653559	0.653559	0.653559	6.86
2.41542	-25.442	-21.805	20.0312	-25.442	20.0312	45.4732	0	0	0.653336	0.653336	0.653336	6.84
2.41583	-25.5258	-21.818	20.0482	-25.5258	20.0482	45.574	0	0	0.653107	0.653107	0.653107	6.84
2.41625	-25.6164	-21.8441	20.0694	-25.6164	20.0694	45.6857	0	0	0.652905	0.652905	0.652905	6.84
2.41667	-25.7133	-21.8802	20.0914	-25.7133	20.0914	45.8047	0	0	0.652719	0.652719	0.652719	6.82
2.41708	-25.8079	-21.9146	20.1102	-25.8079	20.1102	45.9181	0	0	0.652535	0.652535	0.652535	6.82
2.4175	-25.886	-21.9397	20.1266	-25.886	20.1266	46.0126	0	0	0.652373	0.652373	0.652373	6.8
2.41792	-25.9547	-21.9566	20.1426	-25.9547	20.1426	46.0973	0	0	0.652211	0.652211	0.652211	6.8
2.41833	-26.0209	-21.9669	20.1574	-26.0209	20.1574	46.1783	0	0	0.652035	0.652035	0.652035	6.8
2.41875	-26.089	-21.9709	20.1716	-26.089	20.1716	46.2606	0	0	0.65183	0.65183	0.65183	6.78
2.41917	-26.1552	-21.9705	20.1865	-26.1552	20.1865	46.3416	0	0	0.651617	0.651617	0.651617	6.78
2.41958	-26.2227	-21.971	20.2017	-26.2227	20.2017	46.4244	0	0	0.651403	0.651403	0.651403	6.76
2.42	-26.3143	-21.9793	20.2146	-26.3143	20.2146	46.5289	0	0	0.651139	0.651139	0.651139	6.74
2.42042	-26.4336	-21.9941	20.2253	-26.4336	20.2253	46.6589	0	0	0.650809	0.650809	0.650809	6.72
2.42083	-26.5658	-22.0106	20.2364	-26.5658	20.2364	46.8022	0	0	0.650445	0.650445	0.650445	6.7
2.42125	-26.6897	-22.0282	20.2479	-26.6897	20.2479	46.9377	0	0	0.650114	0.650114	0.650114	6.7
2.42167	-26.7985	-22.0461	20.2636	-26.7985	20.2636	47.062	0	0	0.649837	0.649837	0.649837	6.68
2.42208	-26.9033	-22.0688	20.2874	-26.9033	20.2874	47.1907	0	0	0.649592	0.649592	0.649592	6.66
2.4225	-27.006	-22.0975	20.3199	-27.006	20.3199	47.3259	0	0	0.64938	0.64938	0.64938	6.66
2.42292	-27.0982	-22.1257	20.358	-27.0982	20.358	47.4562	0	0	0.649203	0.649203	0.649203	6.64
2.42333	-27.172	-22.145	20.3978	-27.172	20.3978	47.5698	0	0	0.649054	0.649054	0.649054	6.64
2.42375	-27.2307	-22.1497	20.4358	-27.2307	20.4358	47.6664	0	0	0.648901	0.648901	0.648901	6.62
2.42417	-27.2955	-22.1481	20.4676	-27.2955	20.4676	47.7632	0	0	0.648705	0.648705	0.648705	6.62
2.42458	-27.3812	-22.1464	20.4919	-27.3812	20.4919	47.8731	0	0	0.648442	0.648442	0.648442	6.6
2.425	-27.4749	-22.1393	20.5107	-27.4749	20.5107	47.9856	0	0	0.648135	0.648135	0.648135	6.58
2.42542	-27.5583	-22.123	20.5261	-27.5583	20.5261	48.0844	0	0	0.647827	0.647827	0.647827	6.56
2.42583	-27.6361	-22.1021	20.5403	-27.6361	20.5403	48.1764	0	0	0.647522	0.647522	0.647522	6.54
2.42625	-27.732	-22.0886	20.5577	-27.732	20.5577	48.2897	0	0	0.647189	0.647189	0.647189	6.52
2.42667	-27.848	-22.0875	20.5805	-27.848	20.5805	48.4285	0	0	0.646842	0.646842	0.646842	6.5
2.42708	-27.9632	-22.093	20.6067	-27.9632	20.6067	48.5699	0	0	0.646523	0.646523	0.646523	6.48
2.4275	-28.0667	-22.101	20.6331	-28.0667	20.6331	48.6998	0	0	0.64625	0.64625	0.64625	6.46
2.42792	-28.1583	-22.1088	20.6587	-28.1583	20.6587	48.817	0	0	0.646013	0.646013	0.646013	6.44
2.42833	-28.2372	-22.1135	20.6833	-28.2372	20.6833	48.9206	0	0	0.645804	0.645804	0.645804	6.44
2.42875	-28.3013	-22.1104	20.7042	-28.3013	20.7042	49.0055	0	0	0.645612	0.645612	0.645612	6.42
2.42917	-28.3539	-22.0968	20.7181	-28.3539	20.7181	49.072	0	0	0.645415	0.645415	0.645415	6.4
2.42958	-28.3974	-22.0735	20.727	-28.3974	20.727	49.1244	0	0	0.645211	0.645211	0.645211	6.4
2.43	-28.4353	-22.0423	20.7365	-28.4353	20.7365	49.1718	0	0	0.644998	0.644998	0.644998	6.38
2.43042	-28.4853	-22.0122	20.7502	-28.4853	20.7502	49.2354	0	0	0.644755	0.644755	0.644755	6.36
2.43083	-28.5621	-21.9957	20.7683	-28.5621	20.7683	49.3304	0	0	0.644482	0.644482	0.644482	6.34
2.43125	-28.6594	-21.9962	20.79	-28.6594	20.79	49.4494	0	0	0.644209	0.644209	0.644209	6.32
2.43167	-28.7597	-22.0018	20.8161	-28.7597	20.8161	49.5757	0	0	0.643947	0.643947	0.643947	6.3
2.43208	-28.8516	-22.0032	20.8445	-28.8516	20.8445	49.696	0	0	0.643699	0.643699	0.643699	6.28
2.4325	-28.9301	-22.0051	20.8681	-28.9301	20.8681	49.7982	0	0	0.64349	0.64349	0.64349	6.26
2.43292	-28.993	-22.0121	20.8834	-28.993	20.8834	49.8764	0	0	0.643339	0.643339	0.643339	6.26
2.43333	-29.0454	-22.0175	20.8932	-29.0454	20.8932	49.9386	0	0	0.643211	0.643211	0.643211	6.24
2.43375	-29.0978	-22.0092	20.9016	-29.0978	20.9016	49.9994	0	0	0.643038	0.643038	0.643038	6.24
2.43417	-29.1472	-21.9901	20.9094	-29.1472	20.9094	50.0566	0	0	0.642837	0.642837	0.642837	6.22
2.43458	-29.1872	-21.9707	20.9158	-29.1872	20.9158	50.103	0	0	0.642661	0.642661	0.642661	6.2
2.435	-29.2283	-21.955	20.9231	-29.2283	20.9231	50.1515	0	0	0.642495	0.642495	0.642495	6.2
2.43542	-29.2817	-21.9385	20.9337	-29.2817	20.9337	50.2154	0	0	0.642294	0.642294	0.642294	6.18
2.43583	-29.3423	-21.9192	20.9482	-29.3423	20.9482	50.2905	0	0	0.642066	0.642066	0.642066	6.16
2.43625	-29.3911	-21.901	20.9653	-29.3911	20.9653	50.3564	0	0	0.641876	0.641876	0.641876	6.14
2.43667	-29.4225	-21.8856	20.9842	-29.4225	20.9842	50.4067	0	0	0.641747	0.641747	0.641747	6.12
2.43708	-29.4483	-21.8686	21.0069	-29.4483	21.0069	50.4552	0	0	0.641629	0.641629	0.641629	6.12
2.4375	-29.4773	-21.8434	21.0321	-29.4773	21.0321	50.5094	0	0	0.641477	0.641477	0.641477	6.1
2.43792	-29.51	-21.8075	21.0552	-29.51	21.0552	50.5652	0	0	0.641279	0.641279	0.641279	6.08
2.43833	-29.5431	-21.7591	21.0733	-29.5431	21.0733	50.6163	0	0	0.641036	0.641036	0.641036	6.06
2.43875	-29.5743	-21.6987	21.0894	-29.5743	21.0894	50.6638	0	0	0.640758	0.640758	0.640758	6.04
2.43917	-29.6097	-21.6297	21.1083	-29.6097	21.1083	50.718	0	0	0.640443	0.640443	0.640443	6
2.43958	-29.6575	-21.5629	21.1276	-29.6575	21.1276	50.7851	0	0	0.640102	0.640102	0.640102	5.98
2.44	-29.7112	-21.5084	21.144	-29.7112	21.144	50.8551	0	0	0.639784	0.639784	0.639784	5.94
2.44042	-29.7562	-21.4691	21.1594	-29.7562	21.1594	50.9156	0	0	0.63954	0.63954	0.63954	5.92
2.44083	-29.7873	-21.4476	21.1745	-29.7873	21.1745	50.9618	0	0	0.639392	0.639392	0.639392	5.9
2.44125	-29.818	-21.4413	21.1847	-29.818	21.1847	51.0027	0	0	0.639294	0.639294	0.639294	5.9
2.44167	-29.8595	-21.4365	21.1857	-29.8595	21.1857	51.0451	0	0	0.639165	0.639165	0.639165	5.88
2.44208	-29.8997	-21.4136	21.1815	-29.8997	21.1815	51.0813	0	0	0.638979	0.638979	0.638979	5.88
2.4425	-29.9261	-21.3688	21.1796	-29.9261	21.1796	51.1057	0	0	0.638759	0.638759	0.638759	5.86
2.44292	-29.9407	-21.312	21.1811	-29.9407	21.1811	51.1218	0	0	0.638535	0.638535	0.638535	5.84
2.44333	-29.9547	-21.2478	21.1882	-29.9547	21.1882	51.1429	0	0	0.638292	0.638292	0.638292	5.8
2.44375	-29.9763	-21.1788	21.2036	-29.9763	21.2036	51.18	0	0	0.638018	0.638018	0.638018	5.78
2.44417	-30.0017	-21.1184	21.2239	-30.0017	21.2239	51.2256	0	0	0.637764	0.637764	0.637764	5.76
2.44458	-30.0324	-21.0796	21.2421	-30.0324	21.2421	51.2745	0	0	0.637566	0.637566	0.637566	5.72
2.445	-30.0735	-21.0558	21.2572	-30.0735	21.2572	51.3306	0	0	0.637387	0.637387	0.637387	5.7
2.44542	-30.1272	-21.0332	21.2739	-30.1272	21.2739	51.4011	0	0	0.63718	0.63718	0.63718	5.68
2.44583	-30.1913	-21.0082	21.2903	-30.1913	21.2903	51.4816	0	0	0.636937	0.636937	0.636937	5.64
2.44625	-30.2487	-20.9846	21.3007	-30.2487	21.3007	51.5494	0	0	0.636714	0.636714	0.636714	5.62
2.44667	-30.2841	-20.9577	21.309	-30.2841	21.309	51.5931	0	0	0.636539	0.636539	0.636539	5.6
2.44708	-30.2908	-20.9215	21.3222	-30.2908	21.3222	51.613	0	0	0.636412	0.636412	0.636412	5.58
2.4475	-30.2795	-20.8801	21.3381	-30.2795	21.3381	51.6176	0	0	0.636317	0.636317	0.636317	5.58
2.44792	-30.2669	-20.839	21.3503	-30.2669	21.3503	51.6171	0	0	0.636225	0.636225	0.636225	5.56
2.44833	-30.2558	-20.7959	21.3582	-30.2558	21.3582	51.614	0	0	0.63612	0.63612	0.63612	5.54
2.44875	-30.2455	-20.744	21.3659	-30.2455	21.3659	51.6114	0	0	0.635984	0.635984	0.635984	5.52
2.44917	-30.2355	-20.6841	21.373	-30.2355	21.373	51.6085	0	0	0.635821	0.635821	0.635821	5.5
2.44958	-30.2307	-20.6244	21.3738	-30.2307	21.3738	51.6045	0	0	0.635641	0.635641	0.635641	5.48
2.45	-30.2343	-20.5694	21.3686	-30.2343	21.3686	51.6029	0	0	0.635451	0.635451	0.635451	5.46
2.45042	-30.2389	-20.5211	21.363	-30.2389	21.363	51.6019	0	0	0.635279	0.635279	0.635279	5.44
2.45083	-30.2413	-20.4839	21.3623	-30.2413	21.3623	51.6036	0	0	0.635153	0.635153	0.635153	5.42
2.45125	-30.2428	-20.461	21.3677	-30.2428	21.3677	51.6105	0	0	0.635078	0.635078	0.635078	5.4
2.45167	-30.25	-20.4504	21.3786	-30.25	21.3786	51.6287	0	0	0.635032	0.635032	0.635032	5.4
2.45208	-30.2723	-20.4436	21.3966	-30.2723	21.3966	51.6689	0	0	0.634962	0.634962	0.634962	5.4
2.4525	-30.3031	-20.4311	21.4217	-30.3031	21.4217	51.7248	0	0	0.634857	0.634857	0.634857	5.38
2.45292	-30.3326	-20.4056	21.4465	-30.3326	21.4465	51.7791	0	0	0.634714	0.634714	0.634714	5.34
2.45333	-30.3514	-20.3628	21.4629	-30.3514	21.4629	51.8143	0	0	0.634537	0.634537	0.634537	5.32
2.45375	-30.3629	-20.3032	21.4693	-30.3629	21.4693	51.8323	0	0	0.634319	0.634319	0.634319	5.28
2.45417	-30.3859	-20.2286	21.4701	-30.3859	21.4701	51.856	0	0	0.634021	0.634021	0.634021	5.22
2.45458	-30.418	-20.1417	21.4711	-30.418	21.4711	51.8891	0	0	0.633659	0.633659	0.633659	5.14
2.455	-30.4439	-20.0494	21.4722	-30.4439	21.4722	51.9161	0	0	0.633297	0.633297	0.633297	5.08
2.45542	-30.4549	-19.9628	21.4739	-30.4549	21.4739	51.9288	0	0	0.632992	0.632992	0.632992	5.02
2.45583	-30.4628	-19.8898	21.4772	-30.4628	21.4772	51.9401	0	0	0.63274	0.63274	0.63274	4.96
2.45625	-30.4816	-19.8289	21.4818	-30.4816	21.4818	51.9634	0	0	0.632499	0.632499	0.632499	4.9
2.45667	-30.4985	-19.7716	21.4863	-30.4985	21.4863	51.9848	0	0	0.632275	0.632275	0.632275	4.84
2.45708	-30.5007	-19.7132	21.4904	-30.5007	21.4904	51.9911	0	0	0.632086	0.632086	0.632086	4.78
2.4575	-30.4943	-19.6576	21.4986	-30.4943	21.4986	51.9929	0	0	0.631929	0.631929	0.631929	4.72
2.45792	-30.4879	-19.603	21.5103	-30.4879	21.5103	51.9982	0	0	0.631778	0.631778	0.631778	4.64
2.45833	-30.4774	-19.5423	21.5205	-30.4774	21.5205	51.9979	0	0	0.631617	0.631617	0.631617	4.58
2.45875	-30.4566	-19.4777	21.5258	-30.4566	21.5258	51.9823	0	0	0.631466	0.631466	0.631466	4.54
2.45917	-30.4301	-19.4196	21.5289	-30.4301	21.5289	51.959	0	0	0.631349	0.631349	0.631349	4.52
2.45958	-30.4079	-19.3726	21.5335	-30.4079	21.5335	51.9414	0	0	0.631257	0.631257	0.631257	4.5
2.46	-30.3897	-19.3244	21.5362	-30.3897	21.5362	51.9259	0	0	0.631151	0.631151	0.631151	4.48
2.46042	-30.3712	-19.2729	21.5351	-30.3712	21.5351	51.9063	0	0	0.631031	0.631031	0.631031	4.46
2.46083	-30.3475	-19.2327	21.5331	-30.3475	21.5331	51.8806	0	0	0.63096	0.63096	0.63096	4.44
2.46125	-30.3154	-19.2066	21.5352	-30.3154	21.5352	51.8506	0	0	0.630959	0.630959	0.630959	4.44
2.46167	-30.2818	-19.1814	21.5398	-30.2818	21.5398	51.8217	0	0	0.630966	0.630966	0.630966	4.44
2.46208	-30.2598	-19.1454	21.543	-30.2598	21.543	51.8028	0	0	0.630908	0.630908	0.630908	4.44
2.4625	-30.2592	-19.1055	21.5441	-30.2592	21.5441	51.8033	0	0	0.630782	0.630782	0.630782	4.4
2.46292	-30.2797	-19.0646	21.5458	-30.2797	21.5458	51.8255	0	0	0.6306	0.6306	0.6306	4.38
2.46333	-30.3173	-19.0123	21.5511	-30.3173	21.5511	51.8684	0	0	0.630341	0.630341	0.630341	4.34
2.46375	-30.3626	-18.9456	21.5592	-30.3626	21.5592	51.9219	0	0	0.630018	0.630018	0.630018	4.28
2.46417	-30.4009	-18.8784	21.5693	-30.4009	21.5693	51.9702	0	0	0.629715	0.629715	0.629715	4.24
2.46458	-30.4215	-18.826	21.5769	-30.4215	21.5769	51.9984	0	0	0.6295	0.6295	0.6295	4.2
2.465	-30.4289	-18.7861	21.5774	-30.4289	21.5774	52.0063	0	0	0.629355	0.629355	0.629355	4.18
2.46542	-30.434	-18.7496	21.5738	-30.434	21.5738	52.0077	0	0	0.629222	0.629222	0.629222	4.16
2.46583	-30.4333	-18.71	21.5722	-30.4333	21.5722	52.0056	0	0	0.629096	0.629096	0.629096	4.16
2.46625	-30.4148	-18.6667	21.5781	-30.4148	21.5781	51.9929	0	0	0.629007	0.629007	0.629007	4.14
2.46667	-30.383	-18.6223	21.5903	-30.383	21.5903	51.9734	0	0	0.628953	0.628953	0.628953	4.14
2.46708	-30.3605	-18.5783	21.6059	-30.3605	21.6059	51.9664	0	0	0.628879	0.628879	0.628879	4.14
2.4675	-30.3625	-18.5372	21.6227	-30.3625	21.6227	51.9852	0	0	0.628754	0.628754	0.628754	4.12
2.46792	-30.3778	-18.5005	21.6366	-30.3778	21.6366	52.0144	0	0	0.628609	0.628609	0.628609	4.1
2.46833	-30.3903	-18.4663	21.6458	-30.3903	21.6458	52.0361	0	0	0.628475	0.628475	0.628475	4.08
2.46875	-30.407	-18.4313	21.6514	-30.407	21.6514	52.0584	0	0	0.628326	0.628326	0.628326	4.06
2.46917	-30.4391	-18.389	21.6539	-30.4391	21.6539	52.093	0	0	0.628113	0.628113	0.628113	4.04
2.46958	-30.4738	-18.3396	21.6551	-30.4738	21.6551	52.1289	0	0	0.627871	0.627871	0.627871	4.02
2.47	-30.4846	-18.2868	21.658	-30.4846	21.658	52.1426	0	0	0.627678	0.627678	0.627678	4
2.47042	-30.4678	-18.2341	21.6648	-30.4678	21.6648	52.1326	0	0	0.627556	0.627556	0.627556	3.98
2.47083	-30.4463	-18.1823	21.673	-30.4463	21.673	52.1193	0	0	0.627449	0.627449	0.627449	3.98
2.47125	-30.4339	-18.1293	21.6786	-30.4339	21.6786	52.1125	0	0	0.627314	0.627314	0.627314	3.98
2.47167	-30.4201	-18.0793	21.6812	-30.4201	21.6812	52.1012	0	0	0.62719	0.62719	0.62719	3.96
2.47208	-30.3959	-18.0318	21.6823	-30.3959	21.6823	52.0782	0	0	0.627098	0.627098	0.627098	3.96
2.4725	-30.364	-17.9874	21.6822	-30.364	21.6822	52.0462	0	0	0.627033	0.627033	0.627033	3.96
2.47292	-30.3342	-17.9464	21.681	-30.3342	21.681	52.0152	0	0	0.626974	0.626974	0.626974	3.96
2.47333	-30.3141	-17.9108	21.6799	-30.3141	21.6799	51.994	0	0	0.626908	0.626908	0.626908	3.96
2.47375	-30.3036	-17.8831	21.6795	-30.3036	21.6795	51.9831	0	0	0.626844	0.626844	0.626844	3.96
2.47417	-30.3037	-17.8583	21.6812	-30.3037	21.6812	51.985	0	0	0.626766	0.626766	0.626766	3.94
2.47458	-30.3071	-17.8325	21.6863	-30.3071	21.6863	51.9934	0	0	0.626679	0.626679	0.626679	3.94
2.475	-30.3079	-17.7996	21.6937	-30.3079	21.6937	52.0016	0	0	0.626577	0.626577	0.626577	3.94
2.47542	-30.3056	-17.7561	21.6998	-30.3056	21.6998	52.0054	0	0	0.626448	0.626448	0.626448	3.94
2.47583	-30.3008	-17.7025	21.7025	-30.3008	21.7025	52.0034	0	0	0.62629	0.62629	0.62629	3.92
2.47625	-30.2964	-17.6452	21.7058	-30.2964	21.7058	52.0022	0	0	0.626119	0.626119	0.626119	3.92
2.47667	-30.2892	-17.5909	21.7123	-30.2892	21.7123	52.0016	0	0	0.625968	0.625968	0.625968	3.9
2.47708	-30.2799	-17.5425	21.7204	-30.2799	21.7204	52.0003	0	0	0.625842	0.625842	0.625842	3.9
2.4775	-30.2757	-17.5026	21.7286	-30.2757	21.7286	52.0043	0	0	0.625731	0.625731	0.625731	3.9
2.47792	-30.2767	-17.4696	21.738	-30.2767	21.738	52.0147	0	0	0.62563	0.62563	0.62563	3.88
2.47833	-30.2768	-17.4395	21.7501	-30.2768	21.7501	52.0269	0	0	0.625543	0.625543	0.625543	3.88
2.47875	-30.2696	-17.4071	21.7613	-30.2696	21.7613	52.0309	0	0	0.625465	0.625465	0.625465	3.88
2.47917	-30.2573	-17.3695	21.7678	-30.2573	21.7678	52.0251	0	0	0.625379	0.625379	0.625379	3.88
2.47958	-30.2538	-17.3272	21.7705	-30.2538	21.7705	52.0243	0	0	0.625255	0.625255	0.625255	3.86
2.48	-30.2639	-17.2806	21.7732	-30.2639	21.7732	52.0371	0	0	0.625083	0.625083	0.625083	3.86
2.48042	-30.2828	-17.2333	21.78	-30.2828	21.78	52.0627	0	0	0.624892	0.624892	0.624892	3.86
2.48083	-30.2959	-17.1909	21.7897	-30.2959	21.7897	52.0856	0	0	0.624732	0.624732	0.624732	3.84
2.48125	-30.3005	-17.1531	21.7981	-30.3005	21.7981	52.0985	0	0	0.624607	0.624607	0.624607	3.84
2.48167	-30.3084	-17.1188	21.8039	-30.3084	21.8039	52.1123	0	0	0.624483	0.624483	0.624483	3.84
2.48208	-30.3222	-17.0866	21.8108	-30.3222	21.8108	52.133	0	0	0.624353	0.624353	0.624353	3.82
2.4825	-30.3382	-17.0573	21.8206	-30.3382	21.8206	52.1588	0	0	0.624229	0.624229	0.624229	3.82
2.48292	-30.3537	-17.0307	21.8312	-30.3537	21.8312	52.1848	0	0	0.624116	0.624116	0.624116	3.82
2.48333	-30.3754	-17.0043	21.842	-30.3754	21.842	52.2173	0	0	0.623989	0.623989	0.623989	3.8
2.48375	-30.4016	-16.9791	21.8544	-30.4016	21.8544	52.256	0	0	0.623856	0.623856	0.623856	3.8
2.48417	-30.4198	-16.9563	21.8662	-30.4198	21.8662	52.286	0	0	0.62375	0.62375	0.62375	3.8
2.48458	-30.4266	-16.9339	21.8739	-30.4266	21.8739	52.3006	0	0	0.623669	0.623669	0.623669	3.78
2.485	-30.4223	-16.9064	21.8774	-30.4223	21.8774	52.2997	0	0	0.623595	0.623595	0.623595	3.78
2.48542	-30.4102	-16.8703	21.8772	-30.4102	21.8772	52.2874	0	0	0.623508	0.623508	0.623508	3.78
2.48583	-30.3947	-16.8281	21.8723	-30.3947	21.8723	52.267	0	0	0.623406	0.623406	0.623406	3.78
2.48625	-30.3839	-16.7822	21.8631	-30.3839	21.8631	52.247	0	0	0.623277	0.623277	0.623277	3.78
2.48667	-30.3864	-16.7292	21.8554	-30.3864	21.8554	52.2417	0	0	0.623096	0.623096	0.623096	3.78
2.48708	-30.3947	-16.6681	21.8528	-30.3947	21.8528	52.2475	0	0	0.62288	0.62288	0.62288	3.78
2.4875	-30.4029	-16.6024	21.8534	-30.4029	21.8534	52.2563	0	0	0.622651	0.622651	0.622651	3.76
2.48792	-30.4085	-16.5376	21.8533	-30.4085	21.8533	52.2618	0	0	0.622431	0.622431	0.622431	3.76
2.48833	-30.4146	-16.4772	21.8522	-30.4146	21.8522	52.2668	0	0	0.622223	0.622223	0.622223	3.76
2.48875	-30.4185	-16.4256	21.8526	-30.4185	21.8526	52.2712	0	0	0.62205	0.62205	0.62205	3.76
2.48917	-30.4064	-16.3895	21.8534	-30.4064	21.8534	52.2597	0	0	0.621964	0.621964	0.621964	3.76
2.48958	-30.3776	-16.3668	21.8503	-30.3776	21.8503	52.228	0	0	0.621956	0.621956	0.621956	3.76
2.49	-30.3424	-16.3473	21.8442	-30.3424	21.8442	52.1866	0	0	0.621971	0.621971	0.621971	3.76
2.49042	-30.3155	-16.325	21.8415	-30.3155	21.8415	52.1571	0	0	0.62196	0.62196	0.62196	3.76
2.49083	-30.3004	-16.3018	21.8464	-30.3004	21.8464	52.1468	0	0	0.621926	0.621926	0.621926	3.76
2.49125	-30.2877	-16.2761	21.8554	-30.2877	21.8554	52.1431	0	0	0.621881	0.621881	0.621881	3.76
2.49167	-30.2718	-16.2437	21.8629	-30.2718	21.8629	52.1347	0	0	0.621821	0.621821	0.621821	3.76
2.49208	-30.2473	-16.2072	21.8668	-30.2473	21.8668	52.1141	0	0	0.621765	0.621765	0.621765	3.76
2.4925	-30.2137	-16.1764	21.8673	-30.2137	21.8673	52.081	0	0	0.621745	0.621745	0.621745	3.76
2.49292	-30.1748	-16.156	21.8656	-30.1748	21.8656	52.0404	0	0	0.621769	0.621769	0.621769	3.76
2.49333	-30.1344	-16.1394	21.8639	-30.1344	21.8639	51.9983	0	0	0.62181	0.62181	0.62181	3.76
2.49375	-30.099	-16.121	21.8623	-30.099	21.8623	51.9613	0	0	0.621832	0.621832	0.621832	3.76
2.49417	-30.0769	-16.0923	21.8612	-30.0769	21.8612	51.9381	0	0	0.621791	0.621791	0.621791	3.76
2.49458	-30.0768	-16.0493	21.8613	-30.0768	21.8613	51.9381	0	0	0.621653	0.621653	0.621653	3.76
2.495	-30.0929	-15.9979	21.8645	-30.0929	21.8645	51.9574	0	0	0.621453	0.621453	0.621453	3.74
2.49542	-30.1017	-15.9453	21.871	-30.1017	21.871	51.9728	0	0	0.62127	0.62127	0.62127	3.74
2.49583	-30.0926	-15.8954	21.8773	-30.0926	21.8773	51.9699	0	0	0.621137	0.621137	0.621137	3.74
2.49625	-30.0829	-15.8435	21.8805	-30.0829	21.8805	51.9634	0	0	0.620995	0.620995	0.620995	3.74
2.49667	-30.0865	-15.7928	21.8805	-30.0865	21.8805	51.967	0	0	0.620824	0.620824	0.620824	3.74
2.49708	-30.0927	-15.7495	21.8815	-30.0927	21.8815	51.9742	0	0	0.620672	0.620672	0.620672	3.74
2.4975	-30.0877	-15.7128	21.8866	-30.0877	21.8866	51.9743	0	0	0.62057	0.62057	0.62057	3.72
2.49792	-30.0782	-15.6769	21.892	-30.0782	21.892	51.9702	0	0	0.620482	0.620482	0.620482	3.72
2.49833	-30.0729	-15.6337	21.8939	-30.0729	21.8939	51.9668	0	0	0.620358	0.620358	0.620358	3.72
2.49875	-30.069	-15.5852	21.895	-30.069	21.895	51.964	0	0	0.620212	0.620212	0.620212	3.72
2.49917	-30.069	-15.54	21.8978	-30.069	21.8978	51.9668	0	0	0.62007	0.62007	0.62007	3.72
2.49958	-30.0778	-15.5051	21.901	-30.0778	21.901	51.9788	0	0	0.61994	0.61994	0.61994	3.72
2.5	-30.0915	-15.4769	21.9017	-30.0915	21.9017	51.9932	0	0	0.619819	0.619819	0.619819	3.72
2.50042	-30.102	-15.4452	21.9019	-30.102	21.9019	52.0039	0	0	0.619693	0.619693	0.619693	3.72
2.50083	-30.1132	-15.4122	21.9047	-30.1132	21.9047	52.0179	0	0	0.619564	0.619564	0.619564	3.72
2.50125	-30.1207	-15.3879	21.9082	-30.1207	21.9082	52.0289	0	0	0.619472	0.619472	0.619472	3.7
2.50167	-30.1066	-15.3737	21.9109	-30.1066	21.9109	52.0175	0	0	0.619462	0.619462	0.619462	3.7
2.50208	-30.0702	-15.3594	21.9135	-30.0702	21.9135	51.9837	0	0	0.619502	0.619502	0.619502	3.7
2.5025	-30.0363	-15.3376	21.9165	-30.0363	21.9165	51.9528	0	0	0.619512	0.619512	0.619512	3.7
2.50292	-30.0302	-15.3152	21.9206	-30.0302	21.9206	51.9508	0	0	0.619459	0.619459	0.619459	3.7
2.50333	-30.0441	-15.298	21.9238	-30.0441	21.9238	51.9679	0	0	0.619374	0.619374	0.619374	3.7
2.50375	-30.065	-15.2775	21.9274	-30.065	21.9274	51.9924	0	0	0.619264	0.619264	0.619264	3.7
2.50417	-30.0897	-15.2464	21.9354	-30.0897	21.9354	52.0251	0	0	0.619115	0.619115	0.619115	3.7
2.50458	-30.1113	-15.209	21.9478	-30.1113	21.9478	52.0591	0	0	0.618957	0.618957	0.618957	3.7
2.505	-30.12	-15.172	21.9586	-30.12	21.9586	52.0787	0	0	0.618829	0.618829	0.618829	3.7
2.50542	-30.1083	-15.134	21.9626	-30.1083	21.9626	52.071	0	0	0.618738	0.618738	0.618738	3.7
2.50583	-30.0839	-15.0899	21.9648	-30.0839	21.9648	52.0487	0	0	0.618654	0.618654	0.618654	3.7
2.50625	-30.0493	-15.0424	21.9664	-30.0493	21.9664	52.0157	0	0	0.618582	0.618582	0.618582	3.7
2.50667	-30.0063	-14.997	21.9629	-30.0063	21.9629	51.9692	0	0	0.618531	0.618531	0.618531	3.7
2.50708	-29.9665	-14.9553	21.9544	-29.9665	21.9544	51.9209	0	0	0.618481	0.618481	0.618481	3.68
2.5075	-29.9438	-14.9157	21.949	-29.9438	21.949	51.8928	0	0	0.6184	0.6184	0.6184	3.68
2.50792	-29.9387	-14.8762	21.9503	-29.9387	21.9503	51.889	0	0	0.618286	0.618286	0.618286	3.68
2.50833	-29.9389	-14.8367	21.9511	-29.9389	21.9511	51.89	0	0	0.618159	0.618159	0.618159	3.68
2.50875	-29.9376	-14.7974	21.9503	-29.9376	21.9503	51.888	0	0	0.618035	0.618035	0.618035	3.68
2.50917	-29.9324	-14.7579	21.9537	-29.9324	21.9537	51.8861	0	0	0.617924	0.617924	0.617924	3.68
2.50958	-29.9252	-14.7207	21.9627	-29.9252	21.9627	51.888	0	0	0.617829	0.617829	0.617829	3.68
2.51	-29.9155	-14.6912	21.9726	-29.9155	21.9726	51.8882	0	0	0.617765	0.617765	0.617765	3.68
2.51042	-29.8974	-14.6642	21.9811	-29.8974	21.9811	51.8785	0	0	0.617728	0.617728	0.617728	3.68
2.51083	-29.869	-14.6339	21.9912	-29.869	21.9912	51.8602	0	0	0.617704	0.617704	0.617704	3.68
2.51125	-29.8365	-14.6026	22.0026	-29.8365	22.0026	51.8391	0	0	0.617689	0.617689	0.617689	3.68
2.51167	-29.8117	-14.5752	22.0093	-29.8117	22.0093	51.8211	0	0	0.617663	0.617663	0.617663	3.68
2.51208	-29.7989	-14.5469	22.0092	-29.7989	22.0092	51.8081	0	0	0.617601	0.617601	0.617601	3.68
2.5125	-29.7901	-14.5081	22.0055	-29.7901	22.0055	51.7956	0	0	0.617493	0.617493	0.617493	3.68
2.51292	-29.7833	-14.4673	22.004	-29.7833	22.004	51.7872	0	0	0.617375	0.617375	0.617375	3.66
2.51333	-29.7857	-14.4387	22.0067	-29.7857	22.0067	51.7924	0	0	0.61728	0.61728	0.61728	3.66
2.51375	-29.8012	-14.4206	22.0118	-29.8012	22.0118	51.8129	0	0	0.617192	0.617192	0.617192	3.66
2.51417	-29.8208	-14.3968	22.0179	-29.8208	22.0179	51.8387	0	0	0.617077	0.617077	0.617077	3.66
2.51458	-29.8278	-14.3582	22.0215	-29.8278	22.0215	51.8493	0	0	0.616941	0.616941	0.616941	3.66
2.515	-29.8168	-14.314	22.0224	-29.8168	22.0224	51.8392	0	0	0.616824	0.616824	0.616824	3.66
2.51542	-29.7999	-14.2744	22.0195	-29.7999	22.0195	51.8195	0	0	0.616732	0.616732	0.616732	3.66
2.51583	-29.7849	-14.238	22.0112	-29.7849	22.0112	51.7961	0	0	0.61664	0.61664	0.61664	3.66
2.51625	-29.7714	-14.2011	21.9981	-29.7714	21.9981	51.7696	0	0	0.61654	0.61654	0.61654	3.66
2.51667	-29.7583	-14.1663	21.9839	-29.7583	21.9839	51.7422	0	0	0.616443	0.616443	0.616443	3.64
2.51708	-29.7482	-14.1386	21.9752	-29.7482	21.9752	51.7234	0	0	0.616368	0.616368	0.616368	3.64
2.5175	-29.746	-14.1154	21.9719	-29.746	21.9719	51.7179	0	0	0.616295	0.616295	0.616295	3.64
2.51792	-29.748	-14.0889	21.9692	-29.748	21.9692	51.7173	0	0	0.616203	0.616203	0.616203	3.64
2.51833	-29.7507	-14.0566	21.9673	-29.7507	21.9673	51.718	0	0	0.616091	0.616091	0.616091	3.64
2.51875	-29.7527	-14.02	21.9699	-29.7527	21.9699	51.7226	0	0	0.615971	0.615971	0.615971	3.64
2.51917	-29.7558	-13.9831	21.9782	-29.7558	21.9782	51.734	0	0	0.615853	0.615853	0.615853	3.64
2.51958	-29.7595	-13.9479	21.9858	-29.7595	21.9858	51.7453	0	0	0.615739	0.615739	0.615739	3.64
2.52	-29.7622	-13.9134	21.9874	-29.7622	21.9874	51.7496	0	0	0.615623	0.615623	0.615623	3.64
2.52042	-29.7723	-13.8804	21.9857	-29.7723	21.9857	51.758	0	0	0.615493	0.615493	0.615493	3.64
2.52083	-29.7946	-13.8479	21.9865	-29.7946	21.9865	51.7811	0	0	0.615339	0.615339	0.615339	3.62
2.52125	-29.8215	-13.8173	21.9896	-29.8215	21.9896	51.811	0	0	0.615184	0.615184	0.615184	3.62
2.52167	-29.84	-13.7886	21.9894	-29.84	21.9894	51.8294	0	0	0.615051	0.615051	0.615051	3.62
2.52208	-29.8495	-13.763	21.9856	-29.8495	21.9856	51.8351	0	0	0.614943	0.614943	0.614943	3.62
2.5225	-29.8562	-13.7431	21.9844	-29.8562	21.9844	51.8405	0	0	0.614863	0.614863	0.614863	3.62
2.52292	-29.8499	-13.7258	21.9882	-29.8499	21.9882	51.838	0	0	0.614825	0.614825	0.614825	3.62
2.52333	-29.8189	-13.7086	21.9911	-29.8189	21.9911	51.81	0	0	0.614842	0.614842	0.614842	3.62
2.52375	-29.7765	-13.687	21.9886	-29.7765	21.9886	51.765	0	0	0.614864	0.614864	0.614864	3.62
2.52417	-29.751	-13.6627	21.987	-29.751	21.987	51.7379	0	0	0.614841	0.614841	0.614841	3.62
2.52458	-29.7557	-13.6394	21.9922	-29.7557	21.9922	51.7479	0	0	0.61476	0.61476	0.61476	3.62
2.525	-29.78	-13.6118	22	-29.78	22	51.78	0	0	0.614625	0.614625	0.614625	3.62
2.52542	-29.81	-13.5762	22.0021	-29.81	22.0021	51.8121	0	0	0.614446	0.614446	0.614446	3.62
2.52583	-29.8398	-13.531	21.9979	-29.8398	21.9979	51.8377	0	0	0.614231	0.614231	0.614231	3.6
2.52625	-29.8607	-13.4861	21.9911	-29.8607	21.9911	51.8519	0	0	0.614034	0.614034	0.614034	3.6
2.52667	-29.8563	-13.4487	21.9825	-29.8563	21.9825	51.8388	0	0	0.613915	0.613915	0.613915	3.6
2.52708	-29.8212	-13.418	21.9732	-29.8212	21.9732	51.7943	0	0	0.613884	0.613884	0.613884	3.6
2.5275	-29.7697	-13.3939	21.9645	-29.7697	21.9645	51.7341	0	0	0.61391	0.61391	0.61391	3.6
2.52792	-29.721	-13.3728	21.9589	-29.721	21.9589	51.6799	0	0	0.613944	0.613944	0.613944	3.6
2.52833	-29.6921	-13.3549	21.9568	-29.6921	21.9568	51.649	0	0	0.613948	0.613948	0.613948	3.6
2.52875	-29.6916	-13.337	21.9574	-29.6916	21.9574	51.649	0	0	0.613892	0.613892	0.613892	3.6
2.52917	-29.7205	-13.3179	21.96	-29.7205	21.96	51.6805	0	0	0.613769	0.613769	0.613769	3.6
2.52958	-29.7624	-13.2977	21.9613	-29.7624	21.9613	51.7237	0	0	0.613613	0.613613	0.613613	3.6
2.53	-29.7942	-13.2719	21.9607	-29.7942	21.9607	51.7549	0	0	0.61346	0.61346	0.61346	3.6
2.53042	-29.8082	-13.2433	21.9586	-29.8082	21.9586	51.7668	0	0	0.613335	0.613335	0.613335	3.58
2.53083	-29.8053	-13.2197	21.9527	-29.8053	21.9527	51.758	0	0	0.613259	0.613259	0.613259	3.58
2.53125	-29.7882	-13.2063	21.9421	-29.7882	21.9421	51.7302	0	0	0.613242	0.613242	0.613242	3.58
2.53167	-29.7626	-13.1971	21.9276	-29.7626	21.9276	51.6902	0	0	0.613254	0.613254	0.613254	3.58
2.53208	-29.744	-13.1833	21.9113	-29.744	21.9113	51.6553	0	0	0.613233	0.613233	0.613233	3.58
2.5325	-29.7438	-13.1671	21.8944	-29.7438	21.8944	51.6382	0	0	0.613164	0.613164	0.613164	3.58
2.53292	-29.7574	-13.1546	21.8777	-29.7574	21.8777	51.6351	0	0	0.613077	0.613077	0.613077	3.58
2.53333	-29.7783	-13.1452	21.8635	-29.7783	21.8635	51.6418	0	0	0.612986	0.612986	0.612986	3.58
2.53375	-29.8043	-13.1321	21.8521	-29.8043	21.8521	51.6563	0	0	0.612875	0.612875	0.612875	3.58
2.53417	-29.8288	-13.1098	21.8409	-29.8288	21.8409	51.6697	0	0	0.612738	0.612738	0.612738	3.58
2.53458	-29.8473	-13.0771	21.8306	-29.8473	21.8306	51.6779	0	0	0.612581	0.612581	0.612581	3.58
2.535	-29.8644	-13.0356	21.8213	-29.8644	21.8213	51.6856	0	0	0.6124	0.6124	0.6124	3.58
2.53542	-29.8849	-12.9924	21.8104	-29.8849	21.8104	51.6953	0	0	0.612205	0.612205	0.612205	3.58
2.53583	-29.8976	-12.9583	21.7958	-29.8976	21.7958	51.6934	0	0	0.612052	0.612052	0.612052	3.58
2.53625	-29.8888	-12.9403	21.7799	-29.8888	21.7799	51.6687	0	0	0.611996	0.611996	0.611996	3.58
2.53667	-29.8661	-12.9353	21.7673	-29.8661	21.7673	51.6334	0	0	0.612016	0.612016	0.612016	3.58
2.53708	-29.8415	-12.9359	21.757	-29.8415	21.757	51.5985	0	0	0.61206	0.61206	0.61206	3.58
2.5375	-29.8197	-12.9407	21.7463	-29.8197	21.7463	51.566	0	0	0.612112	0.612112	0.612112	3.58
2.53792	-29.8015	-12.9475	21.7376	-29.8015	21.7376	51.5392	0	0	0.612164	0.612164	0.612164	3.58
2.53833	-29.7939	-12.9481	21.7338	-29.7939	21.7338	51.5277	0	0	0.612179	0.612179	0.612179	3.58
2.53875	-29.807	-12.9337	21.7297	-29.807	21.7297	51.5367	0	0	0.612099	0.612099	0.612099	3.58
2.53917	-29.8356	-12.9108	21.7179	-29.8356	21.7179	51.5535	0	0	0.611951	0.611951	0.611951	3.58
2.53958	-29.8731	-12.8966	21.6965	-29.8731	21.6965	51.5696	0	0	0.611801	0.611801	0.611801	3.58
2.54	-29.9151	-12.8956	21.6696	-29.9151	21.6696	51.5847	0	0	0.611678	0.611678	0.611678	3.58
2.54042	-29.9536	-12.8949	21.6401	-29.9536	21.6401	51.5937	0	0	0.611561	0.611561	0.611561	3.58
2.54083	-29.9832	-12.8816	21.6081	-29.9832	21.6081	51.5913	0	0	0.61142	0.61142	0.61142	3.58
2.54125	-29.9984	-12.8627	21.5783	-29.9984	21.5783	51.5767	0	0	0.611294	0.611294	0.611294	3.58
2.54167	-30.0029	-12.8476	21.5556	-30.0029	21.5556	51.5585	0	0	0.611211	0.611211	0.611211	3.58
2.54208	-30.0012	-12.8322	21.5424	-30.0012	21.5424	51.5436	0	0	0.611151	0.611151	0.611151	3.58
2.5425	-29.9917	-12.8086	21.5367	-29.9917	21.5367	51.5284	0	0	0.611088	0.611088	0.611088	3.58
2.54292	-29.9774	-12.7828	21.5347	-29.9774	21.5347	51.5121	0	0	0.611034	0.611034	0.611034	3.58
2.54333	-29.9608	-12.7685	21.5344	-29.9608	21.5344	51.4953	0	0	0.611023	0.611023	0.611023	3.58
2.54375	-29.9537	-12.7603	21.5339	-29.9537	21.5339	51.4876	0	0	0.611011	0.611011	0.611011	3.58
2.54417	-29.9707	-12.7443	21.5306	-29.9707	21.5306	51.5014	0	0	0.610919	0.610919	0.610919	3.58
2.54458	-30.0132	-12.7212	21.5221	-30.0132	21.5221	51.5353	0	0	0.610744	0.610744	0.610744	3.58
2.545	-30.066	-12.7009	21.5074	-30.066	21.5074	51.5734	0	0	0.610549	0.610549	0.610549	3.58
2.54542	-30.1118	-12.6892	21.4861	-30.1118	21.4861	51.5979	0	0	0.61039	0.61039	0.61039	3.58
2.54583	-30.1513	-12.6815	21.4599	-30.1513	21.4599	51.6112	0	0	0.610252	0.610252	0.610252	3.58
2.54625	-30.1884	-12.6773	21.4305	-30.1884	21.4305	51.6189	0	0	0.610127	0.610127	0.610127	3.58
2.54667	-30.2113	-12.6807	21.4005	-30.2113	21.4005	51.6118	0	0	0.610056	0.610056	0.610056	3.58
2.54708	-30.2069	-12.6918	21.3695	-30.2069	21.3695	51.5765	0	0	0.610067	0.610067	0.610067	3.58
2.5475	-30.1844	-12.7056	21.3365	-30.1844	21.3365	51.5209	0	0	0.610124	0.610124	0.610124	3.58
2.54792	-30.1726	-12.7134	21.3042	-30.1726	21.3042	51.4768	0	0	0.610139	0.610139	0.610139	3.58
2.54833	-30.1866	-12.7109	21.2736	-30.1866	21.2736	51.4602	0	0	0.610067	0.610067	0.610067	3.58
2.54875	-30.2166	-12.7015	21.2449	-30.2166	21.2449	51.4615	0	0	0.609941	0.609941	0.609941	3.58
2.54917	-30.2495	-12.6896	21.2186	-30.2495	21.2186	51.4681	0	0	0.609803	0.609803	0.609803	3.58
2.54958	-30.288	-12.6724	21.1972	-30.288	21.1972	51.4853	0	0	0.609642	0.609642	0.609642	3.58
2.55	-30.3414	-12.6495	21.1789	-30.3414	21.1789	51.5203	0	0	0.609434	0.609434	0.609434	3.58
2.55042	-30.4028	-12.6265	21.1576	-30.4028	21.1576	51.5604	0	0	0.609206	0.609206	0.609206	3.58
2.55083	-30.4507	-12.6068	21.1312	-30.4507	21.1312	51.5819	0	0	0.609011	0.609011	0.609011	3.56
2.55125	-30.4749	-12.5874	21.1023	-30.4749	21.1023	51.5772	0	0	0.608865	0.608865	0.608865	3.56
2.55167	-30.4877	-12.5661	21.0729	-30.4877	21.0729	51.5606	0	0	0.608736	0.608736	0.608736	3.56
2.55208	-30.501	-12.5519	21.0428	-30.501	21.0428	51.5438	0	0	0.608628	0.608628	0.608628	3.56
2.5525	-30.5114	-12.5491	21.0144	-30.5114	21.0144	51.5258	0	0	0.608565	0.608565	0.608565	3.56
2.55292	-30.5107	-12.5532	20.9918	-30.5107	20.9918	51.5024	0	0	0.608555	0.608555	0.608555	3.56
2.55333	-30.5012	-12.5571	20.9774	-30.5012	20.9774	51.4786	0	0	0.608571	0.608571	0.608571	3.56
2.55375	-30.4936	-12.5555	20.9705	-30.4936	20.9705	51.4642	0	0	0.608574	0.608574	0.608574	3.56
2.55417	-30.4941	-12.5472	20.966	-30.4941	20.966	51.4602	0	0	0.608541	0.608541	0.608541	3.56
2.55458	-30.5044	-12.5319	20.9578	-30.5044	20.9578	51.4623	0	0	0.60846	0.60846	0.60846	3.56
2.555	-30.5212	-12.5154	20.9431	-30.5212	20.9431	51.4643	0	0	0.608355	0.608355	0.608355	3.56
2.55542	-30.5381	-12.502	20.9254	-30.5381	20.9254	51.4635	0	0	0.608256	0.608256	0.608256	3.56
2.55583	-30.5606	-12.4933	20.9062	-30.5606	20.9062	51.4669	0	0	0.608159	0.608159	0.608159	3.56
2.55625	-30.5982	-12.4912	20.8802	-30.5982	20.8802	51.4785	0	0	0.608043	0.608043	0.608043	3.56
2.55667	-30.6403	-12.4942	20.8463	-30.6403	20.8463	51.4866	0	0	0.607926	0.607926	0.607926	3.56
2.55708	-30.664	-12.4953	20.8119	-30.664	20.8119	51.4758	0	0	0.607841	0.607841	0.607841	3.56
2.5575	-30.6657	-12.4832	20.7853	-30.6657	20.7853	51.451	0	0	0.607767	0.607767	0.607767	3.56
2.55792	-30.6615	-12.4599	20.7653	-30.6615	20.7653	51.4269	0	0	0.607678	0.607678	0.607678	3.56
2.55833	-30.6619	-12.4375	20.7478	-30.6619	20.7478	51.4097	0	0	0.607584	0.607584	0.607584	3.56
2.55875	-30.6634	-12.4212	20.7329	-30.6634	20.7329	51.3963	0	0	0.607511	0.607511	0.607511	3.56
2.55917	-30.6636	-12.409	20.7215	-30.6636	20.7215	51.3851	0	0	0.607458	0.607458	0.607458	3.56
2.55958	-30.671	-12.4	20.7108	-30.671	20.7108	51.3818	0	0	0.607401	0.607401	0.607401	3.56
2.56	-30.6919	-12.3994	20.6958	-30.6919	20.6958	51.3877	0	0	0.607338	0.607338	0.607338	3.56
2.56042	-30.7271	-12.4063	20.6741	-30.7271	20.6741	51.4012	0	0	0.607262	0.607262	0.607262	3.56
2.56083	-30.7664	-12.41	20.6483	-30.7664	20.6483	51.4147	0	0	0.607162	0.607162	0.607162	3.56
2.56125	-30.7949	-12.4028	20.6234	-30.7949	20.6234	51.4183	0	0	0.607051	0.607051	0.607051	3.56
2.56167	-30.8153	-12.3879	20.5998	-30.8153	20.5998	51.4151	0	0	0.606933	0.606933	0.606933	3.56
2.56208	-30.8343	-12.3689	20.5754	-30.8343	20.5754	51.4097	0	0	0.606803	0.606803	0.606803	3.56
2.5625	-30.8511	-12.3439	20.5507	-30.8511	20.5507	51.4017	0	0	0.606658	0.606658	0.606658	3.56
2.56292	-30.8595	-12.3139	20.5291	-30.8595	20.5291	51.3886	0	0	0.606519	0.606519	0.606519	3.56
2.56333	-30.8601	-12.2855	20.5101	-30.8601	20.5101	51.3702	0	0	0.606403	0.606403	0.606403	3.56
2.56375	-30.8669	-12.2647	20.49	-30.8669	20.49	51.3569	0	0	0.606298	0.606298	0.606298	3.56
2.56417	-30.8812	-12.2462	20.4696	-30.8812	20.4696	51.3508	0	0	0.606184	0.606184	0.606184	3.56
2.56458	-30.8922	-12.2282	20.4526	-30.8922	20.4526	51.3448	0	0	0.606083	0.606083	0.606083	3.56
2.565	-30.9007	-12.2145	20.4398	-30.9007	20.4398	51.3405	0	0	0.606006	0.606006	0.606006	3.56
2.56542	-30.9149	-12.205	20.4267	-30.9149	20.4267	51.3416	0	0	0.60593	0.60593	0.60593	3.56
2.56583	-30.9346	-12.1989	20.4116	-30.9346	20.4116	51.3462	0	0	0.605852	0.605852	0.605852	3.56
2.56625	-30.9473	-12.1957	20.3938	-30.9473	20.3938	51.3411	0	0	0.605794	0.605794	0.605794	3.56
2.56667	-30.9561	-12.1955	20.3741	-30.9561	20.3741	51.3301	0	0	0.605752	0.605752	0.605752	3.56
2.56708	-30.9793	-12.1941	20.3538	-30.9793	20.3538	51.3332	0	0	0.605675	0.605675	0.605675	3.56
2.5675	-31.0134	-12.1891	20.3329	-31.0134	20.3329	51.3462	0	0	0.605564	0.605564	0.605564	3.56
2.56792	-31.0362	-12.1807	20.3118	-31.0362	20.3118	51.348	0	0	0.605465	0.605465	0.605465	3.56
2.56833	-31.0397	-12.1659	20.2912	-31.0397	20.2912	51.3309	0	0	0.605385	0.605385	0.605385	3.56
2.56875	-31.0335	-12.1463	20.2751	-31.0335	20.2751	51.3086	0	0	0.605315	0.605315	0.605315	3.56
2.56917	-31.0262	-12.1299	20.2623	-31.0262	20.2623	51.2885	0	0	0.605261	0.605261	0.605261	3.56
2.56958	-31.0221	-12.1197	20.2473	-31.0221	20.2473	51.2694	0	0	0.605219	0.605219	0.605219	3.56
2.57	-31.0224	-12.1049	20.2292	-31.0224	20.2292	51.2516	0	0	0.605148	0.605148	0.605148	3.56
2.57042	-31.0253	-12.0798	20.2097	-31.0253	20.2097	51.235	0	0	0.605037	0.605037	0.605037	3.56
2.57083	-31.0234	-12.0499	20.1897	-31.0234	20.1897	51.2131	0	0	0.60492	0.60492	0.60492	3.54
2.57125	-31.0186	-12.0177	20.1649	-31.0186	20.1649	51.1835	0	0	0.604795	0.604795	0.604795	3.54
2.57167	-31.0164	-11.9805	20.1354	-31.0164	20.1354	51.1518	0	0	0.604643	0.604643	0.604643	3.54
2.57208	-31.0099	-11.9389	20.1091	-31.0099	20.1091	51.119	0	0	0.604488	0.604488	0.604488	3.54
2.5725	-30.9964	-11.9006	20.0931	-30.9964	20.0931	51.0895	0	0	0.604371	0.604371	0.604371	3.54
2.57292	-30.987	-11.87	20.088	-30.987	20.088	51.075	0	0	0.604284	0.604284	0.604284	3.54
2.57333	-30.9972	-11.8482	20.0872	-30.9972	20.0872	51.0844	0	0	0.604192	0.604192	0.604192	3.54
2.57375	-31.0302	-11.8383	20.087	-31.0302	20.087	51.1172	0	0	0.604092	0.604092	0.604092	3.54
2.57417	-31.0786	-11.8377	20.0863	-31.0786	20.0863	51.1649	0	0	0.60399	0.60399	0.60399	3.54
2.57458	-31.1329	-11.8398	20.0806	-31.1329	20.0806	51.2135	0	0	0.60388	0.60388	0.60388	3.54
2.575	-31.1814	-11.8392	20.0661	-31.1814	20.0661	51.2475	0	0	0.603762	0.603762	0.603762	3.54
2.57542	-31.2184	-11.8335	20.0434	-31.2184	20.0434	51.2618	0	0	0.603641	0.603641	0.603641	3.54
2.57583	-31.2435	-11.8168	20.0186	-31.2435	20.0186	51.2621	0	0	0.603505	0.603505	0.603505	3.54
2.57625	-31.2565	-11.7835	19.9936	-31.2565	19.9936	51.25	0	0	0.60334	0.60334	0.60334	3.54
2.57667	-31.2537	-11.7424	19.9686	-31.2537	19.9686	51.2223	0	0	0.603181	0.603181	0.603181	3.54
2.57708	-31.2338	-11.7091	19.9457	-31.2338	19.9457	51.1795	0	0	0.603084	0.603084	0.603084	3.54
2.5775	-31.2085	-11.693	19.9276	-31.2085	19.9276	51.1361	0	0	0.60306	0.60306	0.60306	3.54
2.57792	-31.1928	-11.6917	19.9145	-31.1928	19.9145	51.1073	0	0	0.603071	0.603071	0.603071	3.54
2.57833	-31.1986	-11.6947	19.9032	-31.1986	19.9032	51.1018	0	0	0.603055	0.603055	0.603055	3.54
2.57875	-31.2199	-11.6928	19.8972	-31.2199	19.8972	51.1171	0	0	0.602999	0.602999	0.602999	3.54
2.57917	-31.2355	-11.679	19.8986	-31.2355	19.8986	51.1341	0	0	0.602924	0.602924	0.602924	3.54
2.57958	-31.2333	-11.6554	19.9008	-31.2333	19.9008	51.134	0	0	0.602854	0.602854	0.602854	3.54
2.58	-31.2185	-11.6282	19.8943	-31.2185	19.8943	51.1128	0	0	0.602787	0.602787	0.602787	3.54
2.58042	-31.2045	-11.5999	19.8798	-31.2045	19.8798	51.0843	0	0	0.602705	0.602705	0.602705	3.54
2.58083	-31.1868	-11.5713	19.8664	-31.1868	19.8664	51.0532	0	0	0.602631	0.602631	0.602631	3.54
2.58125	-31.1553	-11.5464	19.8544	-31.1553	19.8544	51.0097	0	0	0.602597	0.602597	0.602597	3.54
2.58167	-31.1216	-11.5272	19.8381	-31.1216	19.8381	50.9597	0	0	0.602582	0.602582	0.602582	3.54
2.58208	-31.1094	-11.5072	19.8223	-31.1094	19.8223	50.9318	0	0	0.602521	0.602521	0.602521	3.54
2.5825	-31.1318	-11.4761	19.8159	-31.1318	19.8159	50.9477	0	0	0.602366	0.602366	0.602366	3.54
2.58292	-31.1789	-11.4375	19.8167	-31.1789	19.8167	50.9956	0	0	0.602147	0.602147	0.602147	3.54
2.58333	-31.2357	-11.4054	19.8174	-31.2357	19.8174	51.053	0	0	0.601929	0.601929	0.601929	3.54
2.58375	-31.2975	-11.3858	19.8163	-31.2975	19.8163	51.1138	0	0	0.60174	0.60174	0.60174	3.54
2.58417	-31.3609	-11.3724	19.8173	-31.3609	19.8173	51.1782	0	0	0.601572	0.601572	0.601572	3.54
2.58458	-31.4166	-11.3548	19.82	-31.4166	19.82	51.2367	0	0	0.601408	0.601408	0.601408	3.54
2.585	-31.4531	-11.3319	19.8224	-31.4531	19.8224	51.2755	0	0	0.601264	0.601264	0.601264	3.54
2.58542	-31.4656	-11.3053	19.8254	-31.4656	19.8254	51.291	0	0	0.601157	0.601157	0.601157	3.54
2.58583	-31.464	-11.2742	19.8298	-31.464	19.8298	51.2938	0	0	0.601065	0.601065	0.601065	3.54
2.58625	-31.4587	-11.2408	19.8343	-31.4587	19.8343	51.293	0	0	0.600973	0.600973	0.600973	3.54
2.58667	-31.4569	-11.2137	19.8381	-31.4569	19.8381	51.295	0	0	0.600893	0.600893	0.600893	3.54
2.58708	-31.4617	-11.2006	19.8422	-31.4617	19.8422	51.3039	0	0	0.600846	0.600846	0.600846	3.54
2.5875	-31.466	-11.1988	19.8456	-31.466	19.8456	51.3115	0	0	0.600836	0.600836	0.600836	3.54
2.58792	-31.4636	-11.1997	19.8463	-31.4636	19.8463	51.3099	0	0	0.600845	0.600845	0.600845	3.54
2.58833	-31.4614	-11.1965	19.8439	-31.4614	19.8439	51.3053	0	0	0.600836	0.600836	0.600836	3.54
2.58875	-31.4759	-11.1869	19.8407	-31.4759	19.8407	51.3166	0	0	0.600772	0.600772	0.600772	3.54
2.58917	-31.5119	-11.1662	19.839	-31.5119	19.839	51.3508	0	0	0.600632	0.600632	0.600632	3.52
2.58958	-31.5554	-11.1322	19.8375	-31.5554	19.8375	51.3928	0	0	0.600434	0.600434	0.600434	3.52
2.59	-31.6001	-11.0863	19.8356	-31.6001	19.8356	51.4357	0	0	0.600196	0.600196	0.600196	3.52
2.59042	-31.6446	-11.0365	19.8345	-31.6446	19.8345	51.4791	0	0	0.599947	0.599947	0.599947	3.52
2.59083	-31.6745	-10.9926	19.8327	-31.6745	19.8327	51.5072	0	0	0.599744	0.599744	0.599744	3.52
2.59125	-31.6784	-10.9566	19.828	-31.6784	19.828	51.5063	0	0	0.599614	0.599614	0.599614	3.52
2.59167	-31.6577	-10.9262	19.8207	-31.6577	19.8207	51.4784	0	0	0.599546	0.599546	0.599546	3.52
2.59208	-31.6283	-10.8982	19.8121	-31.6283	19.8121	51.4404	0	0	0.599501	0.599501	0.599501	3.52
2.5925	-31.5982	-10.8746	19.8026	-31.5982	19.8026	51.4008	0	0	0.599471	0.599471	0.599471	3.52
2.59292	-31.572	-10.8518	19.7925	-31.572	19.7925	51.3645	0	0	0.599434	0.599434	0.599434	3.52
2.59333	-31.5593	-10.8237	19.7869	-31.5593	19.7869	51.3463	0	0	0.59936	0.59936	0.59936	3.52
2.59375	-31.5561	-10.7882	19.7883	-31.5561	19.7883	51.3444	0	0	0.599253	0.599253	0.599253	3.52
2.59417	-31.5544	-10.7462	19.7902	-31.5544	19.7902	51.3447	0	0	0.599122	0.599122	0.599122	3.52
2.59458	-31.5525	-10.7038	19.7888	-31.5525	19.7888	51.3413	0	0	0.598986	0.598986	0.598986	3.52
2.595	-31.5541	-10.6652	19.7844	-31.5541	19.7844	51.3385	0	0	0.598852	0.598852	0.598852	3.52
2.59542	-31.558	-10.6335	19.7797	-31.558	19.7797	51.3377	0	0	0.598736	0.598736	0.598736	3.52
2.59583	-31.5578	-10.6068	19.7743	-31.5578	19.7743	51.3322	0	0	0.598642	0.598642	0.598642	3.52
2.59625	-31.5514	-10.5829	19.7676	-31.5514	19.7676	51.319	0	0	0.598568	0.598568	0.598568	3.52
2.59667	-31.5396	-10.5631	19.7602	-31.5396	19.7602	51.2998	0	0	0.598516	0.598516	0.598516	3.52
2.59708	-31.5242	-10.5465	19.7519	-31.5242	19.7519	51.2761	0	0	0.598481	0.598481	0.598481	3.52
2.5975	-31.5151	-10.5314	19.7433	-31.5151	19.7433	51.2585	0	0	0.598438	0.598438	0.598438	3.52
2.59792	-31.5233	-10.5148	19.7365	-31.5233	19.7365	51.2598	0	0	0.59836	0.59836	0.59836	3.52
2.59833	-31.5347	-10.4927	19.7317	-31.5347	19.7317	51.2664	0	0	0.598259	0.598259	0.598259	3.52
2.59875	-31.5347	-10.4614	19.7251	-31.5347	19.7251	51.2598	0	0	0.598149	0.598149	0.598149	3.52
2.59917	-31.5366	-10.4228	19.7169	-31.5366	19.7169	51.2535	0	0	0.598009	0.598009	0.598009	3.52
2.59958	-31.5547	-10.3833	19.708	-31.5547	19.708	51.2627	0	0	0.597834	0.597834	0.597834	3.52
2.6	-31.5772	-10.3457	19.6976	-31.5772	19.6976	51.2748	0	0	0.597654	0.597654	0.597654	3.52
2.60042	-31.579	-10.3106	19.6856	-31.579	19.6856	51.2646	0	0	0.597521	0.597521	0.597521	3.52
2.60083	-31.5722	-10.279	19.6732	-31.5722	19.6732	51.2453	0	0	0.597414	0.597414	0.597414	3.52
2.60125	-31.5853	-10.252	19.6622	-31.5853	19.6622	51.2475	0	0	0.597287	0.597287	0.597287	3.52
2.60167	-31.6108	-10.2299	19.6503	-31.6108	19.6503	51.2611	0	0	0.59715	0.59715	0.59715	3.52
2.60208	-31.6249	-10.2071	19.6411	-31.6249	19.6411	51.266	0	0	0.597037	0.597037	0.597037	3.52
2.6025	-31.6204	-10.178	19.6409	-31.6204	19.6409	51.2612	0	0	0.596951	0.596951	0.596951	3.52
2.60292	-31.6161	-10.1432	19.6476	-31.6161	19.6476	51.2637	0	0	0.596855	0.596855	0.596855	3.52
2.60333	-31.6269	-10.1112	19.6543	-31.6269	19.6543	51.2813	0	0	0.596739	0.596739	0.596739	3.52
2.60375	-31.6457	-10.0894	19.6591	-31.6457	19.6591	51.3048	0	0	0.59664	0.59664	0.59664	3.52
2.60417	-31.6612	-10.0728	19.6662	-31.6612	19.6662	51.3274	0	0	0.596566	0.596566	0.596566	3.52
2.60458	-31.6702	-10.0558	19.6725	-31.6702	19.6725	51.3427	0	0	0.596503	0.596503	0.596503	3.5
2.605	-31.6804	-10.0381	19.6699	-31.6804	19.6699	51.3503	0	0	0.596423	0.596423	0.596423	3.5
2.60542	-31.6992	-10.0233	19.6572	-31.6992	19.6572	51.3564	0	0	0.596322	0.596322	0.596322	3.5
2.60583	-31.7175	-10.0076	19.6406	-31.7175	19.6406	51.3581	0	0	0.596214	0.596214	0.596214	3.5
2.60625	-31.7264	-9.98145	19.6267	-31.7264	19.6267	51.3531	0	0	0.596093	0.596093	0.596093	3.5
2.60667	-31.7236	-9.94459	19.6181	-31.7236	19.6181	51.3417	0	0	0.595967	0.595967	0.595967	3.5
2.60708	-31.7137	-9.90389	19.6145	-31.7137	19.6145	51.3281	0	0	0.595849	0.595849	0.595849	3.5
2.6075	-31.7037	-9.8661	19.6136	-31.7037	19.6136	51.3173	0	0	0.595743	0.595743	0.595743	3.5
2.60792	-31.6861	-9.82799	19.6138	-31.6861	19.6138	51.2998	0	0	0.595653	0.595653	0.595653	3.5
2.60833	-31.6586	-9.78817	19.6158	-31.6586	19.6158	51.2743	0	0	0.595577	0.595577	0.595577	3.5
2.60875	-31.626	-9.75116	19.6171	-31.626	19.6171	51.2432	0	0	0.595519	0.595519	0.595519	3.5
2.60917	-31.597	-9.71699	19.6119	-31.597	19.6119	51.209	0	0	0.595455	0.595455	0.595455	3.5
2.60958	-31.5761	-9.68335	19.5987	-31.5761	19.5987	51.1748	0	0	0.595366	0.595366	0.595366	3.5
2.61	-31.5594	-9.65157	19.5827	-31.5594	19.5827	51.1421	0	0	0.595271	0.595271	0.595271	3.5
2.61042	-31.5556	-9.62313	19.5704	-31.5556	19.5704	51.126	0	0	0.595168	0.595168	0.595168	3.5
2.61083	-31.569	-9.59525	19.563	-31.569	19.563	51.132	0	0	0.595042	0.595042	0.595042	3.5
2.61125	-31.5924	-9.56842	19.562	-31.5924	19.562	51.1544	0	0	0.59491	0.59491	0.59491	3.5
2.61167	-31.6189	-9.54999	19.5682	-31.6189	19.5682	51.1871	0	0	0.59481	0.59481	0.59481	3.5
2.61208	-31.6422	-9.54098	19.5784	-31.6422	19.5784	51.2206	0	0	0.594752	0.594752	0.594752	3.5
2.6125	-31.6596	-9.52613	19.5886	-31.6596	19.5886	51.2482	0	0	0.594685	0.594685	0.594685	3.5
2.61292	-31.6654	-9.49474	19.5959	-31.6654	19.5959	51.2613	0	0	0.594583	0.594583	0.594583	3.5
2.61333	-31.658	-9.45438	19.5999	-31.658	19.5999	51.2579	0	0	0.594471	0.594471	0.594471	3.5
2.61375	-31.6392	-9.41513	19.5963	-31.6392	19.5963	51.2355	0	0	0.594373	0.594373	0.594373	3.5
2.61417	-31.6163	-9.37799	19.5836	-31.6163	19.5836	51.1999	0	0	0.594276	0.594276	0.594276	3.5
2.61458	-31.6054	-9.33936	19.5661	-31.6054	19.5661	51.1715	0	0	0.594146	0.594146	0.594146	3.5
2.615	-31.6035	-9.30431	19.5487	-31.6035	19.5487	51.1523	0	0	0.59401	0.59401	0.59401	3.5
2.61542	-31.5884	-9.28187	19.5316	-31.5884	19.5316	51.12	0	0	0.593941	0.593941	0.593941	3.5
2.61583	-31.5595	-9.2712	19.5121	-31.5595	19.5121	51.0717	0	0	0.593931	0.593931	0.593931	3.5
2.61625	-31.5472	-9.26282	19.495	-31.5472	19.495	51.0422	0	0	0.593902	0.593902	0.593902	3.5
2.61667	-31.5633	-9.24849	19.4861	-31.5633	19.4861	51.0495	0	0	0.593813	0.593813	0.593813	3.5
2.61708	-31.575	-9.2271	19.4854	-31.575	19.4854	51.0604	0	0	0.593721	0.593721	0.593721	3.5
2.6175	-31.5616	-9.20244	19.4874	-31.5616	19.4874	51.049	0	0	0.593668	0.593668	0.593668	3.5
2.61792	-31.5466	-9.17528	19.4876	-31.5466	19.4876	51.0343	0	0	0.593607	0.593607	0.593607	3.5
2.61833	-31.5512	-9.14302	19.4855	-31.5512	19.4855	51.0367	0	0	0.59349	0.59349	0.59349	3.5
2.61875	-31.561	-9.10643	19.4811	-31.561	19.4811	51.0421	0	0	0.593346	0.593346	0.593346	3.5
2.61917	-31.5582	-9.0653	19.475	-31.5582	19.475	51.0332	0	0	0.593208	0.593208	0.593208	3.5
2.61958	-31.5567	-9.02018	19.4674	-31.5567	19.4674	51.024	0	0	0.593053	0.593053	0.593053	3.5
2.62	-31.5731	-8.97735	19.4578	-31.5731	19.4578	51.0308	0	0	0.592869	0.592869	0.592869	3.5
2.62042	-31.6006	-8.94484	19.4464	-31.6006	19.4464	51.047	0	0	0.592697	0.592697	0.592697	3.5
2.62083	-31.617	-8.92347	19.4356	-31.617	19.4356	51.0526	0	0	0.592581	0.592581	0.592581	3.5
2.62125	-31.6111	-8.90107	19.4283	-31.6111	19.4283	51.0394	0	0	0.592508	0.592508	0.592508	3.5
2.62167	-31.5914	-8.87267	19.425	-31.5914	19.425	51.0165	0	0	0.592446	0.592446	0.592446	3.5
2.62208	-31.5662	-8.84353	19.425	-31.5662	19.425	50.9912	0	0	0.592397	0.592397	0.592397	3.5
2.6225	-31.5459	-8.81129	19.4283	-31.5459	19.4283	50.9742	0	0	0.592333	0.592333	0.592333	3.48
2.62292	-31.5376	-8.77005	19.4329	-31.5376	19.4329	50.9705	0	0	0.59222	0.59222	0.59222	3.48
2.62333	-31.5393	-8.72044	19.4329	-31.5393	19.4329	50.9722	0	0	0.592055	0.592055	0.592055	3.48
2.62375	-31.5421	-8.67601	19.4226	-31.5421	19.4226	50.9646	0	0	0.591889	0.591889	0.591889	3.48
2.62417	-31.5423	-8.64091	19.4026	-31.5423	19.4026	50.9449	0	0	0.591745	0.591745	0.591745	3.48
2.62458	-31.5468	-8.60594	19.3791	-31.5468	19.3791	50.9259	0	0	0.591587	0.591587	0.591587	3.48
2.625	-31.55	-8.56891	19.3593	-31.55	19.3593	50.9093	0	0	0.591431	0.591431	0.591431	3.48
2.62542	-31.5383	-8.53278	19.3496	-31.5383	19.3496	50.8879	0	0	0.59132	0.59132	0.59132	3.48
2.62583	-31.5162	-8.49728	19.3511	-31.5162	19.3511	50.8673	0	0	0.591245	0.591245	0.591245	3.48
2.62625	-31.5024	-8.4553	19.3591	-31.5024	19.3591	50.8615	0	0	0.591144	0.591144	0.591144	3.48
2.62667	-31.4993	-8.41221	19.3678	-31.4993	19.3678	50.8671	0	0	0.591022	0.591022	0.591022	3.48
2.62708	-31.4982	-8.38196	19.3748	-31.4982	19.3748	50.873	0	0	0.590935	0.590935	0.590935	3.48
2.6275	-31.5046	-8.36166	19.3784	-31.5046	19.3784	50.883	0	0	0.590862	0.590862	0.590862	3.48
2.62792	-31.5222	-8.3378	19.3756	-31.5222	19.3756	50.8978	0	0	0.590749	0.590749	0.590749	3.48
2.62833	-31.5351	-8.30708	19.3696	-31.5351	19.3696	50.9047	0	0	0.590616	0.590616	0.590616	3.48
2.62875	-31.5298	-8.27855	19.3672	-31.5298	19.3672	50.897	0	0	0.590528	0.590528	0.590528	3.48
2.62917	-31.5201	-8.25104	19.3709	-31.5201	19.3709	50.891	0	0	0.590461	0.590461	0.590461	3.48
2.62958	-31.5209	-8.21114	19.3783	-31.5209	19.3783	50.8992	0	0	0.59034	0.59034	0.59034	3.48
2.63	-31.5187	-8.15421	19.3863	-31.5187	19.3863	50.905	0	0	0.59017	0.59017	0.59017	3.48
2.63042	-31.5005	-8.08918	19.3941	-31.5005	19.3941	50.8945	0	0	0.590001	0.590001	0.590001	3.48
2.63083	-31.4813	-8.02708	19.3983	-31.4813	19.3983	50.8796	0	0	0.589838	0.589838	0.589838	3.48
2.63125	-31.4839	-7.96976	19.3959	-31.4839	19.3959	50.8798	0	0	0.589641	0.589641	0.589641	3.48
2.63167	-31.5013	-7.9134	19.3885	-31.5013	19.3885	50.8898	0	0	0.589415	0.589415	0.589415	3.48
2.63208	-31.5092	-7.85643	19.3804	-31.5092	19.3804	50.8896	0	0	0.589202	0.589202	0.589202	3.48
2.6325	-31.5063	-7.80579	19.3744	-31.5063	19.3744	50.8807	0	0	0.589032	0.589032	0.589032	3.48
2.63292	-31.5052	-7.76749	19.3712	-31.5052	19.3712	50.8764	0	0	0.588904	0.588904	0.588904	3.48
2.63333	-31.5022	-7.73914	19.3702	-31.5022	19.3702	50.8723	0	0	0.588815	0.588815	0.588815	3.48
2.63375	-31.4843	-7.71212	19.3698	-31.4843	19.3698	50.8541	0	0	0.588757	0.588757	0.588757	3.48
2.63417	-31.4565	-7.67879	19.3669	-31.4565	19.3669	50.8234	0	0	0.588692	0.588692	0.588692	3.48
2.63458	-31.4295	-7.63987	19.3598	-31.4295	19.3598	50.7893	0	0	0.5886	0.5886	0.5886	3.48
2.635	-31.4022	-7.59687	19.3495	-31.4022	19.3495	50.7517	0	0	0.588491	0.588491	0.588491	3.48
2.63542	-31.3759	-7.55203	19.3364	-31.3759	19.3364	50.7123	0	0	0.588369	0.588369	0.588369	3.48
2.63583	-31.3606	-7.50178	19.323	-31.3606	19.323	50.6836	0	0	0.58821	0.58821	0.58821	3.48
2.63625	-31.3524	-7.44282	19.3132	-31.3524	19.3132	50.6656	0	0	0.588015	0.588015	0.588015	3.46
2.63667	-31.3318	-7.38072	19.3095	-31.3318	19.3095	50.6413	0	0	0.587841	0.587841	0.587841	3.46
2.63708	-31.2997	-7.3285	19.3096	-31.2997	19.3096	50.6094	0	0	0.587725	0.587725	0.587725	3.46
2.6375	-31.28	-7.29227	19.3079	-31.28	19.3079	50.5879	0	0	0.587637	0.587637	0.587637	3.46
2.63792	-31.2807	-7.25621	19.3041	-31.2807	19.3041	50.5847	0	0	0.587511	0.587511	0.587511	3.46
2.63833	-31.2889	-7.20192	19.3025	-31.2889	19.3025	50.5914	0	0	0.587315	0.587315	0.587315	3.46
2.63875	-31.2961	-7.13175	19.3058	-31.2961	19.3058	50.6019	0	0	0.587077	0.587077	0.587077	3.46
2.63917	-31.308	-7.06334	19.3124	-31.308	19.3124	50.6204	0	0	0.586842	0.586842	0.586842	3.46
2.63958	-31.3232	-6.99982	19.3176	-31.3232	19.3176	50.6408	0	0	0.586615	0.586615	0.586615	3.46
2.64	-31.3236	-6.92986	19.321	-31.3236	19.321	50.6446	0	0	0.586389	0.586389	0.586389	3.46
2.64042	-31.3037	-6.8512	19.3246	-31.3037	19.3246	50.6283	0	0	0.58617	0.58617	0.58617	3.46
2.64083	-31.2744	-6.77589	19.3284	-31.2744	19.3284	50.6028	0	0	0.585978	0.585978	0.585978	3.46
2.64125	-31.2499	-6.70696	19.3303	-31.2499	19.3303	50.5803	0	0	0.585795	0.585795	0.585795	3.46
2.64167	-31.231	-6.63713	19.3317	-31.231	19.3317	50.5627	0	0	0.585599	0.585599	0.585599	3.46
2.64208	-31.2106	-6.56785	19.3388	-31.2106	19.3388	50.5494	0	0	0.585417	0.585417	0.585417	3.46
2.6425	-31.1943	-6.50588	19.3527	-31.1943	19.3527	50.5469	0	0	0.585263	0.585263	0.585263	3.46
2.64292	-31.1809	-6.45243	19.3672	-31.1809	19.3672	50.5481	0	0	0.585132	0.585132	0.585132	3.46
2.64333	-31.1609	-6.40111	19.3754	-31.1609	19.3754	50.5364	0	0	0.58501	0.58501	0.58501	3.46
2.64375	-31.1302	-6.34775	19.3749	-31.1302	19.3749	50.5051	0	0	0.584885	0.584885	0.584885	3.46
2.64417	-31.1017	-6.28881	19.3671	-31.1017	19.3671	50.4688	0	0	0.584725	0.584725	0.584725	3.46
2.64458	-31.0952	-6.21785	19.3542	-31.0952	19.3542	50.4494	0	0	0.584481	0.584481	0.584481	3.46
2.645	-31.1057	-6.13688	19.3426	-31.1057	19.3426	50.4483	0	0	0.584177	0.584177	0.584177	3.46
2.64542	-31.118	-6.05518	19.3379	-31.118	19.3379	50.4559	0	0	0.583879	0.583879	0.583879	3.44
2.64583	-31.1276	-5.97601	19.3408	-31.1276	19.3408	50.4684	0	0	0.583606	0.583606	0.583606	3.44
2.64625	-31.1343	-5.89777	19.3472	-31.1343	19.3472	50.4814	0	0	0.583347	0.583347	0.583347	3.44
2.64667	-31.1238	-5.81597	19.3518	-31.1238	19.3518	50.4756	0	0	0.583102	0.583102	0.583102	3.44
2.64708	-31.0768	-5.72658	19.3534	-31.0768	19.3534	50.4302	0	0	0.582887	0.582887	0.582887	3.44
2.6475	-31.0041	-5.62511	19.3514	-31.0041	19.3514	50.3555	0	0	0.582667	0.582667	0.582667	3.44
2.64792	-30.94	-5.51163	19.3466	-30.94	19.3466	50.2867	0	0	0.582389	0.582389	0.582389	3.44
2.64833	-30.9039	-5.39441	19.3416	-30.9039	19.3416	50.2456	0	0	0.58205	0.58205	0.58205	3.44
2.64875	-30.8882	-5.27862	19.3383	-30.8882	19.3383	50.2265	0	0	0.581686	0.581686	0.581686	3.44
2.64917	-30.8862	-5.16576	19.3375	-30.8862	19.3375	50.2237	0	0	0.581314	0.581314	0.581314	3.44
2.64958	-30.9025	-5.05444	19.3383	-30.9025	19.3383	50.2408	0	0	0.58092	0.58092	0.58092	3.44
2.65	-30.9263	-4.94282	19.3395	-30.9263	19.3395	50.2658	0	0	0.580513	0.580513	0.580513	3.44
2.65042	-30.9385	-4.83242	19.3388	-30.9385	19.3388	50.2773	0	0	0.580126	0.580126	0.580126	3.44
2.65083	-30.9357	-4.72312	19.3333	-30.9357	19.3333	50.269	0	0	0.579759	0.579759	0.579759	3.42
2.65125	-30.9258	-4.61264	19.3236	-30.9258	19.3236	50.2494	0	0	0.579391	0.579391	0.579391	3.42
2.65167	-30.9148	-4.49736	19.3139	-30.9148	19.3139	50.2286	0	0	0.579009	0.579009	0.579009	3.42
2.65208	-30.9024	-4.37628	19.305	-30.9024	19.305	50.2074	0	0	0.578611	0.578611	0.578611	3.42
2.6525	-30.892	-4.25287	19.2929	-30.892	19.2929	50.1849	0	0	0.578197	0.578197	0.578197	3.42
2.65292	-30.8877	-4.12532	19.2745	-30.8877	19.2745	50.1622	0	0	0.577747	0.577747	0.577747	3.42
2.65333	-30.8762	-3.99008	19.2533	-30.8762	19.2533	50.1295	0	0	0.577278	0.577278	0.577278	3.42
2.65375	-30.8517	-3.84334	19.2344	-30.8517	19.2344	50.086	0	0	0.576794	0.576794	0.576794	3.42
2.65417	-30.8246	-3.68539	19.2179	-30.8246	19.2179	50.0424	0	0	0.576279	0.576279	0.576279	3.42
2.65458	-30.8068	-3.52307	19.1994	-30.8068	19.1994	50.0062	0	0	0.575732	0.575732	0.575732	3.42
2.655	-30.802	-3.35866	19.1762	-30.802	19.1762	49.9782	0	0	0.575149	0.575149	0.575149	3.4
2.65542	-30.7926	-3.18762	19.1487	-30.7926	19.1487	49.9414	0	0	0.574542	0.574542	0.574542	3.4
2.65583	-30.7718	-3.00211	19.118	-30.7718	19.118	49.8898	0	0	0.573897	0.573897	0.573897	3.4
2.65625	-30.7461	-2.80629	19.0834	-30.7461	19.0834	49.8295	0	0	0.573215	0.573215	0.573215	3.4
2.65667	-30.7216	-2.61204	19.0434	-30.7216	19.0434	49.7651	0	0	0.572526	0.572526	0.572526	3.4
2.65708	-30.6961	-2.42169	18.9988	-30.6961	18.9988	49.6949	0	0	0.57184	0.57184	0.57184	3.4
2.6575	-30.6641	-2.22725	18.9546	-30.6641	18.9546	49.6187	0	0	0.571149	0.571149	0.571149	3.38
2.65792	-30.6337	-2.01986	18.9164	-30.6337	18.9164	49.5501	0	0	0.570421	0.570421	0.570421	3.38
2.65833	-30.6123	-1.8025	18.8841	-30.6123	18.8841	49.4964	0	0	0.569657	0.569657	0.569657	3.38
2.65875	-30.5969	-1.58083	18.8539	-30.5969	18.8539	49.4508	0	0	0.568872	0.568872	0.568872	3.38
2.65917	-30.5819	-1.35246	18.8212	-30.5819	18.8212	49.4031	0	0	0.568058	0.568058	0.568058	3.38
2.65958	-30.571	-1.10976	18.784	-30.571	18.784	49.3551	0	0	0.567179	0.567179	0.567179	3.38
2.66	-30.563	-0.854649	18.7413	-30.563	18.7413	49.3044	0	0	0.566242	0.566242	0.566242	3.38
2.66042	-30.5476	-0.599056	18.6908	-30.5476	18.6908	49.2385	0	0	0.565294	0.565294	0.565294	3.38
2.66083	-30.5254	-0.352174	18.6329	-30.5254	18.6329	49.1584	0	0	0.564367	0.564367	0.564367	3.38
2.66125	-30.5125	-0.112176	18.5697	-30.5125	18.5697	49.0822	0	0	0.563437	0.563437	0.563437	3.38
2.66167	-30.5114	0.131406	18.5063	-30.5114	18.5063	49.0176	0	0	0.562477	0.562477	0.562477	3.36
2.66208	-30.4987	0.386968	18.4485	-30.4987	18.4485	48.9472	0	0	0.5615	0.5615	0.5615	3.36
2.6625	-30.4612	0.660859	18.3969	-30.4612	18.3969	48.8581	0	0	0.560502	0.560502	0.560502	3.36
2.66292	-30.4225	0.951089	18.3476	-30.4225	18.3476	48.7701	0	0	0.559451	0.559451	0.559451	3.36
2.66333	-30.4066	1.25141	18.2978	-30.4066	18.2978	48.7043	0	0	0.558333	0.558333	0.558333	3.36
2.66375	-30.4006	1.55877	18.2476	-30.4006	18.2476	48.6482	0	0	0.557175	0.557175	0.557175	3.36
2.66417	-30.3828	1.87185	18.1978	-30.3828	18.1978	48.5806	0	0	0.55601	0.55601	0.55601	3.36
2.66458	-30.3624	2.19015	18.1452	-30.3624	18.1452	48.5076	0	0	0.55482	0.55482	0.55482	3.36
2.665	-30.3651	2.50771	18.0859	-30.3651	18.0859	48.451	0	0	0.553587	0.553587	0.553587	3.34
2.66542	-30.3901	2.82285	18.0188	-30.3901	18.0188	48.4089	0	0	0.552318	0.552318	0.552318	3.34
2.66583	-30.4132	3.14237	17.9437	-30.4132	17.9437	48.3568	0	0	0.551014	0.551014	0.551014	3.34
2.66625	-30.421	3.47179	17.861	-30.421	17.861	48.282	0	0	0.549671	0.549671	0.549671	3.34
2.66667	-30.4164	3.8074	17.7735	-30.4164	17.7735	48.1898	0	0	0.548302	0.548302	0.548302	3.34
2.66708	-30.4037	4.13724	17.6866	-30.4037	17.6866	48.0903	0	0	0.546958	0.546958	0.546958	3.34
2.6675	-30.3837	4.45894	17.6067	-30.3837	17.6067	47.9904	0	0	0.545661	0.545661	0.545661	3.32
2.66792	-30.3619	4.77996	17.536	-30.3619	17.536	47.8979	0	0	0.544386	0.544386	0.544386	3.32
2.66833	-30.3449	5.10688	17.4732	-30.3449	17.4732	47.8181	0	0	0.543102	0.543102	0.543102	3.32
2.66875	-30.3351	5.43612	17.4142	-30.3351	17.4142	47.7493	0	0	0.541809	0.541809	0.541809	3.32
2.66917	-30.3335	5.7609	17.355	-30.3335	17.355	47.6885	0	0	0.54052	0.54052	0.54052	3.32
2.66958	-30.3392	6.08114	17.2932	-30.3392	17.2932	47.6323	0	0	0.539231	0.539231	0.539231	3.32
2.67	-30.3451	6.40016	17.2289	-30.3451	17.2289	47.574	0	0	0.537937	0.537937	0.537937	3.32
2.67042	-30.339	6.7166	17.1629	-30.339	17.1629	47.502	0	0	0.536652	0.536652	0.536652	3.3
2.67083	-30.3125	7.02237	17.0959	-30.3125	17.0959	47.4084	0	0	0.535414	0.535414	0.535414	3.3
2.67125	-30.2661	7.31572	17.0301	-30.2661	17.0301	47.2962	0	0	0.534232	0.534232	0.534232	3.3
2.67167	-30.2049	7.60181	16.9673	-30.2049	16.9673	47.1722	0	0	0.53309	0.53309	0.53309	3.3
2.67208	-30.1346	7.88564	16.9078	-30.1346	16.9078	47.0424	0	0	0.531965	0.531965	0.531965	3.3
2.6725	-30.0651	8.1652	16.8491	-30.0651	16.8491	46.9142	0	0	0.53085	0.53085	0.53085	3.3
2.67292	-30.0074	8.43398	16.7911	-30.0074	16.7911	46.7985	0	0	0.529763	0.529763	0.529763	3.3
2.67333	-29.97	8.6882	16.7365	-29.97	16.7365	46.7065	0	0	0.52872	0.52872	0.52872	3.28
2.67375	-29.9558	8.92387	16.686	-29.9558	16.686	46.6418	0	0	0.527737	0.527737	0.527737	3.28
2.67417	-29.9668	9.13294	16.6402	-29.9668	16.6402	46.6069	0	0	0.526846	0.526846	0.526846	3.28
2.67458	-29.9962	9.30918	16.6021	-29.9962	16.6021	46.5984	0	0	0.526084	0.526084	0.526084	3.28
2.675	-30.0301	9.44993	16.574	-30.0301	16.574	46.6041	0	0	0.525477	0.525477	0.525477	3.28
2.67542	-30.0592	9.54966	16.5552	-30.0592	16.5552	46.6144	0	0	0.525048	0.525048	0.525048	3.28
2.67583	-30.0869	9.59407	16.5421	-30.0869	16.5421	46.629	0	0	0.524834	0.524834	0.524834	3.28
2.67625	-30.1247	9.56888	16.5321	-30.1247	16.5321	46.6568	0	0	0.524874	0.524874	0.524874	3.28
2.67667	-30.1684	9.46771	16.5226	-30.1684	16.5226	46.691	0	0	0.525183	0.525183	0.525183	3.28
2.67708	-30.2112	9.27823	16.509	-30.2112	16.509	46.7202	0	0	0.525794	0.525794	0.525794	3.28
2.6775	-30.2595	8.97737	16.4929	-30.2595	16.4929	46.7524	0	0	0.526792	0.526792	0.526792	3.28
2.67792	-30.3301	8.54633	16.4779	-30.3301	16.4779	46.8081	0	0	0.528242	0.528242	0.528242	3.28
2.67833	-30.4369	7.98209	16.4656	-30.4369	16.4656	46.9025	0	0	0.530146	0.530146	0.530146	3.3
2.67875	-30.5814	7.28747	16.4564	-30.5814	16.4564	47.0378	0	0	0.532488	0.532488	0.532488	3.3
2.67917	-30.7646	6.46295	16.4531	-30.7646	16.4531	47.2177	0	0	0.535263	0.535263	0.535263	3.3
2.67958	-30.9861	5.51128	16.4581	-30.9861	16.4581	47.4442	0	0	0.538455	0.538455	0.538455	3.32
2.68	-31.2407	4.4431	16.4677	-31.2407	16.4677	47.7084	0	0	0.542007	0.542007	0.542007	3.32
2.68042	-31.5122	3.27814	16.4779	-31.5122	16.4779	47.9901	0	0	0.545842	0.545842	0.545842	3.32
2.68083	-31.7849	2.03743	16.4893	-31.7849	16.4893	48.2743	0	0	0.549895	0.549895	0.549895	3.34
2.68125	-32.0496	0.73754	16.5045	-32.0496	16.5045	48.5541	0	0	0.554122	0.554122	0.554122	3.34
2.68167	-32.3079	-0.607558	16.5253	-32.3079	16.5253	48.8333	0	0	0.558474	0.558474	0.558474	3.36
2.68208	-32.5721	-1.97722	16.5527	-32.5721	16.5527	49.1248	0	0	0.562867	0.562867	0.562867	3.36
2.6825	-32.8471	-3.34631	16.5884	-32.8471	16.5884	49.4355	0	0	0.567208	0.567208	0.567208	3.38
2.68292	-33.1279	-4.69954	16.6352	-33.1279	16.6352	49.7631	0	0	0.571454	0.571454	0.571454	3.4
2.68333	-33.402	-6.02545	16.6949	-33.402	16.6949	50.0969	0	0	0.575588	0.575588	0.575588	3.42
2.68375	-33.6558	-7.30579	16.7649	-33.6558	16.7649	50.4207	0	0	0.579566	0.579566	0.579566	3.42
2.68417	-33.8816	-8.52292	16.8391	-33.8816	16.8391	50.7207	0	0	0.583339	0.583339	0.583339	3.44
2.68458	-34.0815	-9.67454	16.916	-34.0815	16.916	50.9975	0	0	0.586901	0.586901	0.586901	3.46
2.685	-34.2628	-10.7695	16.9989	-34.2628	16.9989	51.2616	0	0	0.590283	0.590283	0.590283	3.48
2.68542	-34.4262	-11.8087	17.0869	-34.4262	17.0869	51.5131	0	0	0.593489	0.593489	0.593489	3.5
2.68583	-34.5618	-12.7872	17.1767	-34.5618	17.1767	51.7385	0	0	0.596524	0.596524	0.596524	3.5
2.68625	-34.6716	-13.7079	17.2678	-34.6716	17.2678	51.9394	0	0	0.599397	0.599397	0.599397	3.52
2.68667	-34.7681	-14.5769	17.3618	-34.7681	17.3618	52.1299	0	0	0.602113	0.602113	0.602113	3.54
2.68708	-34.8533	-15.3944	17.4562	-34.8533	17.4562	52.3095	0	0	0.604667	0.604667	0.604667	3.54
2.6875	-34.9152	-16.1536	17.5458	-34.9152	17.5458	52.4611	0	0	0.607062	0.607062	0.607062	3.56
2.68792	-34.9535	-16.8517	17.6315	-34.9535	17.6315	52.585	0	0	0.609294	0.609294	0.609294	3.58
2.68833	-34.9836	-17.4953	17.7188	-34.9836	17.7188	52.7024	0	0	0.611362	0.611362	0.611362	3.58
2.68875	-35.0109	-18.0916	17.8111	-35.0109	17.8111	52.822	0	0	0.613282	0.613282	0.613282	3.58
2.68917	-35.0284	-18.6454	17.9052	-35.0284	17.9052	52.9336	0	0	0.615083	0.615083	0.615083	3.62
2.68958	-35.0233	-19.1599	17.996	-35.0233	17.996	53.0193	0	0	0.6168	0.6168	0.6168	3.66
2.69	-34.9921	-19.6362	18.0828	-34.9921	18.0828	53.0749	0	0	0.618446	0.618446	0.618446	3.68
2.69042	-34.9429	-20.075	18.1677	-34.9429	18.1677	53.1106	0	0	0.62001	0.62001	0.62001	3.72
2.69083	-34.8924	-20.4755	18.2482	-34.8924	18.2482	53.1405	0	0	0.621451	0.621451	0.621451	3.74
2.69125	-34.8512	-20.8405	18.3198	-34.8512	18.3198	53.171	0	0	0.62275	0.62275	0.62275	3.78
2.69167	-34.8073	-21.1743	18.3854	-34.8073	18.3854	53.1926	0	0	0.623951	0.623951	0.623951	3.8
2.69208	-34.7478	-21.4806	18.4513	-34.7478	18.4513	53.1992	0	0	0.625102	0.625102	0.625102	3.86
2.6925	-34.6799	-21.763	18.5194	-34.6799	18.5194	53.1993	0	0	0.6262	0.6262	0.6262	3.92
2.69292	-34.6123	-22.0236	18.5859	-34.6123	18.5859	53.1982	0	0	0.627227	0.627227	0.627227	3.98
2.69333	-34.5399	-22.2646	18.6499	-34.5399	18.6499	53.1898	0	0	0.628203	0.628203	0.628203	4.06
2.69375	-34.4493	-22.4814	18.715	-34.4493	18.715	53.1643	0	0	0.629148	0.629148	0.629148	4.16
2.69417	-34.3456	-22.6707	18.7827	-34.3456	18.7827	53.1283	0	0	0.630042	0.630042	0.630042	4.28
2.69458	-34.248	-22.8345	18.8514	-34.248	18.8514	53.0994	0	0	0.630842	0.630842	0.630842	4.42
2.695	-34.1575	-22.9764	18.9187	-34.1575	18.9187	53.0762	0	0	0.631556	0.631556	0.631556	4.56
2.69542	-34.0591	-23.099	18.9849	-34.0591	18.9849	53.0441	0	0	0.632229	0.632229	0.632229	4.82
2.69583	-33.9384	-23.2015	19.0509	-33.9384	19.0509	52.9893	0	0	0.632896	0.632896	0.632896	5
2.69625	-33.8024	-23.2891	19.1185	-33.8024	19.1185	52.9209	0	0	0.633556	0.633556	0.633556	5.12
2.69667	-33.6682	-23.3684	19.1875	-33.6682	19.1875	52.8557	0	0	0.634189	0.634189	0.634189	5.26
2.69708	-33.5441	-23.4417	19.2583	-33.5441	19.2583	52.8023	0	0	0.634779	0.634779	0.634779	5.36
2.6975	-33.436	-23.5099	19.3298	-33.436	19.3298	52.7658	0	0	0.635314	0.635314	0.635314	5.44
2.69792	-33.3392	-23.5689	19.3992	-33.3392	19.3992	52.7385	0	0	0.63579	0.63579	0.63579	5.5
2.69833	-33.2394	-23.6154	19.4646	-33.2394	19.4646	52.7041	0	0	0.636233	0.636233	0.636233	5.56
2.69875	-33.1214	-23.647	19.5241	-33.1214	19.5241	52.6455	0	0	0.636672	0.636672	0.636672	5.62
2.69917	-32.9854	-23.6657	19.58	-32.9854	19.58	52.5655	0	0	0.637117	0.637117	0.637117	5.68
2.69958	-32.8501	-23.6793	19.6332	-32.8501	19.6332	52.4834	0	0	0.637544	0.637544	0.637544	5.72
2.7	-32.7227	-23.6863	19.6843	-32.7227	19.6843	52.4071	0	0	0.637929	0.637929	0.637929	5.78
2.70042	-32.5988	-23.6809	19.7351	-32.5988	19.7351	52.3339	0	0	0.638266	0.638266	0.638266	5.8
2.70083	-32.4732	-23.6625	19.7874	-32.4732	19.7874	52.2606	0	0	0.638568	0.638568	0.638568	5.84
2.70125	-32.3455	-23.6453	19.8431	-32.3455	19.8431	52.1886	0	0	0.638882	0.638882	0.638882	5.86
2.70167	-32.212	-23.6413	19.8989	-32.212	19.8989	52.1109	0	0	0.639255	0.639255	0.639255	5.9
2.70208	-32.0609	-23.6413	19.9535	-32.0609	19.9535	52.0144	0	0	0.639688	0.639688	0.639688	5.94
2.7025	-31.8945	-23.6301	20.0083	-31.8945	20.0083	51.9028	0	0	0.640129	0.640129	0.640129	5.98
2.70292	-31.7282	-23.6076	20.0651	-31.7282	20.0651	51.7933	0	0	0.640535	0.640535	0.640535	6.02
2.70333	-31.5785	-23.5864	20.1209	-31.5785	20.1209	51.6994	0	0	0.640902	0.640902	0.640902	6.04
2.70375	-31.4581	-23.5704	20.1701	-31.4581	20.1701	51.6282	0	0	0.641204	0.641204	0.641204	6.08
2.70417	-31.3672	-23.5494	20.2138	-31.3672	20.2138	51.5809	0	0	0.641406	0.641406	0.641406	6.1
2.70458	-31.2898	-23.5155	20.2549	-31.2898	20.2549	51.5447	0	0	0.641529	0.641529	0.641529	6.1
2.705	-31.2005	-23.4747	20.2959	-31.2005	20.2959	51.4965	0	0	0.641662	0.641662	0.641662	6.12
2.70542	-31.0928	-23.4387	20.3346	-31.0928	20.3346	51.4274	0	0	0.641861	0.641861	0.641861	6.14
2.70583	-30.9848	-23.4114	20.37	-30.9848	20.37	51.3548	0	0	0.642088	0.642088	0.642088	6.16
2.70625	-30.8839	-23.3849	20.4038	-30.8839	20.4038	51.2877	0	0	0.642297	0.642297	0.642297	6.18
2.70667	-30.7774	-23.3483	20.4349	-30.7774	20.4349	51.2122	0	0	0.642489	0.642489	0.642489	6.2
2.70708	-30.6549	-23.2988	20.4622	-30.6549	20.4622	51.1172	0	0	0.642682	0.642682	0.642682	6.2
2.7075	-30.5239	-23.2424	20.4848	-30.5239	20.4848	51.0087	0	0	0.642875	0.642875	0.642875	6.22
2.70792	-30.3932	-23.1898	20.5047	-30.3932	20.5047	50.8979	0	0	0.643079	0.643079	0.643079	6.24
2.70833	-30.2608	-23.142	20.5267	-30.2608	20.5267	50.7875	0	0	0.643305	0.643305	0.643305	6.26
2.70875	-30.1277	-23.0924	20.5536	-30.1277	20.5536	50.6813	0	0	0.643531	0.643531	0.643531	6.26
2.70917	-29.9994	-23.0441	20.5872	-29.9994	20.5872	50.5866	0	0	0.643751	0.643751	0.643751	6.28
2.70958	-29.8798	-23.0134	20.6266	-29.8798	20.6266	50.5063	0	0	0.644008	0.644008	0.644008	6.3
2.71	-29.7703	-23.0073	20.6674	-29.7703	20.6674	50.4377	0	0	0.644319	0.644319	0.644319	6.32
2.71042	-29.6731	-23.0061	20.7055	-29.6731	20.7055	50.3786	0	0	0.64461	0.64461	0.64461	6.34
2.71083	-29.588	-22.9888	20.7406	-29.588	20.7406	50.3286	0	0	0.644813	0.644813	0.644813	6.36
2.71125	-29.5091	-22.9558	20.7744	-29.5091	20.7744	50.2835	0	0	0.644945	0.644945	0.644945	6.38
2.71167	-29.4331	-22.9142	20.8051	-29.4331	20.8051	50.2382	0	0	0.64504	0.64504	0.64504	6.38
2.71208	-29.3612	-22.8617	20.8291	-29.3612	20.8291	50.1904	0	0	0.645084	0.645084	0.645084	6.38
2.7125	-29.2846	-22.7965	20.8483	-29.2846	20.8483	50.133	0	0	0.645097	0.645097	0.645097	6.38
2.71292	-29.1912	-22.7292	20.8658	-29.1912	20.8658	50.0569	0	0	0.645151	0.645151	0.645151	6.4
2.71333	-29.08	-22.6704	20.8806	-29.08	20.8806	49.9606	0	0	0.645284	0.645284	0.645284	6.4
2.71375	-28.9633	-22.6201	20.8921	-28.9633	20.8921	49.8554	0	0	0.645461	0.645461	0.645461	6.42
2.71417	-28.8554	-22.5768	20.9045	-28.8554	20.9045	49.7598	0	0	0.645637	0.645637	0.645637	6.42
2.71458	-28.7649	-22.544	20.922	-28.7649	20.922	49.6869	0	0	0.6458	0.6458	0.6458	6.44
2.715	-28.6994	-22.5179	20.9456	-28.6994	20.9456	49.6449	0	0	0.645914	0.645914	0.645914	6.44
2.71542	-28.6549	-22.4878	20.9746	-28.6549	20.9746	49.6295	0	0	0.645956	0.645956	0.645956	6.44
2.71583	-28.6154	-22.4498	21.0068	-28.6154	21.0068	49.6222	0	0	0.645958	0.645958	0.645958	6.44
2.71625	-28.5695	-22.4126	21.0365	-28.5695	21.0365	49.606	0	0	0.645981	0.645981	0.645981	6.44
2.71667	-28.518	-22.384	21.06	-28.518	21.06	49.578	0	0	0.646046	0.646046	0.646046	6.44
2.71708	-28.4617	-22.3567	21.0791	-28.4617	21.0791	49.5408	0	0	0.646128	0.646128	0.646128	6.46
2.7175	-28.394	-22.3241	21.0981	-28.394	21.0981	49.4921	0	0	0.646226	0.646226	0.646226	6.46
2.71792	-28.3145	-22.2874	21.1177	-28.3145	21.1177	49.4322	0	0	0.646345	0.646345	0.646345	6.46
2.71833	-28.2338	-22.2531	21.1359	-28.2338	21.1359	49.3698	0	0	0.646476	0.646476	0.646476	6.48
2.71875	-28.1564	-22.2225	21.1529	-28.1564	21.1529	49.3092	0	0	0.64661	0.64661	0.64661	6.48
2.71917	-28.0776	-22.19	21.1683	-28.0776	21.1683	49.2459	0	0	0.646741	0.646741	0.646741	6.5
2.71958	-27.9934	-22.152	21.1823	-27.9934	21.1823	49.1757	0	0	0.646869	0.646869	0.646869	6.5
2.72	-27.9057	-22.1112	21.1958	-27.9057	21.1958	49.1015	0	0	0.646998	0.646998	0.646998	6.5
2.72042	-27.8215	-22.0748	21.209	-27.8215	21.209	49.0305	0	0	0.647132	0.647132	0.647132	6.52
2.72083	-27.7431	-22.0428	21.2232	-27.7431	21.2232	48.9663	0	0	0.647265	0.647265	0.647265	6.52
2.72125	-27.6689	-22.007	21.2394	-27.6689	21.2394	48.9083	0	0	0.647372	0.647372	0.647372	6.54
2.72167	-27.5924	-21.963	21.2578	-27.5924	21.2578	48.8501	0	0	0.647461	0.647461	0.647461	6.54
2.72208	-27.5042	-21.9183	21.2765	-27.5042	21.2765	48.7807	0	0	0.647582	0.647582	0.647582	6.54
2.7225	-27.41	-21.8803	21.2925	-27.41	21.2925	48.7025	0	0	0.647743	0.647743	0.647743	6.56
2.72292	-27.3285	-21.8475	21.3078	-27.3285	21.3078	48.6363	0	0	0.647884	0.647884	0.647884	6.56
2.72333	-27.2715	-21.8157	21.3261	-27.2715	21.3261	48.5976	0	0	0.647956	0.647956	0.647956	6.58
2.72375	-27.2309	-21.7826	21.349	-27.2309	21.349	48.5799	0	0	0.647975	0.647975	0.647975	6.58
2.72417	-27.1903	-21.7504	21.3738	-27.1903	21.3738	48.564	0	0	0.647997	0.647997	0.647997	6.58
2.72458	-27.1518	-21.7225	21.3953	-27.1518	21.3953	48.547	0	0	0.648027	0.648027	0.648027	6.58
2.725	-27.125	-21.699	21.4115	-27.125	21.4115	48.5365	0	0	0.648034	0.648034	0.648034	6.58
2.72542	-27.0956	-21.6768	21.4229	-27.0956	21.4229	48.5185	0	0	0.648053	0.648053	0.648053	6.58
2.72583	-27.0413	-21.6559	21.4317	-27.0413	21.4317	48.473	0	0	0.64815	0.64815	0.64815	6.58
2.72625	-26.9632	-21.6394	21.4396	-26.9632	21.4396	48.4028	0	0	0.648335	0.648335	0.648335	6.6
2.72667	-26.8862	-21.6249	21.4472	-26.8862	21.4472	48.3334	0	0	0.648525	0.648525	0.648525	6.6
2.72708	-26.835	-21.6033	21.4558	-26.835	21.4558	48.2908	0	0	0.64861	0.64861	0.64861	6.62
2.7275	-26.8125	-21.5713	21.4662	-26.8125	21.4662	48.2787	0	0	0.648573	0.648573	0.648573	6.6
2.72792	-26.8085	-21.5346	21.4783	-26.8085	21.4783	48.2868	0	0	0.648463	0.648463	0.648463	6.6
2.72833	-26.8108	-21.4968	21.4901	-26.8108	21.4901	48.3009	0	0	0.64833	0.64833	0.64833	6.6
2.72875	-26.8092	-21.4584	21.4981	-26.8092	21.4981	48.3073	0	0	0.648206	0.648206	0.648206	6.58
2.72917	-26.8015	-21.421	21.5021	-26.8015	21.5021	48.3036	0	0	0.648102	0.648102	0.648102	6.58
2.72958	-26.7791	-21.3884	21.504	-26.7791	21.504	48.2831	0	0	0.648059	0.648059	0.648059	6.58
2.73	-26.7293	-21.3594	21.5063	-26.7293	21.5063	48.2356	0	0	0.648112	0.648112	0.648112	6.58
2.73042	-26.6526	-21.331	21.5081	-26.6526	21.5081	48.1607	0	0	0.64825	0.64825	0.64825	6.6
2.73083	-26.5611	-21.3004	21.5077	-26.5611	21.5077	48.0688	0	0	0.648426	0.648426	0.648426	6.6
2.73125	-26.4727	-21.2657	21.5071	-26.4727	21.5071	47.9797	0	0	0.648579	0.648579	0.648579	6.6
2.73167	-26.3938	-21.2306	21.508	-26.3938	21.508	47.9017	0	0	0.648702	0.648702	0.648702	6.62
2.73208	-26.3221	-21.2007	21.5141	-26.3221	21.5141	47.8362	0	0	0.648823	0.648823	0.648823	6.62
2.7325	-26.2577	-21.1791	21.5251	-26.2577	21.5251	47.7828	0	0	0.648953	0.648953	0.648953	6.62
2.73292	-26.1997	-21.1602	21.5377	-26.1997	21.5377	47.7374	0	0	0.649072	0.649072	0.649072	6.64
2.73333	-26.1496	-21.144	21.55	-26.1496	21.55	47.6996	0	0	0.649177	0.649177	0.649177	6.64
2.73375	-26.1099	-21.1357	21.5627	-26.1099	21.5627	47.6726	0	0	0.649277	0.649277	0.649277	6.64
2.73417	-26.0799	-21.1293	21.5798	-26.0799	21.5798	47.6596	0	0	0.649354	0.649354	0.649354	6.66
2.73458	-26.0504	-21.1117	21.5992	-26.0504	21.5992	47.6497	0	0	0.649392	0.649392	0.649392	6.66
2.735	-26.0107	-21.0793	21.6178	-26.0107	21.6178	47.6284	0	0	0.64941	0.64941	0.64941	6.66
2.73542	-25.9631	-21.0463	21.635	-25.9631	21.635	47.5981	0	0	0.64945	0.64945	0.64945	6.66
2.73583	-25.9255	-21.0205	21.6515	-25.9255	21.6515	47.577	0	0	0.649484	0.649484	0.649484	6.66
2.73625	-25.8994	-20.9959	21.6658	-25.8994	21.6658	47.5652	0	0	0.649485	0.649485	0.649485	6.66
2.73667	-25.864	-20.9682	21.6754	-25.864	21.6754	47.5395	0	0	0.649503	0.649503	0.649503	6.66
2.73708	-25.8156	-20.9422	21.6796	-25.8156	21.6796	47.4952	0	0	0.649565	0.649565	0.649565	6.66
2.7375	-25.7719	-20.9227	21.6764	-25.7719	21.6764	47.4483	0	0	0.649633	0.649633	0.649633	6.66
2.73792	-25.7445	-20.9051	21.6652	-25.7445	21.6652	47.4097	0	0	0.649654	0.649654	0.649654	6.66
2.73833	-25.7188	-20.8832	21.6505	-25.7188	21.6505	47.3692	0	0	0.649653	0.649653	0.649653	6.66
2.73875	-25.6806	-20.8569	21.6406	-25.6806	21.6406	47.3212	0	0	0.649677	0.649677	0.649677	6.66
2.73917	-25.6419	-20.8295	21.6403	-25.6419	21.6403	47.2822	0	0	0.649703	0.649703	0.649703	6.66
2.73958	-25.6119	-20.8076	21.6478	-25.6119	21.6478	47.2596	0	0	0.649724	0.649724	0.649724	6.68
2.74	-25.5791	-20.7916	21.6614	-25.5791	21.6614	47.2405	0	0	0.649776	0.649776	0.649776	6.68
2.74042	-25.5323	-20.7754	21.6813	-25.5323	21.6813	47.2136	0	0	0.649875	0.649875	0.649875	6.68
2.74083	-25.4749	-20.7521	21.7055	-25.4749	21.7055	47.1804	0	0	0.649983	0.649983	0.649983	6.68
2.74125	-25.4156	-20.7237	21.7289	-25.4156	21.7289	47.1445	0	0	0.65008	0.65008	0.65008	6.68
2.74167	-25.3537	-20.7027	21.745	-25.3537	21.745	47.0987	0	0	0.650208	0.650208	0.650208	6.7
2.74208	-25.2859	-20.6859	21.7505	-25.2859	21.7505	47.0363	0	0	0.650367	0.650367	0.650367	6.7
2.7425	-25.2181	-20.6629	21.7473	-25.2181	21.7473	46.9654	0	0	0.650502	0.650502	0.650502	6.72
2.74292	-25.1581	-20.6323	21.7405	-25.1581	21.7405	46.8986	0	0	0.650583	0.650583	0.650583	6.72
2.74333	-25.1089	-20.6055	21.7359	-25.1089	21.7359	46.8448	0	0	0.650644	0.650644	0.650644	6.72
2.74375	-25.0726	-20.5921	21.7337	-25.0726	21.7337	46.8064	0	0	0.650713	0.650713	0.650713	6.72
2.74417	-25.0505	-20.5813	21.7322	-25.0505	21.7322	46.7827	0	0	0.650745	0.650745	0.650745	6.72
2.74458	-25.0356	-20.5648	21.7337	-25.0356	21.7337	46.7693	0	0	0.650735	0.650735	0.650735	6.72
2.745	-25.021	-20.5449	21.7417	-25.021	21.7417	46.7627	0	0	0.650713	0.650713	0.650713	6.72
2.74542	-25.0071	-20.5257	21.7556	-25.0071	21.7556	46.7626	0	0	0.650695	0.650695	0.650695	6.72
2.74583	-24.9958	-20.5051	21.7671	-24.9958	21.7671	46.7629	0	0	0.650661	0.650661	0.650661	6.72
2.74625	-24.9818	-20.4785	21.7721	-24.9818	21.7721	46.754	0	0	0.650613	0.650613	0.650613	6.72
2.74667	-24.9548	-20.4483	21.7733	-24.9548	21.7733	46.728	0	0	0.650593	0.650593	0.650593	6.72
2.74708	-24.917	-20.4187	21.7743	-24.917	21.7743	46.6913	0	0	0.65061	0.65061	0.65061	6.72
2.7475	-24.8744	-20.3953	21.7741	-24.8744	21.7741	46.6485	0	0	0.650664	0.650664	0.650664	6.72
2.74792	-24.8241	-20.3849	21.7698	-24.8241	21.7698	46.5939	0	0	0.650788	0.650788	0.650788	6.72
2.74833	-24.7649	-20.3896	21.763	-24.7649	21.763	46.5279	0	0	0.650994	0.650994	0.650994	6.74
2.74875	-24.7083	-20.4	21.7573	-24.7083	21.7573	46.4656	0	0	0.651213	0.651213	0.651213	6.76
2.74917	-24.6661	-20.4041	21.7543	-24.6661	21.7543	46.4204	0	0	0.651365	0.651365	0.651365	6.76
2.74958	-24.6367	-20.4005	21.7516	-24.6367	21.7516	46.3883	0	0	0.651447	0.651447	0.651447	6.76
2.75	-24.6108	-20.3922	21.7517	-24.6108	21.7517	46.3625	0	0	0.651501	0.651501	0.651501	6.76
2.75042	-24.5877	-20.3771	21.7576	-24.5877	21.7576	46.3453	0	0	0.651524	0.651524	0.651524	6.76
2.75083	-24.5691	-20.35	21.7696	-24.5691	21.7696	46.3387	0	0	0.651492	0.651492	0.651492	6.76
2.75125	-24.5436	-20.314	21.7827	-24.5436	21.7827	46.3263	0	0	0.65145	0.65145	0.65145	6.76
2.75167	-24.5063	-20.2809	21.7951	-24.5063	21.7951	46.3014	0	0	0.651457	0.651457	0.651457	6.76
2.75208	-24.4585	-20.2566	21.8102	-24.4585	21.8102	46.2688	0	0	0.651531	0.651531	0.651531	6.76
2.7525	-24.4088	-20.2383	21.8244	-24.4088	21.8244	46.2333	0	0	0.651633	0.651633	0.651633	6.78
2.75292	-24.3654	-20.2233	21.8331	-24.3654	21.8331	46.1986	0	0	0.651724	0.651724	0.651724	6.78
2.75333	-24.3286	-20.2109	21.837	-24.3286	21.837	46.1656	0	0	0.651801	0.651801	0.651801	6.78
2.75375	-24.2975	-20.2023	21.843	-24.2975	21.843	46.1405	0	0	0.651874	0.651874	0.651874	6.78
2.75417	-24.2687	-20.198	21.8501	-24.2687	21.8501	46.1188	0	0	0.651956	0.651956	0.651956	6.8
2.75458	-24.2473	-20.198	21.8538	-24.2473	21.8538	46.101	0	0	0.652028	0.652028	0.652028	6.8
2.755	-24.2432	-20.1999	21.8561	-24.2432	21.8561	46.0992	0	0	0.652049	0.652049	0.652049	6.8
2.75542	-24.2505	-20.1991	21.861	-24.2505	21.861	46.1115	0	0	0.652023	0.652023	0.652023	6.8
2.75583	-24.2527	-20.1959	21.8681	-24.2527	21.8681	46.1209	0	0	0.652007	0.652007	0.652007	6.8
2.75625	-24.2435	-20.1894	21.8732	-24.2435	21.8732	46.1167	0	0	0.652015	0.652015	0.652015	6.8
2.75667	-24.2281	-20.176	21.8771	-24.2281	21.8771	46.1052	0	0	0.652019	0.652019	0.652019	6.8
2.75708	-24.2126	-20.1535	21.8806	-24.2126	21.8806	46.0932	0	0	0.651989	0.651989	0.651989	6.8
2.7575	-24.1877	-20.1243	21.8814	-24.1877	21.8814	46.0691	0	0	0.651966	0.651966	0.651966	6.8
2.75792	-24.1352	-20.0953	21.8805	-24.1352	21.8805	46.0157	0	0	0.652034	0.652034	0.652034	6.8
2.75833	-24.0563	-20.0701	21.8813	-24.0563	21.8813	45.9376	0	0	0.652205	0.652205	0.652205	6.8
2.75875	-23.9749	-20.0535	21.8837	-23.9749	21.8837	45.8587	0	0	0.652415	0.652415	0.652415	6.8
2.75917	-23.9166	-20.0459	21.8855	-23.9166	21.8855	45.8021	0	0	0.652582	0.652582	0.652582	6.82
2.75958	-23.8836	-20.0433	21.8882	-23.8836	21.8882	45.7718	0	0	0.652683	0.652683	0.652683	6.82
2.76	-23.8582	-20.043	21.8953	-23.8582	21.8953	45.7534	0	0	0.652769	0.652769	0.652769	6.82
2.76042	-23.836	-20.0444	21.9041	-23.836	21.9041	45.7401	0	0	0.652851	0.652851	0.652851	6.82
2.76083	-23.8257	-20.0457	21.9083	-23.8257	21.9083	45.734	0	0	0.652892	0.652892	0.652892	6.82
2.76125	-23.8217	-20.0429	21.9074	-23.8217	21.9074	45.7291	0	0	0.652894	0.652894	0.652894	6.82
2.76167	-23.8056	-20.0349	21.9055	-23.8056	21.9055	45.7111	0	0	0.652918	0.652918	0.652918	6.84
2.76208	-23.7661	-20.0219	21.9052	-23.7661	21.9052	45.6713	0	0	0.653003	0.653003	0.653003	6.84
2.7625	-23.7181	-20.0035	21.9065	-23.7181	21.9065	45.6246	0	0	0.653097	0.653097	0.653097	6.84
2.76292	-23.6809	-19.9776	21.9082	-23.6809	21.9082	45.5891	0	0	0.653128	0.653128	0.653128	6.84
2.76333	-23.6554	-19.9469	21.9125	-23.6554	21.9125	45.5679	0	0	0.653103	0.653103	0.653103	6.84
2.76375	-23.628	-19.9148	21.9225	-23.628	21.9225	45.5505	0	0	0.65308	0.65308	0.65308	6.84
2.76417	-23.5869	-19.8831	21.9389	-23.5869	21.9389	45.5258	0	0	0.653107	0.653107	0.653107	6.84
2.76458	-23.5388	-19.8585	21.9598	-23.5388	21.9598	45.4986	0	0	0.653185	0.653185	0.653185	6.84
2.765	-23.5018	-19.8484	21.9817	-23.5018	21.9817	45.4835	0	0	0.653279	0.653279	0.653279	6.84
2.76542	-23.4864	-19.8567	22.0023	-23.4864	22.0023	45.4887	0	0	0.653368	0.653368	0.653368	6.84
2.76583	-23.4834	-19.8779	22.0187	-23.4834	22.0187	45.5021	0	0	0.65346	0.65346	0.65346	6.86
2.76625	-23.4856	-19.8998	22.0298	-23.4856	22.0298	45.5154	0	0	0.653536	0.653536	0.653536	6.86
2.76667	-23.4992	-19.9128	22.0378	-23.4992	22.0378	45.5371	0	0	0.65354	0.65354	0.65354	6.86
2.76708	-23.5227	-19.9141	22.0456	-23.5227	22.0456	45.5683	0	0	0.653468	0.653468	0.653468	6.86
2.7675	-23.5428	-19.9075	22.0523	-23.5428	22.0523	45.5951	0	0	0.653379	0.653379	0.653379	6.84
2.76792	-23.5469	-19.8961	22.0577	-23.5469	22.0577	45.6047	0	0	0.653324	0.653324	0.653324	6.84
2.76833	-23.5403	-19.876	22.0678	-23.5403	22.0678	45.6081	0	0	0.653276	0.653276	0.653276	6.84
2.76875	-23.5341	-19.8495	22.0853	-23.5341	22.0853	45.6194	0	0	0.653205	0.653205	0.653205	6.84
2.76917	-23.527	-19.8268	22.1046	-23.527	22.1046	45.6315	0	0	0.653152	0.653152	0.653152	6.84
2.76958	-23.5095	-19.814	22.1183	-23.5095	22.1183	45.6278	0	0	0.653168	0.653168	0.653168	6.84
2.77	-23.4788	-19.8075	22.1258	-23.4788	22.1258	45.6047	0	0	0.653249	0.653249	0.653249	6.84
2.77042	-23.4496	-19.8016	22.1316	-23.4496	22.1316	45.5813	0	0	0.653328	0.653328	0.653328	6.84
2.77083	-23.4329	-19.7986	22.1367	-23.4329	22.1367	45.5696	0	0	0.653374	0.653374	0.653374	6.84
2.77125	-23.4168	-19.7994	22.1406	-23.4168	22.1406	45.5574	0	0	0.653433	0.653433	0.653433	6.86
2.77167	-23.3895	-19.8027	22.1438	-23.3895	22.1438	45.5333	0	0	0.653538	0.653538	0.653538	6.86
2.77208	-23.3602	-19.8087	22.1482	-23.3602	22.1482	45.5084	0	0	0.65366	0.65366	0.65366	6.86
2.7725	-23.3373	-19.8145	22.1559	-23.3373	22.1559	45.4932	0	0	0.65376	0.65376	0.65376	6.86
2.77292	-23.308	-19.8099	22.166	-23.308	22.166	45.474	0	0	0.653846	0.653846	0.653846	6.86
2.77333	-23.2636	-19.7909	22.1743	-23.2636	22.1743	45.4379	0	0	0.653929	0.653929	0.653929	6.88
2.77375	-23.2228	-19.766	22.1762	-23.2228	22.1762	45.399	0	0	0.653976	0.653976	0.653976	6.88
2.77417	-23.2037	-19.7436	22.1723	-23.2037	22.1723	45.376	0	0	0.653958	0.653958	0.653958	6.88
2.77458	-23.1937	-19.7207	22.1672	-23.1937	22.1672	45.3608	0	0	0.653906	0.653906	0.653906	6.88
2.775	-23.1747	-19.6935	22.1632	-23.1747	22.1632	45.3379	0	0	0.65387	0.65387	0.65387	6.88
2.77542	-23.1507	-19.6678	22.1601	-23.1507	22.1601	45.3108	0	0	0.653856	0.653856	0.653856	6.86
2.77583	-23.1316	-19.6483	22.1584	-23.1316	22.1584	45.29	0	0	0.653848	0.653848	0.653848	6.86
2.77625	-23.1123	-19.6326	22.1592	-23.1123	22.1592	45.2715	0	0	0.653856	0.653856	0.653856	6.86
2.77667	-23.0876	-19.617	22.1606	-23.0876	22.1606	45.2482	0	0	0.653883	0.653883	0.653883	6.88
2.77708	-23.0628	-19.6039	22.159	-23.0628	22.159	45.2218	0	0	0.653919	0.653919	0.653919	6.88
2.7775	-23.043	-19.5966	22.156	-23.043	22.156	45.199	0	0	0.653958	0.653958	0.653958	6.88
2.77792	-23.0223	-19.5945	22.1561	-23.0223	22.1561	45.1785	0	0	0.654021	0.654021	0.654021	6.88
2.77833	-22.9976	-19.5992	22.1597	-22.9976	22.1597	45.1572	0	0	0.654124	0.654124	0.654124	6.88
2.77875	-22.9747	-19.6119	22.1643	-22.9747	22.1643	45.139	0	0	0.65425	0.65425	0.65425	6.88
2.77917	-22.9492	-19.6255	22.1713	-22.9492	22.1713	45.1205	0	0	0.65439	0.65439	0.65439	6.9
2.77958	-22.9221	-19.6289	22.183	-22.9221	22.183	45.105	0	0	0.654498	0.654498	0.654498	6.9
2.78	-22.8996	-19.6211	22.1953	-22.8996	22.1953	45.0949	0	0	0.65455	0.65455	0.65455	6.9
2.78042	-22.8834	-19.6138	22.2007	-22.8834	22.2007	45.0841	0	0	0.654579	0.654579	0.654579	6.9
2.78083	-22.8677	-19.612	22.1999	-22.8677	22.1999	45.0677	0	0	0.654627	0.654627	0.654627	6.9
2.78125	-22.8502	-19.6101	22.1983	-22.8502	22.1983	45.0485	0	0	0.654679	0.654679	0.654679	6.9
2.78167	-22.8391	-19.6049	22.1964	-22.8391	22.1964	45.0355	0	0	0.654698	0.654698	0.654698	6.9
2.78208	-22.8281	-19.599	22.1898	-22.8281	22.1898	45.0179	0	0	0.654712	0.654712	0.654712	6.9
2.7825	-22.8065	-19.5947	22.1806	-22.8065	22.1806	44.9871	0	0	0.654767	0.654767	0.654767	6.9
2.78292	-22.7763	-19.5863	22.1765	-22.7763	22.1765	44.9528	0	0	0.654839	0.654839	0.654839	6.92
2.78333	-22.7453	-19.5688	22.1782	-22.7453	22.1782	44.9236	0	0	0.654882	0.654882	0.654882	6.92
2.78375	-22.7117	-19.5457	22.1817	-22.7117	22.1817	44.8934	0	0	0.654913	0.654913	0.654913	6.92
2.78417	-22.6698	-19.523	22.1845	-22.6698	22.1845	44.8543	0	0	0.654974	0.654974	0.654974	6.92
2.78458	-22.6307	-19.505	22.1899	-22.6307	22.1899	44.8206	0	0	0.655044	0.655044	0.655044	6.92
2.785	-22.6083	-19.4898	22.1965	-22.6083	22.1965	44.8048	0	0	0.655066	0.655066	0.655066	6.92
2.78542	-22.6008	-19.4783	22.197	-22.6008	22.197	44.7978	0	0	0.65505	0.65505	0.65505	6.92
2.78583	-22.5944	-19.4747	22.1895	-22.5944	22.1895	44.7839	0	0	0.655057	0.655057	0.655057	6.92
2.78625	-22.5815	-19.479	22.1791	-22.5815	22.1791	44.7606	0	0	0.655115	0.655115	0.655115	6.92
2.78667	-22.5676	-19.4835	22.1731	-22.5676	22.1731	44.7407	0	0	0.655178	0.655178	0.655178	6.92
2.78708	-22.556	-19.4797	22.1734	-22.556	22.1734	44.7294	0	0	0.655204	0.655204	0.655204	6.92
2.7875	-22.544	-19.4682	22.176	-22.544	22.176	44.7199	0	0	0.655204	0.655204	0.655204	6.92
2.78792	-22.5258	-19.4527	22.1782	-22.5258	22.1782	44.704	0	0	0.655209	0.655209	0.655209	6.92
2.78833	-22.5012	-19.4335	22.18	-22.5012	22.18	44.6812	0	0	0.655224	0.655224	0.655224	6.92
2.78875	-22.4779	-19.411	22.1808	-22.4779	22.1808	44.6587	0	0	0.655221	0.655221	0.655221	6.92
2.78917	-22.465	-19.3921	22.1769	-22.465	22.1769	44.6419	0	0	0.655194	0.655194	0.655194	6.92
2.78958	-22.4652	-19.3815	22.1667	-22.4652	22.1667	44.6319	0	0	0.655151	0.655151	0.655151	6.92
2.79	-22.4695	-19.3783	22.1548	-22.4695	22.1548	44.6244	0	0	0.655121	0.655121	0.655121	6.92
2.79042	-22.4729	-19.3738	22.1475	-22.4729	22.1475	44.6204	0	0	0.655091	0.655091	0.655091	6.92
2.79083	-22.4776	-19.3625	22.1469	-22.4776	22.1469	44.6244	0	0	0.655032	0.655032	0.655032	6.92
2.79125	-22.4794	-19.3484	22.1522	-22.4794	22.1522	44.6316	0	0	0.654975	0.654975	0.654975	6.92
2.79167	-22.4649	-19.3357	22.1625	-22.4649	22.1625	44.6273	0	0	0.65498	0.65498	0.65498	6.92
2.79208	-22.4253	-19.326	22.1746	-22.4253	22.1746	44.5999	0	0	0.655085	0.655085	0.655085	6.92
2.7925	-22.3738	-19.3162	22.1849	-22.3738	22.1849	44.5587	0	0	0.65523	0.65523	0.65523	6.92
2.79292	-22.3297	-19.3115	22.1916	-22.3297	22.1916	44.5213	0	0	0.655368	0.655368	0.655368	6.94
2.79333	-22.2968	-19.3145	22.1969	-22.2968	22.1969	44.4938	0	0	0.655496	0.655496	0.655496	6.94
2.79375	-22.2683	-19.3147	22.2044	-22.2683	22.2044	44.4727	0	0	0.655598	0.655598	0.655598	6.94
2.79417	-22.2378	-19.3054	22.2145	-22.2378	22.2145	44.4523	0	0	0.655672	0.655672	0.655672	6.94
2.79458	-22.2013	-19.2929	22.2249	-22.2013	22.2249	44.4262	0	0	0.655756	0.655756	0.655756	6.94
2.795	-22.1576	-19.2906	22.2334	-22.1576	22.2334	44.391	0	0	0.655903	0.655903	0.655903	6.96
2.79542	-22.1113	-19.2982	22.2412	-22.1113	22.2412	44.3524	0	0	0.656096	0.656096	0.656096	6.96
2.79583	-22.0763	-19.308	22.2484	-22.0763	22.2484	44.3247	0	0	0.656257	0.656257	0.656257	6.96
2.79625	-22.0609	-19.3184	22.2515	-22.0609	22.2515	44.3124	0	0	0.656352	0.656352	0.656352	6.98
2.79667	-22.0601	-19.3249	22.2474	-22.0601	22.2474	44.3075	0	0	0.656378	0.656378	0.656378	6.98
2.79708	-22.0724	-19.3215	22.2412	-22.0724	22.2412	44.3136	0	0	0.65632	0.65632	0.65632	6.98
2.7975	-22.1003	-19.3063	22.2397	-22.1003	22.2397	44.34	0	0	0.656164	0.656164	0.656164	6.96
2.79792	-22.1398	-19.2867	22.2417	-22.1398	22.2417	44.3815	0	0	0.655952	0.655952	0.655952	6.96
2.79833	-22.1732	-19.2694	22.2409	-22.1732	22.2409	44.4141	0	0	0.65577	0.65577	0.65577	6.94
2.79875	-22.1864	-19.2553	22.2376	-22.1864	22.2376	44.4239	0	0	0.65567	0.65567	0.65567	6.94
2.79917	-22.1848	-19.2446	22.2365	-22.1848	22.2365	44.4212	0	0	0.655635	0.655635	0.655635	6.94
2.79958	-22.175	-19.2391	22.2378	-22.175	22.2378	44.4128	0	0	0.655649	0.655649	0.655649	6.94
2.8	-22.1549	-19.2383	22.2377	-22.1549	22.2377	44.3926	0	0	0.655716	0.655716	0.655716	6.94
2.80042	-22.1166	-19.2341	22.2362	-22.1166	22.2362	44.3528	0	0	0.655835	0.655835	0.655835	6.96
2.80083	-22.0652	-19.2231	22.2351	-22.0652	22.2351	44.3002	0	0	0.655974	0.655974	0.655974	6.96
2.80125	-22.0187	-19.2127	22.2334	-22.0187	22.2334	44.252	0	0	0.656099	0.656099	0.656099	6.96
2.80167	-21.9861	-19.2145	22.2283	-21.9861	22.2283	44.2145	0	0	0.656219	0.656219	0.656219	6.96
2.80208	-21.9622	-19.227	22.2203	-21.9622	22.2203	44.1825	0	0	0.656349	0.656349	0.656349	6.98
2.8025	-21.9351	-19.2336	22.2144	-21.9351	22.2144	44.1495	0	0	0.656468	0.656468	0.656468	6.98
2.80292	-21.9003	-19.2246	22.2129	-21.9003	22.2129	44.1132	0	0	0.656557	0.656557	0.656557	6.98
2.80333	-21.8602	-19.2049	22.2146	-21.8602	22.2146	44.0748	0	0	0.656626	0.656626	0.656626	6.98
2.80375	-21.8155	-19.1865	22.2149	-21.8155	22.2149	44.0304	0	0	0.656715	0.656715	0.656715	6.98
2.80417	-21.7715	-19.1694	22.2126	-21.7715	22.2126	43.9841	0	0	0.656807	0.656807	0.656807	7
2.80458	-21.7362	-19.1481	22.2104	-21.7362	22.2104	43.9465	0	0	0.656851	0.656851	0.656851	7
2.805	-21.716	-19.1271	22.2068	-21.716	22.2068	43.9229	0	0	0.656843	0.656843	0.656843	7
2.80542	-21.7138	-19.1182	22.2002	-21.7138	22.2002	43.9141	0	0	0.656816	0.656816	0.656816	7
2.80583	-21.728	-19.1257	22.1905	-21.728	22.1905	43.9185	0	0	0.656791	0.656791	0.656791	7
2.80625	-21.7573	-19.136	22.1828	-21.7573	22.1828	43.9401	0	0	0.656724	0.656724	0.656724	6.98
2.80667	-21.7922	-19.1407	22.1801	-21.7922	22.1801	43.9724	0	0	0.656617	0.656617	0.656617	6.98
2.80708	-21.8159	-19.1427	22.1794	-21.8159	22.1794	43.9953	0	0	0.65654	0.65654	0.65654	6.98
2.8075	-21.8179	-19.1449	22.1784	-21.8179	22.1784	43.9963	0	0	0.656541	0.656541	0.656541	6.98
2.80792	-21.8003	-19.1412	22.179	-21.8003	22.179	43.9793	0	0	0.65659	0.65659	0.65659	6.98
2.80833	-21.7718	-19.1268	22.1829	-21.7718	22.1829	43.9547	0	0	0.656637	0.656637	0.656637	6.98
2.80875	-21.7349	-19.1073	22.1875	-21.7349	22.1875	43.9223	0	0	0.656696	0.656696	0.656696	6.98
2.80917	-21.6903	-19.0907	22.1905	-21.6903	22.1905	43.8809	0	0	0.656793	0.656793	0.656793	7
2.80958	-21.6493	-19.0825	22.1936	-21.6493	22.1936	43.8429	0	0	0.656909	0.656909	0.656909	7
2.81	-21.6218	-19.0841	22.1964	-21.6218	22.1964	43.8182	0	0	0.657014	0.657014	0.657014	7
2.81042	-21.6075	-19.0931	22.197	-21.6075	22.197	43.8045	0	0	0.6571	0.6571	0.6571	7
2.81083	-21.599	-19.1029	22.1963	-21.599	22.1963	43.7953	0	0	0.657168	0.657168	0.657168	7
2.81125	-21.5936	-19.1088	22.1969	-21.5936	22.1969	43.7905	0	0	0.657209	0.657209	0.657209	7
2.81167	-21.5868	-19.1054	22.2002	-21.5868	22.2002	43.7869	0	0	0.657222	0.657222	0.657222	7
2.81208	-21.5752	-19.0896	22.2044	-21.5752	22.2044	43.7796	0	0	0.657204	0.657204	0.657204	7
2.8125	-21.5622	-19.0669	22.2076	-21.5622	22.2076	43.7698	0	0	0.657165	0.657165	0.657165	7
2.81292	-21.5527	-19.0472	22.2071	-21.5527	22.2071	43.7598	0	0	0.657124	0.657124	0.657124	7
2.81333	-21.5483	-19.032	22.2028	-21.5483	22.2028	43.7511	0	0	0.657081	0.657081	0.657081	7
2.81375	-21.5426	-19.0177	22.1998	-21.5426	22.1998	43.7424	0	0	0.657046	0.657046	0.657046	7
2.81417	-21.5388	-19.0087	22.1997	-21.5388	22.1997	43.7384	0	0	0.657026	0.657026	0.657026	7
2.81458	-21.5447	-19.0073	22.199	-21.5447	22.199	43.7437	0	0	0.656999	0.656999	0.656999	7
2.815	-21.5615	-19.0071	22.1971	-21.5615	22.1971	43.7586	0	0	0.656937	0.656937	0.656937	7
2.81542	-21.5742	-19.0006	22.1998	-21.5742	22.1998	43.774	0	0	0.656868	0.656868	0.656868	7
2.81583	-21.5597	-18.9921	22.2114	-21.5597	22.2114	43.771	0	0	0.65689	0.65689	0.65689	7
2.81625	-21.5193	-18.9895	22.2253	-21.5193	22.2253	43.7446	0	0	0.657028	0.657028	0.657028	7
2.81667	-21.4804	-18.9925	22.2328	-21.4804	22.2328	43.7132	0	0	0.657181	0.657181	0.657181	7
2.81708	-21.4559	-18.9991	22.2326	-21.4559	22.2326	43.6885	0	0	0.657294	0.657294	0.657294	7.02
2.8175	-21.4331	-19.0053	22.2299	-21.4331	22.2299	43.663	0	0	0.6574	0.6574	0.6574	7.02
2.81792	-21.3995	-19.0075	22.2285	-21.3995	22.2285	43.628	0	0	0.657529	0.657529	0.657529	7.02
2.81833	-21.3664	-19.0043	22.2254	-21.3664	22.2254	43.5918	0	0	0.657635	0.657635	0.657635	7.02
2.81875	-21.3485	-18.9951	22.2172	-21.3485	22.2172	43.5657	0	0	0.657663	0.657663	0.657663	7.02
2.81917	-21.3382	-18.9781	22.2055	-21.3382	22.2055	43.5437	0	0	0.657633	0.657633	0.657633	7.02
2.81958	-21.3243	-18.9529	22.193	-21.3243	22.193	43.5173	0	0	0.657584	0.657584	0.657584	7.02
2.82	-21.3046	-18.9257	22.1804	-21.3046	22.1804	43.485	0	0	0.657549	0.657549	0.657549	7.02
2.82042	-21.2904	-18.9053	22.1656	-21.2904	22.1656	43.456	0	0	0.657519	0.657519	0.657519	7.02
2.82083	-21.2957	-18.8963	22.1511	-21.2957	22.1511	43.4468	0	0	0.657462	0.657462	0.657462	7.02
2.82125	-21.3113	-18.8947	22.1418	-21.3113	22.1418	43.4531	0	0	0.657398	0.657398	0.657398	7.02
2.82167	-21.3132	-18.8958	22.1395	-21.3132	22.1395	43.4527	0	0	0.657395	0.657395	0.657395	7.02
2.82208	-21.2875	-18.8997	22.1452	-21.2875	22.1452	43.4327	0	0	0.657504	0.657504	0.657504	7.02
2.8225	-21.2453	-18.9089	22.1571	-21.2453	22.1571	43.4024	0	0	0.657695	0.657695	0.657695	7.02
2.82292	-21.2139	-18.9211	22.1719	-21.2139	22.1719	43.3858	0	0	0.657859	0.657859	0.657859	7.04
2.82333	-21.2055	-18.9279	22.1841	-21.2055	22.1841	43.3896	0	0	0.657918	0.657918	0.657918	7.04
2.82375	-21.2172	-18.9273	22.1905	-21.2172	22.1905	43.4077	0	0	0.657874	0.657874	0.657874	7.04
2.82417	-21.2364	-18.9201	22.1948	-21.2364	22.1948	43.4312	0	0	0.657778	0.657778	0.657778	7.02
2.82458	-21.2521	-18.9077	22.1974	-21.2521	22.1974	43.4495	0	0	0.657674	0.657674	0.657674	7.02
2.825	-21.2684	-18.8907	22.1946	-21.2684	22.1946	43.463	0	0	0.657549	0.657549	0.657549	7.02
2.82542	-21.2807	-18.8715	22.1855	-21.2807	22.1855	43.4662	0	0	0.657429	0.657429	0.657429	7.02
2.82583	-21.2723	-18.8544	22.1765	-21.2723	22.1765	43.4488	0	0	0.657392	0.657392	0.657392	7.02
2.82625	-21.2435	-18.8451	22.1739	-21.2435	22.1739	43.4173	0	0	0.65746	0.65746	0.65746	7.02
2.82667	-21.2196	-18.8489	22.1745	-21.2196	22.1745	43.3941	0	0	0.657561	0.657561	0.657561	7.02
2.82708	-21.2237	-18.8623	22.1731	-21.2237	22.1731	43.3968	0	0	0.657598	0.657598	0.657598	7.02
2.8275	-21.2429	-18.8721	22.1711	-21.2429	22.1711	43.4139	0	0	0.657565	0.657565	0.657565	7.02
2.82792	-21.2481	-18.8687	22.1701	-21.2481	22.1701	43.4182	0	0	0.657533	0.657533	0.657533	7.02
2.82833	-21.226	-18.8548	22.1674	-21.226	22.1674	43.3934	0	0	0.657559	0.657559	0.657559	7.02
2.82875	-21.1794	-18.8361	22.1598	-21.1794	22.1598	43.3392	0	0	0.657655	0.657655	0.657655	7.02
2.82917	-21.1208	-18.8171	22.1512	-21.1208	22.1512	43.272	0	0	0.657794	0.657794	0.657794	7.04
2.82958	-21.0653	-18.8015	22.1481	-21.0653	22.1481	43.2134	0	0	0.657935	0.657935	0.657935	7.04
2.83	-21.0272	-18.791	22.1512	-21.0272	22.1512	43.1784	0	0	0.658035	0.658035	0.658035	7.04
2.83042	-21.0112	-18.782	22.1568	-21.0112	22.1568	43.168	0	0	0.65806	0.65806	0.65806	7.04
2.83083	-21.0159	-18.7697	22.163	-21.0159	22.163	43.1789	0	0	0.657997	0.657997	0.657997	7.04
2.83125	-21.038	-18.754	22.1687	-21.038	22.1687	43.2067	0	0	0.657856	0.657856	0.657856	7.04
2.83167	-21.0682	-18.737	22.1709	-21.0682	22.1709	43.2391	0	0	0.657681	0.657681	0.657681	7.02
[truncated: 403 more rows]

## Sheet: Calculator
	Inputs		UV signals must be exported in .CSV or ASCII format to have access to the Time axis (x axis) and Absorbance (y axis).
	Outputs
	Absorbance (mAU)
Time	640 nm	520 nm	452 nm	Min	Max	Range	H red	H green	H blue	H	H mod	pH
				0	0	0	0	0	0	0	0	#N/A
				0	0	0	0	0	0	0	0	#N/A
				0	0	0	0	0	0	0	0	#N/A
				0	0	0	0	0	0	0	0	#N/A
				0	0	0	0	0	0	0	0	#N/A
				0	0	0	0	0	0	0	0	#N/A
				0	0	0	0	0	0	0	0	#N/A
				0	0	0	0	0	0	0	0	#N/A
				0	0	0	0	0	0	0	0	#N/A
				0	0	0	0	0	0	0	0	#N/A
				0	0	0	0	0	0	0	0	#N/A
				0	0	0	0	0	0	0	0	#N/A
				0	0	0	0	0	0	0	0	#N/A
				0	0	0	0	0	0	0	0	#N/A
				0	0	0	0	0	0	0	0	#N/A
				0	0	0	0	0	0	0	0	#N/A
				0	0	0	0	0	0	0	0	#N/A
				0	0	0	0	0	0	0	0	#N/A
				0	0	0	0	0	0	0	0	#N/A
				0	0	0	0	0	0	0	0	#N/A
				0	0	0	0	0	0	0	0	#N/A
				0	0	0	0	0	0	0	0	#N/A
				0	0	0	0	0	0	0	0	#N/A
				0	0	0	0	0	0	0	0	#N/A
				0	0	0	0	0	0	0	0	#N/A
				0	0	0	0	0	0	0	0	#N/A
				0	0	0	0	0	0	0	0	#N/A
				0	0	0	0	0	0	0	0	#N/A
				0	0	0	0	0	0	0	0	#N/A
				0	0	0	0	0	0	0	0	#N/A
				0	0	0	0	0	0	0	0	#N/A
				0	0	0	0	0	0	0	0	#N/A
				0	0	0	0	0	0	0	0	#N/A
				0	0	0	0	0	0	0	0	#N/A
				0	0	0	0	0	0	0	0	#N/A
				0	0	0	0	0	0	0	0	#N/A
				0	0	0	0	0	0	0	0	#N/A
				0	0	0	0	0	0	0	0	#N/A
				0	0	0	0	0	0	0	0	#N/A
				0	0	0	0	0	0	0	0	#N/A
				0	0	0	0	0	0	0	0	#N/A
				0	0	0	0	0	0	0	0	#N/A
				0	0	0	0	0	0	0	0	#N/A
				0	0	0	0	0	0	0	0	#N/A
				0	0	0	0	0	0	0	0	#N/A
				0	0	0	0	0	0	0	0	#N/A
				0	0	0	0	0	0	0	0	#N/A
				0	0	0	0	0	0	0	0	#N/A
				0	0	0	0	0	0	0	0	#N/A
				0	0	0	0	0	0	0	0	#N/A
				0	0	0	0	0	0	0	0	#N/A
				0	0	0	0	0	0	0	0	#N/A
				0	0	0	0	0	0	0	0	#N/A
				0	0	0	0	0	0	0	0	#N/A
				0	0	0	0	0	0	0	0	#N/A
				0	0	0	0	0	0	0	0	#N/A
				0	0	0	0	0	0	0	0	#N/A
				0	0	0	0	0	0	0	0	#N/A
				0	0	0	0	0	0	0	0	#N/A
				0	0	0	0	0	0	0	0	#N/A
				0	0	0	0	0	0	0	0	#N/A
				0	0	0	0	0	0	0	0	#N/A
				0	0	0	0	0	0	0	0	#N/A
				0	0	0	0	0	0	0	0	#N/A
				0	0	0	0	0	0	0	0	#N/A
				0	0	0	0	0	0	0	0	#N/A
				0	0	0	0	0	0	0	0	#N/A
				0	0	0	0	0	0	0	0	#N/A
				0	0	0	0	0	0	0	0	#N/A
				0	0	0	0	0	0	0	0	#N/A
				0	0	0	0	0	0	0	0	#N/A
				0	0	0	0	0	0	0	0	#N/A
				0	0	0	0	0	0	0	0	#N/A
				0	0	0	0	0	0	0	0	#N/A
				0	0	0	0	0	0	0	0	#N/A
				0	0	0	0	0	0	0	0	#N/A
				0	0	0	0	0	0	0	0	#N/A
				0	0	0	0	0	0	0	0	#N/A
				0	0	0	0	0	0	0	0	#N/A
				0	0	0	0	0	0	0	0	#N/A
				0	0	0	0	0	0	0	0	#N/A
				0	0	0	0	0	0	0	0	#N/A
				0	0	0	0	0	0	0	0	#N/A
				0	0	0	0	0	0	0	0	#N/A
				0	0	0	0	0	0	0	0	#N/A
				0	0	0	0	0	0	0	0	#N/A
				0	0	0	0	0	0	0	0	#N/A
				0	0	0	0	0	0	0	0	#N/A
				0	0	0	0	0	0	0	0	#N/A
				0	0	0	0	0	0	0	0	#N/A
				0	0	0	0	0	0	0	0	#N/A
				0	0	0	0	0	0	0	0	#N/A
				0	0	0	0	0	0	0	0	#N/A
				0	0	0	0	0	0	0	0	#N/A
				0	0	0	0	0	0	0	0	#N/A
				0	0	0	0	0	0	0	0	#N/A
				0	0	0	0	0	0	0	0	#N/A
				0	0	0	0	0	0	0	0	#N/A
				0	0	0	0	0	0	0	0	#N/A
				0	0	0	0	0	0	0	0	#N/A
				0	0	0	0	0	0	0	0	#N/A
				0	0	0	0	0	0	0	0	#N/A
				0	0	0	0	0	0	0	0	#N/A
				0	0	0	0	0	0	0	0	#N/A
				0	0	0	0	0	0	0	0	#N/A
				0	0	0	0	0	0	0	0	#N/A
				0	0	0	0	0	0	0	0	#N/A
				0	0	0	0	0	0	0	0	#N/A
				0	0	0	0	0	0	0	0	#N/A
				0	0	0	0	0	0	0	0	#N/A
				0	0	0	0	0	0	0	0	#N/A
				0	0	0	0	0	0	0	0	#N/A
				0	0	0	0	0	0	0	0	#N/A
				0	0	0	0	0	0	0	0	#N/A
				0	0	0	0	0	0	0	0	#N/A
				0	0	0	0	0	0	0	0	#N/A
				0	0	0	0	0	0	0	0	#N/A
				0	0	0	0	0	0	0	0	#N/A
				0	0	0	0	0	0	0	0	#N/A
				0	0	0	0	0	0	0	0	#N/A
				0	0	0	0	0	0	0	0	#N/A
				0	0	0	0	0	0	0	0	#N/A
				0	0	0	0	0	0	0	0	#N/A
				0	0	0	0	0	0	0	0	#N/A
				0	0	0	0	0	0	0	0	#N/A
				0	0	0	0	0	0	0	0	#N/A
				0	0	0	0	0	0	0	0	#N/A
				0	0	0	0	0	0	0	0	#N/A
				0	0	0	0	0	0	0	0	#N/A
				0	0	0	0	0	0	0	0	#N/A
				0	0	0	0	0	0	0	0	#N/A
				0	0	0	0	0	0	0	0	#N/A
				0	0	0	0	0	0	0	0	#N/A
				0	0	0	0	0	0	0	0	#N/A
				0	0	0	0	0	0	0	0	#N/A
				0	0	0	0	0	0	0	0	#N/A
				0	0	0	0	0	0	0	0	#N/A
				0	0	0	0	0	0	0	0	#N/A
				0	0	0	0	0	0	0	0	#N/A
				0	0	0	0	0	0	0	0	#N/A
				0	0	0	0	0	0	0	0	#N/A
				0	0	0	0	0	0	0	0	#N/A
				0	0	0	0	0	0	0	0	#N/A
				0	0	0	0	0	0	0	0	#N/A
				0	0	0	0	0	0	0	0	#N/A
				0	0	0	0	0	0	0	0	#N/A
				0	0	0	0	0	0	0	0	#N/A
				0	0	0	0	0	0	0	0	#N/A
				0	0	0	0	0	0	0	0	#N/A
				0	0	0	0	0	0	0	0	#N/A
				0	0	0	0	0	0	0	0	#N/A
				0	0	0	0	0	0	0	0	#N/A
				0	0	0	0	0	0	0	0	#N/A
				0	0	0	0	0	0	0	0	#N/A
				0	0	0	0	0	0	0	0	#N/A
				0	0	0	0	0	0	0	0	#N/A
				0	0	0	0	0	0	0	0	#N/A
				0	0	0	0	0	0	0	0	#N/A
				0	0	0	0	0	0	0	0	#N/A
				0	0	0	0	0	0	0	0	#N/A
				0	0	0	0	0	0	0	0	#N/A
				0	0	0	0	0	0	0	0	#N/A
				0	0	0	0	0	0	0	0	#N/A
				0	0	0	0	0	0	0	0	#N/A
				0	0	0	0	0	0	0	0	#N/A
				0	0	0	0	0	0	0	0	#N/A
				0	0	0	0	0	0	0	0	#N/A
				0	0	0	0	0	0	0	0	#N/A
				0	0	0	0	0	0	0	0	#N/A
				0	0	0	0	0	0	0	0	#N/A
				0	0	0	0	0	0	0	0	#N/A
				0	0	0	0	0	0	0	0	#N/A
				0	0	0	0	0	0	0	0	#N/A
				0	0	0	0	0	0	0	0	#N/A
				0	0	0	0	0	0	0	0	#N/A
				0	0	0	0	0	0	0	0	#N/A
				0	0	0	0	0	0	0	0	#N/A
				0	0	0	0	0	0	0	0	#N/A
				0	0	0	0	0	0	0	0	#N/A
				0	0	0	0	0	0	0	0	#N/A
				0	0	0	0	0	0	0	0	#N/A
				0	0	0	0	0	0	0	0	#N/A
				0	0	0	0	0	0	0	0	#N/A
				0	0	0	0	0	0	0	0	#N/A
				0	0	0	0	0	0	0	0	#N/A
				0	0	0	0	0	0	0	0	#N/A
				0	0	0	0	0	0	0	0	#N/A
				0	0	0	0	0	0	0	0	#N/A
				0	0	0	0	0	0	0	0	#N/A
				0	0	0	0	0	0	0	0	#N/A
				0	0	0	0	0	0	0	0	#N/A
				0	0	0	0	0	0	0	0	#N/A
				0	0	0	0	0	0	0	0	#N/A
				0	0	0	0	0	0	0	0	#N/A
				0	0	0	0	0	0	0	0	#N/A
				0	0	0	0	0	0	0	0	#N/A
				0	0	0	0	0	0	0	0	#N/A
				0	0	0	0	0	0	0	0	#N/A
				0	0	0	0	0	0	0	0	#N/A
				0	0	0	0	0	0	0	0	#N/A
				0	0	0	0	0	0	0	0	#N/A
				0	0	0	0	0	0	0	0	#N/A
				0	0	0	0	0	0	0	0	#N/A
				0	0	0	0	0	0	0	0	#N/A
				0	0	0	0	0	0	0	0	#N/A
				0	0	0	0	0	0	0	0	#N/A
				0	0	0	0	0	0	0	0	#N/A
				0	0	0	0	0	0	0	0	#N/A
				0	0	0	0	0	0	0	0	#N/A
				0	0	0	0	0	0	0	0	#N/A
				0	0	0	0	0	0	0	0	#N/A
				0	0	0	0	0	0	0	0	#N/A
				0	0	0	0	0	0	0	0	#N/A
				0	0	0	0	0	0	0	0	#N/A
				0	0	0	0	0	0	0	0	#N/A
				0	0	0	0	0	0	0	0	#N/A
				0	0	0	0	0	0	0	0	#N/A
				0	0	0	0	0	0	0	0	#N/A
				0	0	0	0	0	0	0	0	#N/A
				0	0	0	0	0	0	0	0	#N/A
				0	0	0	0	0	0	0	0	#N/A
				0	0	0	0	0	0	0	0	#N/A
				0	0	0	0	0	0	0	0	#N/A
				0	0	0	0	0	0	0	0	#N/A
				0	0	0	0	0	0	0	0	#N/A
				0	0	0	0	0	0	0	0	#N/A
				0	0	0	0	0	0	0	0	#N/A
				0	0	0	0	0	0	0	0	#N/A
				0	0	0	0	0	0	0	0	#N/A
				0	0	0	0	0	0	0	0	#N/A
				0	0	0	0	0	0	0	0	#N/A
				0	0	0	0	0	0	0	0	#N/A
				0	0	0	0	0	0	0	0	#N/A
				0	0	0	0	0	0	0	0	#N/A
				0	0	0	0	0	0	0	0	#N/A
				0	0	0	0	0	0	0	0	#N/A
				0	0	0	0	0	0	0	0	#N/A
				0	0	0	0	0	0	0	0	#N/A
				0	0	0	0	0	0	0	0	#N/A
				0	0	0	0	0	0	0	0	#N/A
				0	0	0	0	0	0	0	0	#N/A
				0	0	0	0	0	0	0	0	#N/A
				0	0	0	0	0	0	0	0	#N/A
				0	0	0	0	0	0	0	0	#N/A
				0	0	0	0	0	0	0	0	#N/A
				0	0	0	0	0	0	0	0	#N/A
				0	0	0	0	0	0	0	0	#N/A
				0	0	0	0	0	0	0	0	#N/A
				0	0	0	0	0	0	0	0	#N/A
				0	0	0	0	0	0	0	0	#N/A
				0	0	0	0	0	0	0	0	#N/A
				0	0	0	0	0	0	0	0	#N/A
				0	0	0	0	0	0	0	0	#N/A
				0	0	0	0	0	0	0	0	#N/A
				0	0	0	0	0	0	0	0	#N/A
				0	0	0	0	0	0	0	0	#N/A
				0	0	0	0	0	0	0	0	#N/A
				0	0	0	0	0	0	0	0	#N/A
				0	0	0	0	0	0	0	0	#N/A
				0	0	0	0	0	0	0	0	#N/A
				0	0	0	0	0	0	0	0	#N/A
				0	0	0	0	0	0	0	0	#N/A
				0	0	0	0	0	0	0	0	#N/A
				0	0	0	0	0	0	0	0	#N/A
				0	0	0	0	0	0	0	0	#N/A
				0	0	0	0	0	0	0	0	#N/A
				0	0	0	0	0	0	0	0	#N/A
				0	0	0	0	0	0	0	0	#N/A
				0	0	0	0	0	0	0	0	#N/A
				0	0	0	0	0	0	0	0	#N/A
				0	0	0	0	0	0	0	0	#N/A
				0	0	0	0	0	0	0	0	#N/A
				0	0	0	0	0	0	0	0	#N/A
				0	0	0	0	0	0	0	0	#N/A
				0	0	0	0	0	0	0	0	#N/A
				0	0	0	0	0	0	0	0	#N/A
				0	0	0	0	0	0	0	0	#N/A
				0	0	0	0	0	0	0	0	#N/A
				0	0	0	0	0	0	0	0	#N/A
				0	0	0	0	0	0	0	0	#N/A
				0	0	0	0	0	0	0	0	#N/A
				0	0	0	0	0	0	0	0	#N/A
				0	0	0	0	0	0	0	0	#N/A
				0	0	0	0	0	0	0	0	#N/A
				0	0	0	0	0	0	0	0	#N/A
				0	0	0	0	0	0	0	0	#N/A
				0	0	0	0	0	0	0	0	#N/A
				0	0	0	0	0	0	0	0	#N/A
				0	0	0	0	0	0	0	0	#N/A
				0	0	0	0	0	0	0	0	#N/A
				0	0	0	0	0	0	0	0	#N/A
				0	0	0	0	0	0	0	0	#N/A
				0	0	0	0	0	0	0	0	#N/A
				0	0	0	0	0	0	0	0	#N/A
				0	0	0	0	0	0	0	0	#N/A
				0	0	0	0	0	0	0	0	#N/A
				0	0	0	0	0	0	0	0	#N/A
				0	0	0	0	0	0	0	0	#N/A
				0	0	0	0	0	0	0	0	#N/A
				0	0	0	0	0	0	0	0	#N/A
				0	0	0	0	0	0	0	0	#N/A
				0	0	0	0	0	0	0	0	#N/A
				0	0	0	0	0	0	0	0	#N/A
				0	0	0	0	0	0	0	0	#N/A
				0	0	0	0	0	0	0	0	#N/A
				0	0	0	0	0	0	0	0	#N/A
				0	0	0	0	0	0	0	0	#N/A
				0	0	0	0	0	0	0	0	#N/A
				0	0	0	0	0	0	0	0	#N/A
				0	0	0	0	0	0	0	0	#N/A
				0	0	0	0	0	0	0	0	#N/A
				0	0	0	0	0	0	0	0	#N/A
				0	0	0	0	0	0	0	0	#N/A
				0	0	0	0	0	0	0	0	#N/A
				0	0	0	0	0	0	0	0	#N/A
				0	0	0	0	0	0	0	0	#N/A
				0	0	0	0	0	0	0	0	#N/A
				0	0	0	0	0	0	0	0	#N/A
				0	0	0	0	0	0	0	0	#N/A
				0	0	0	0	0	0	0	0	#N/A
				0	0	0	0	0	0	0	0	#N/A
				0	0	0	0	0	0	0	0	#N/A
				0	0	0	0	0	0	0	0	#N/A
				0	0	0	0	0	0	0	0	#N/A
				0	0	0	0	0	0	0	0	#N/A
				0	0	0	0	0	0	0	0	#N/A
				0	0	0	0	0	0	0	0	#N/A
				0	0	0	0	0	0	0	0	#N/A
				0	0	0	0	0	0	0	0	#N/A
				0	0	0	0	0	0	0	0	#N/A
				0	0	0	0	0	0	0	0	#N/A
				0	0	0	0	0	0	0	0	#N/A
				0	0	0	0	0	0	0	0	#N/A
				0	0	0	0	0	0	0	0	#N/A
				0	0	0	0	0	0	0	0	#N/A
				0	0	0	0	0	0	0	0	#N/A
				0	0	0	0	0	0	0	0	#N/A
				0	0	0	0	0	0	0	0	#N/A
				0	0	0	0	0	0	0	0	#N/A
				0	0	0	0	0	0	0	0	#N/A
				0	0	0	0	0	0	0	0	#N/A
				0	0	0	0	0	0	0	0	#N/A
				0	0	0	0	0	0	0	0	#N/A
				0	0	0	0	0	0	0	0	#N/A
				0	0	0	0	0	0	0	0	#N/A
				0	0	0	0	0	0	0	0	#N/A
				0	0	0	0	0	0	0	0	#N/A
				0	0	0	0	0	0	0	0	#N/A
				0	0	0	0	0	0	0	0	#N/A
				0	0	0	0	0	0	0	0	#N/A
				0	0	0	0	0	0	0	0	#N/A
				0	0	0	0	0	0	0	0	#N/A
				0	0	0	0	0	0	0	0	#N/A
				0	0	0	0	0	0	0	0	#N/A
				0	0	0	0	0	0	0	0	#N/A
				0	0	0	0	0	0	0	0	#N/A
				0	0	0	0	0	0	0	0	#N/A
				0	0	0	0	0	0	0	0	#N/A
				0	0	0	0	0	0	0	0	#N/A
				0	0	0	0	0	0	0	0	#N/A
				0	0	0	0	0	0	0	0	#N/A
				0	0	0	0	0	0	0	0	#N/A
				0	0	0	0	0	0	0	0	#N/A
				0	0	0	0	0	0	0	0	#N/A
				0	0	0	0	0	0	0	0	#N/A
				0	0	0	0	0	0	0	0	#N/A
				0	0	0	0	0	0	0	0	#N/A
				0	0	0	0	0	0	0	0	#N/A
				0	0	0	0	0	0	0	0	#N/A
				0	0	0	0	0	0	0	0	#N/A
				0	0	0	0	0	0	0	0	#N/A
				0	0	0	0	0	0	0	0	#N/A
				0	0	0	0	0	0	0	0	#N/A
				0	0	0	0	0	0	0	0	#N/A
				0	0	0	0	0	0	0	0	#N/A
				0	0	0	0	0	0	0	0	#N/A
				0	0	0	0	0	0	0	0	#N/A
				0	0	0	0	0	0	0	0	#N/A
				0	0	0	0	0	0	0	0	#N/A
				0	0	0	0	0	0	0	0	#N/A
				0	0	0	0	0	0	0	0	#N/A
				0	0	0	0	0	0	0	0	#N/A
				0	0	0	0	0	0	0	0	#N/A
				0	0	0	0	0	0	0	0	#N/A
				0	0	0	0	0	0	0	0	#N/A
				0	0	0	0	0	0	0	0	#N/A
				0	0	0	0	0	0	0	0	#N/A
				0	0	0	0	0	0	0	0	#N/A
				0	0	0	0	0	0	0	0	#N/A
				0	0	0	0	0	0	0	0	#N/A
				0	0	0	0	0	0	0	0	#N/A
				0	0	0	0	0	0	0	0	#N/A
				0	0	0	0	0	0	0	0	#N/A
				0	0	0	0	0	0	0	0	#N/A
				0	0	0	0	0	0	0	0	#N/A
				0	0	0	0	0	0	0	0	#N/A
				0	0	0	0	0	0	0	0	#N/A
				0	0	0	0	0	0	0	0	#N/A
				0	0	0	0	0	0	0	0	#N/A
				0	0	0	0	0	0	0	0	#N/A
				0	0	0	0	0	0	0	0	#N/A
				0	0	0	0	0	0	0	0	#N/A
				0	0	0	0	0	0	0	0	#N/A
				0	0	0	0	0	0	0	0	#N/A
				0	0	0	0	0	0	0	0	#N/A
				0	0	0	0	0	0	0	0	#N/A
				0	0	0	0	0	0	0	0	#N/A
				0	0	0	0	0	0	0	0	#N/A
				0	0	0	0	0	0	0	0	#N/A
				0	0	0	0	0	0	0	0	#N/A
				0	0	0	0	0	0	0	0	#N/A
				0	0	0	0	0	0	0	0	#N/A
				0	0	0	0	0	0	0	0	#N/A
				0	0	0	0	0	0	0	0	#N/A
				0	0	0	0	0	0	0	0	#N/A
				0	0	0	0	0	0	0	0	#N/A
				0	0	0	0	0	0	0	0	#N/A
				0	0	0	0	0	0	0	0	#N/A
				0	0	0	0	0	0	0	0	#N/A
				0	0	0	0	0	0	0	0	#N/A
				0	0	0	0	0	0	0	0	#N/A
				0	0	0	0	0	0	0	0	#N/A
				0	0	0	0	0	0	0	0	#N/A
				0	0	0	0	0	0	0	0	#N/A
				0	0	0	0	0	0	0	0	#N/A
				0	0	0	0	0	0	0	0	#N/A
				0	0	0	0	0	0	0	0	#N/A
				0	0	0	0	0	0	0	0	#N/A
				0	0	0	0	0	0	0	0	#N/A
				0	0	0	0	0	0	0	0	#N/A
				0	0	0	0	0	0	0	0	#N/A
				0	0	0	0	0	0	0	0	#N/A
				0	0	0	0	0	0	0	0	#N/A
				0	0	0	0	0	0	0	0	#N/A
				0	0	0	0	0	0	0	0	#N/A
				0	0	0	0	0	0	0	0	#N/A
				0	0	0	0	0	0	0	0	#N/A
				0	0	0	0	0	0	0	0	#N/A
				0	0	0	0	0	0	0	0	#N/A
				0	0	0	0	0	0	0	0	#N/A
				0	0	0	0	0	0	0	0	#N/A
				0	0	0	0	0	0	0	0	#N/A
				0	0	0	0	0	0	0	0	#N/A
				0	0	0	0	0	0	0	0	#N/A
				0	0	0	0	0	0	0	0	#N/A
				0	0	0	0	0	0	0	0	#N/A
				0	0	0	0	0	0	0	0	#N/A
				0	0	0	0	0	0	0	0	#N/A
				0	0	0	0	0	0	0	0	#N/A
				0	0	0	0	0	0	0	0	#N/A
				0	0	0	0	0	0	0	0	#N/A
				0	0	0	0	0	0	0	0	#N/A
				0	0	0	0	0	0	0	0	#N/A
				0	0	0	0	0	0	0	0	#N/A
				0	0	0	0	0	0	0	0	#N/A
				0	0	0	0	0	0	0	0	#N/A
				0	0	0	0	0	0	0	0	#N/A
				0	0	0	0	0	0	0	0	#N/A
				0	0	0	0	0	0	0	0	#N/A
				0	0	0	0	0	0	0	0	#N/A
				0	0	0	0	0	0	0	0	#N/A
				0	0	0	0	0	0	0	0	#N/A
				0	0	0	0	0	0	0	0	#N/A
				0	0	0	0	0	0	0	0	#N/A
				0	0	0	0	0	0	0	0	#N/A
				0	0	0	0	0	0	0	0	#N/A
				0	0	0	0	0	0	0	0	#N/A
				0	0	0	0	0	0	0	0	#N/A
				0	0	0	0	0	0	0	0	#N/A
				0	0	0	0	0	0	0	0	#N/A
				0	0	0	0	0	0	0	0	#N/A
				0	0	0	0	0	0	0	0	#N/A
				0	0	0	0	0	0	0	0	#N/A
				0	0	0	0	0	0	0	0	#N/A
				0	0	0	0	0	0	0	0	#N/A
				0	0	0	0	0	0	0	0	#N/A
				0	0	0	0	0	0	0	0	#N/A
				0	0	0	0	0	0	0	0	#N/A
				0	0	0	0	0	0	0	0	#N/A
				0	0	0	0	0	0	0	0	#N/A
				0	0	0	0	0	0	0	0	#N/A
				0	0	0	0	0	0	0	0	#N/A
				0	0	0	0	0	0	0	0	#N/A
				0	0	0	0	0	0	0	0	#N/A
				0	0	0	0	0	0	0	0	#N/A
				0	0	0	0	0	0	0	0	#N/A
				0	0	0	0	0	0	0	0	#N/A
				0	0	0	0	0	0	0	0	#N/A
				0	0	0	0	0	0	0	0	#N/A
				0	0	0	0	0	0	0	0	#N/A
				0	0	0	0	0	0	0	0	#N/A
				0	0	0	0	0	0	0	0	#N/A
				0	0	0	0	0	0	0	0	#N/A
				0	0	0	0	0	0	0	0	#N/A
				0	0	0	0	0	0	0	0	#N/A
				0	0	0	0	0	0	0	0	#N/A
				0	0	0	0	0	0	0	0	#N/A
				0	0	0	0	0	0	0	0	#N/A
				0	0	0	0	0	0	0	0	#N/A
				0	0	0	0	0	0	0	0	#N/A
				0	0	0	0	0	0	0	0	#N/A
				0	0	0	0	0	0	0	0	#N/A
				0	0	0	0	0	0	0	0	#N/A
				0	0	0	0	0	0	0	0	#N/A
				0	0	0	0	0	0	0	0	#N/A
				0	0	0	0	0	0	0	0	#N/A
				0	0	0	0	0	0	0	0	#N/A
				0	0	0	0	0	0	0	0	#N/A
				0	0	0	0	0	0	0	0	#N/A
				0	0	0	0	0	0	0	0	#N/A
				0	0	0	0	0	0	0	0	#N/A
				0	0	0	0	0	0	0	0	#N/A
				0	0	0	0	0	0	0	0	#N/A
				0	0	0	0	0	0	0	0	#N/A
				0	0	0	0	0	0	0	0	#N/A
				0	0	0	0	0	0	0	0	#N/A
				0	0	0	0	0	0	0	0	#N/A
				0	0	0	0	0	0	0	0	#N/A
				0	0	0	0	0	0	0	0	#N/A
				0	0	0	0	0	0	0	0	#N/A
				0	0	0	0	0	0	0	0	#N/A
				0	0	0	0	0	0	0	0	#N/A
				0	0	0	0	0	0	0	0	#N/A
				0	0	0	0	0	0	0	0	#N/A
				0	0	0	0	0	0	0	0	#N/A
				0	0	0	0	0	0	0	0	#N/A
				0	0	0	0	0	0	0	0	#N/A
				0	0	0	0	0	0	0	0	#N/A
				0	0	0	0	0	0	0	0	#N/A
				0	0	0	0	0	0	0	0	#N/A
				0	0	0	0	0	0	0	0	#N/A
				0	0	0	0	0	0	0	0	#N/A
				0	0	0	0	0	0	0	0	#N/A
				0	0	0	0	0	0	0	0	#N/A
				0	0	0	0	0	0	0	0	#N/A
				0	0	0	0	0	0	0	0	#N/A
				0	0	0	0	0	0	0	0	#N/A
				0	0	0	0	0	0	0	0	#N/A
				0	0	0	0	0	0	0	0	#N/A
				0	0	0	0	0	0	0	0	#N/A
				0	0	0	0	0	0	0	0	#N/A
				0	0	0	0	0	0	0	0	#N/A
				0	0	0	0	0	0	0	0	#N/A
				0	0	0	0	0	0	0	0	#N/A
				0	0	0	0	0	0	0	0	#N/A
				0	0	0	0	0	0	0	0	#N/A
				0	0	0	0	0	0	0	0	#N/A
				0	0	0	0	0	0	0	0	#N/A
				0	0	0	0	0	0	0	0	#N/A
				0	0	0	0	0	0	0	0	#N/A
				0	0	0	0	0	0	0	0	#N/A
				0	0	0	0	0	0	0	0	#N/A
				0	0	0	0	0	0	0	0	#N/A
				0	0	0	0	0	0	0	0	#N/A
				0	0	0	0	0	0	0	0	#N/A
				0	0	0	0	0	0	0	0	#N/A
				0	0	0	0	0	0	0	0	#N/A
				0	0	0	0	0	0	0	0	#N/A
				0	0	0	0	0	0	0	0	#N/A
				0	0	0	0	0	0	0	0	#N/A
				0	0	0	0	0	0	0	0	#N/A
				0	0	0	0	0	0	0	0	#N/A
				0	0	0	0	0	0	0	0	#N/A
				0	0	0	0	0	0	0	0	#N/A
				0	0	0	0	0	0	0	0	#N/A
				0	0	0	0	0	0	0	0	#N/A
				0	0	0	0	0	0	0	0	#N/A
				0	0	0	0	0	0	0	0	#N/A
				0	0	0	0	0	0	0	0	#N/A
				0	0	0	0	0	0	0	0	#N/A
				0	0	0	0	0	0	0	0	#N/A
				0	0	0	0	0	0	0	0	#N/A
				0	0	0	0	0	0	0	0	#N/A
				0	0	0	0	0	0	0	0	#N/A
				0	0	0	0	0	0	0	0	#N/A
				0	0	0	0	0	0	0	0	#N/A
				0	0	0	0	0	0	0	0	#N/A
				0	0	0	0	0	0	0	0	#N/A
				0	0	0	0	0	0	0	0	#N/A
				0	0	0	0	0	0	0	0	#N/A
				0	0	0	0	0	0	0	0	#N/A
				0	0	0	0	0	0	0	0	#N/A
				0	0	0	0	0	0	0	0	#N/A
				0	0	0	0	0	0	0	0	#N/A
				0	0	0	0	0	0	0	0	#N/A
				0	0	0	0	0	0	0	0	#N/A
				0	0	0	0	0	0	0	0	#N/A
				0	0	0	0	0	0	0	0	#N/A
				0	0	0	0	0	0	0	0	#N/A
				0	0	0	0	0	0	0	0	#N/A
				0	0	0	0	0	0	0	0	#N/A
				0	0	0	0	0	0	0	0	#N/A
				0	0	0	0	0	0	0	0	#N/A
				0	0	0	0	0	0	0	0	#N/A
				0	0	0	0	0	0	0	0	#N/A
				0	0	0	0	0	0	0	0	#N/A
				0	0	0	0	0	0	0	0	#N/A
				0	0	0	0	0	0	0	0	#N/A
				0	0	0	0	0	0	0	0	#N/A
				0	0	0	0	0	0	0	0	#N/A
				0	0	0	0	0	0	0	0	#N/A
				0	0	0	0	0	0	0	0	#N/A
				0	0	0	0	0	0	0	0	#N/A
				0	0	0	0	0	0	0	0	#N/A
				0	0	0	0	0	0	0	0	#N/A
				0	0	0	0	0	0	0	0	#N/A
				0	0	0	0	0	0	0	0	#N/A
				0	0	0	0	0	0	0	0	#N/A
				0	0	0	0	0	0	0	0	#N/A
				0	0	0	0	0	0	0	0	#N/A
				0	0	0	0	0	0	0	0	#N/A
				0	0	0	0	0	0	0	0	#N/A
				0	0	0	0	0	0	0	0	#N/A
				0	0	0	0	0	0	0	0	#N/A
				0	0	0	0	0	0	0	0	#N/A
				0	0	0	0	0	0	0	0	#N/A
				0	0	0	0	0	0	0	0	#N/A
				0	0	0	0	0	0	0	0	#N/A
				0	0	0	0	0	0	0	0	#N/A
				0	0	0	0	0	0	0	0	#N/A
				0	0	0	0	0	0	0	0	#N/A
				0	0	0	0	0	0	0	0	#N/A
				0	0	0	0	0	0	0	0	#N/A
				0	0	0	0	0	0	0	0	#N/A
				0	0	0	0	0	0	0	0	#N/A
				0	0	0	0	0	0	0	0	#N/A
				0	0	0	0	0	0	0	0	#N/A
				0	0	0	0	0	0	0	0	#N/A
				0	0	0	0	0	0	0	0	#N/A
				0	0	0	0	0	0	0	0	#N/A
				0	0	0	0	0	0	0	0	#N/A
				0	0	0	0	0	0	0	0	#N/A
				0	0	0	0	0	0	0	0	#N/A
				0	0	0	0	0	0	0	0	#N/A
				0	0	0	0	0	0	0	0	#N/A
				0	0	0	0	0	0	0	0	#N/A
				0	0	0	0	0	0	0	0	#N/A
				0	0	0	0	0	0	0	0	#N/A
				0	0	0	0	0	0	0	0	#N/A
				0	0	0	0	0	0	0	0	#N/A
				0	0	0	0	0	0	0	0	#N/A
				0	0	0	0	0	0	0	0	#N/A
				0	0	0	0	0	0	0	0	#N/A
				0	0	0	0	0	0	0	0	#N/A
				0	0	0	0	0	0	0	0	#N/A
				0	0	0	0	0	0	0	0	#N/A
				0	0	0	0	0	0	0	0	#N/A
				0	0	0	0	0	0	0	0	#N/A
				0	0	0	0	0	0	0	0	#N/A
				0	0	0	0	0	0	0	0	#N/A
				0	0	0	0	0	0	0	0	#N/A
				0	0	0	0	0	0	0	0	#N/A
				0	0	0	0	0	0	0	0	#N/A
				0	0	0	0	0	0	0	0	#N/A
				0	0	0	0	0	0	0	0	#N/A
				0	0	0	0	0	0	0	0	#N/A
				0	0	0	0	0	0	0	0	#N/A
				0	0	0	0	0	0	0	0	#N/A
				0	0	0	0	0	0	0	0	#N/A
				0	0	0	0	0	0	0	0	#N/A
				0	0	0	0	0	0	0	0	#N/A
				0	0	0	0	0	0	0	0	#N/A
				0	0	0	0	0	0	0	0	#N/A
				0	0	0	0	0	0	0	0	#N/A
				0	0	0	0	0	0	0	0	#N/A
				0	0	0	0	0	0	0	0	#N/A
				0	0	0	0	0	0	0	0	#N/A
				0	0	0	0	0	0	0	0	#N/A
				0	0	0	0	0	0	0	0	#N/A
				0	0	0	0	0	0	0	0	#N/A
				0	0	0	0	0	0	0	0	#N/A
				0	0	0	0	0	0	0	0	#N/A
				0	0	0	0	0	0	0	0	#N/A
				0	0	0	0	0	0	0	0	#N/A
				0	0	0	0	0	0	0	0	#N/A
				0	0	0	0	0	0	0	0	#N/A
				0	0	0	0	0	0	0	0	#N/A
				0	0	0	0	0	0	0	0	#N/A
				0	0	0	0	0	0	0	0	#N/A
				0	0	0	0	0	0	0	0	#N/A
				0	0	0	0	0	0	0	0	#N/A
				0	0	0	0	0	0	0	0	#N/A
				0	0	0	0	0	0	0	0	#N/A
				0	0	0	0	0	0	0	0	#N/A
				0	0	0	0	0	0	0	0	#N/A
				0	0	0	0	0	0	0	0	#N/A
				0	0	0	0	0	0	0	0	#N/A
				0	0	0	0	0	0	0	0	#N/A
				0	0	0	0	0	0	0	0	#N/A
				0	0	0	0	0	0	0	0	#N/A
				0	0	0	0	0	0	0	0	#N/A
				0	0	0	0	0	0	0	0	#N/A
				0	0	0	0	0	0	0	0	#N/A
				0	0	0	0	0	0	0	0	#N/A
				0	0	0	0	0	0	0	0	#N/A
				0	0	0	0	0	0	0	0	#N/A
				0	0	0	0	0	0	0	0	#N/A
				0	0	0	0	0	0	0	0	#N/A
				0	0	0	0	0	0	0	0	#N/A
				0	0	0	0	0	0	0	0	#N/A
				0	0	0	0	0	0	0	0	#N/A
				0	0	0	0	0	0	0	0	#N/A
				0	0	0	0	0	0	0	0	#N/A
				0	0	0	0	0	0	0	0	#N/A
				0	0	0	0	0	0	0	0	#N/A
				0	0	0	0	0	0	0	0	#N/A
				0	0	0	0	0	0	0	0	#N/A
				0	0	0	0	0	0	0	0	#N/A
				0	0	0	0	0	0	0	0	#N/A
				0	0	0	0	0	0	0	0	#N/A
				0	0	0	0	0	0	0	0	#N/A
				0	0	0	0	0	0	0	0	#N/A
				0	0	0	0	0	0	0	0	#N/A
				0	0	0	0	0	0	0	0	#N/A
				0	0	0	0	0	0	0	0	#N/A
				0	0	0	0	0	0	0	0	#N/A
				0	0	0	0	0	0	0	0	#N/A
				0	0	0	0	0	0	0	0	#N/A
				0	0	0	0	0	0	0	0	#N/A
				0	0	0	0	0	0	0	0	#N/A
				0	0	0	0	0	0	0	0	#N/A
				0	0	0	0	0	0	0	0	#N/A
				0	0	0	0	0	0	0	0	#N/A
				0	0	0	0	0	0	0	0	#N/A
				0	0	0	0	0	0	0	0	#N/A
				0	0	0	0	0	0	0	0	#N/A
				0	0	0	0	0	0	0	0	#N/A
				0	0	0	0	0	0	0	0	#N/A
				0	0	0	0	0	0	0	0	#N/A
				0	0	0	0	0	0	0	0	#N/A
				0	0	0	0	0	0	0	0	#N/A
				0	0	0	0	0	0	0	0	#N/A
				0	0	0	0	0	0	0	0	#N/A
				0	0	0	0	0	0	0	0	#N/A
				0	0	0	0	0	0	0	0	#N/A
				0	0	0	0	0	0	0	0	#N/A
				0	0	0	0	0	0	0	0	#N/A
				0	0	0	0	0	0	0	0	#N/A
				0	0	0	0	0	0	0	0	#N/A
				0	0	0	0	0	0	0	0	#N/A
				0	0	0	0	0	0	0	0	#N/A
				0	0	0	0	0	0	0	0	#N/A
				0	0	0	0	0	0	0	0	#N/A
				0	0	0	0	0	0	0	0	#N/A
				0	0	0	0	0	0	0	0	#N/A
				0	0	0	0	0	0	0	0	#N/A
				0	0	0	0	0	0	0	0	#N/A
				0	0	0	0	0	0	0	0	#N/A
				0	0	0	0	0	0	0	0	#N/A
				0	0	0	0	0	0	0	0	#N/A
				0	0	0	0	0	0	0	0	#N/A
				0	0	0	0	0	0	0	0	#N/A
				0	0	0	0	0	0	0	0	#N/A
				0	0	0	0	0	0	0	0	#N/A
				0	0	0	0	0	0	0	0	#N/A
				0	0	0	0	0	0	0	0	#N/A
				0	0	0	0	0	0	0	0	#N/A
				0	0	0	0	0	0	0	0	#N/A
				0	0	0	0	0	0	0	0	#N/A
				0	0	0	0	0	0	0	0	#N/A
				0	0	0	0	0	0	0	0	#N/A
				0	0	0	0	0	0	0	0	#N/A
				0	0	0	0	0	0	0	0	#N/A
				0	0	0	0	0	0	0	0	#N/A
				0	0	0	0	0	0	0	0	#N/A
				0	0	0	0	0	0	0	0	#N/A
				0	0	0	0	0	0	0	0	#N/A
				0	0	0	0	0	0	0	0	#N/A
				0	0	0	0	0	0	0	0	#N/A
				0	0	0	0	0	0	0	0	#N/A
				0	0	0	0	0	0	0	0	#N/A
				0	0	0	0	0	0	0	0	#N/A
				0	0	0	0	0	0	0	0	#N/A
				0	0	0	0	0	0	0	0	#N/A
				0	0	0	0	0	0	0	0	#N/A
				0	0	0	0	0	0	0	0	#N/A
				0	0	0	0	0	0	0	0	#N/A
				0	0	0	0	0	0	0	0	#N/A
				0	0	0	0	0	0	0	0	#N/A
				0	0	0	0	0	0	0	0	#N/A
				0	0	0	0	0	0	0	0	#N/A
				0	0	0	0	0	0	0	0	#N/A
				0	0	0	0	0	0	0	0	#N/A
				0	0	0	0	0	0	0	0	#N/A
				0	0	0	0	0	0	0	0	#N/A
				0	0	0	0	0	0	0	0	#N/A
				0	0	0	0	0	0	0	0	#N/A
				0	0	0	0	0	0	0	0	#N/A
				0	0	0	0	0	0	0	0	#N/A
				0	0	0	0	0	0	0	0	#N/A
				0	0	0	0	0	0	0	0	#N/A
				0	0	0	0	0	0	0	0	#N/A
				0	0	0	0	0	0	0	0	#N/A
				0	0	0	0	0	0	0	0	#N/A
				0	0	0	0	0	0	0	0	#N/A
				0	0	0	0	0	0	0	0	#N/A
				0	0	0	0	0	0	0	0	#N/A
				0	0	0	0	0	0	0	0	#N/A
				0	0	0	0	0	0	0	0	#N/A
				0	0	0	0	0	0	0	0	#N/A
				0	0	0	0	0	0	0	0	#N/A
				0	0	0	0	0	0	0	0	#N/A
				0	0	0	0	0	0	0	0	#N/A
				0	0	0	0	0	0	0	0	#N/A
				0	0	0	0	0	0	0	0	#N/A
				0	0	0	0	0	0	0	0	#N/A
				0	0	0	0	0	0	0	0	#N/A
				0	0	0	0	0	0	0	0	#N/A
				0	0	0	0	0	0	0	0	#N/A
				0	0	0	0	0	0	0	0	#N/A
				0	0	0	0	0	0	0	0	#N/A
				0	0	0	0	0	0	0	0	#N/A
				0	0	0	0	0	0	0	0	#N/A
				0	0	0	0	0	0	0	0	#N/A
				0	0	0	0	0	0	0	0	#N/A
				0	0	0	0	0	0	0	0	#N/A
				0	0	0	0	0	0	0	0	#N/A
				0	0	0	0	0	0	0	0	#N/A
				0	0	0	0	0	0	0	0	#N/A
				0	0	0	0	0	0	0	0	#N/A
				0	0	0	0	0	0	0	0	#N/A
				0	0	0	0	0	0	0	0	#N/A
				0	0	0	0	0	0	0	0	#N/A
				0	0	0	0	0	0	0	0	#N/A
				0	0	0	0	0	0	0	0	#N/A
				0	0	0	0	0	0	0	0	#N/A
				0	0	0	0	0	0	0	0	#N/A
				0	0	0	0	0	0	0	0	#N/A
				0	0	0	0	0	0	0	0	#N/A
				0	0	0	0	0	0	0	0	#N/A
				0	0	0	0	0	0	0	0	#N/A
				0	0	0	0	0	0	0	0	#N/A
				0	0	0	0	0	0	0	0	#N/A
				0	0	0	0	0	0	0	0	#N/A
				0	0	0	0	0	0	0	0	#N/A
				0	0	0	0	0	0	0	0	#N/A
				0	0	0	0	0	0	0	0	#N/A
				0	0	0	0	0	0	0	0	#N/A
				0	0	0	0	0	0	0	0	#N/A
				0	0	0	0	0	0	0	0	#N/A
				0	0	0	0	0	0	0	0	#N/A
				0	0	0	0	0	0	0	0	#N/A
				0	0	0	0	0	0	0	0	#N/A
				0	0	0	0	0	0	0	0	#N/A
				0	0	0	0	0	0	0	0	#N/A
				0	0	0	0	0	0	0	0	#N/A
				0	0	0	0	0	0	0	0	#N/A
				0	0	0	0	0	0	0	0	#N/A
				0	0	0	0	0	0	0	0	#N/A
				0	0	0	0	0	0	0	0	#N/A
				0	0	0	0	0	0	0	0	#N/A
				0	0	0	0	0	0	0	0	#N/A
				0	0	0	0	0	0	0	0	#N/A
				0	0	0	0	0	0	0	0	#N/A
				0	0	0	0	0	0	0	0	#N/A
				0	0	0	0	0	0	0	0	#N/A
				0	0	0	0	0	0	0	0	#N/A
				0	0	0	0	0	0	0	0	#N/A
				0	0	0	0	0	0	0	0	#N/A
				0	0	0	0	0	0	0	0	#N/A
				0	0	0	0	0	0	0	0	#N/A
				0	0	0	0	0	0	0	0	#N/A
				0	0	0	0	0	0	0	0	#N/A
				0	0	0	0	0	0	0	0	#N/A
				0	0	0	0	0	0	0	0	#N/A
				0	0	0	0	0	0	0	0	#N/A
				0	0	0	0	0	0	0	0	#N/A
				0	0	0	0	0	0	0	0	#N/A
				0	0	0	0	0	0	0	0	#N/A
				0	0	0	0	0	0	0	0	#N/A
				0	0	0	0	0	0	0	0	#N/A
				0	0	0	0	0	0	0	0	#N/A
				0	0	0	0	0	0	0	0	#N/A
				0	0	0	0	0	0	0	0	#N/A
				0	0	0	0	0	0	0	0	#N/A
				0	0	0	0	0	0	0	0	#N/A
				0	0	0	0	0	0	0	0	#N/A
				0	0	0	0	0	0	0	0	#N/A
				0	0	0	0	0	0	0	0	#N/A
				0	0	0	0	0	0	0	0	#N/A
				0	0	0	0	0	0	0	0	#N/A
				0	0	0	0	0	0	0	0	#N/A
				0	0	0	0	0	0	0	0	#N/A
				0	0	0	0	0	0	0	0	#N/A
				0	0	0	0	0	0	0	0	#N/A
				0	0	0	0	0	0	0	0	#N/A
				0	0	0	0	0	0	0	0	#N/A
				0	0	0	0	0	0	0	0	#N/A
				0	0	0	0	0	0	0	0	#N/A
				0	0	0	0	0	0	0	0	#N/A
				0	0	0	0	0	0	0	0	#N/A
				0	0	0	0	0	0	0	0	#N/A
				0	0	0	0	0	0	0	0	#N/A
				0	0	0	0	0	0	0	0	#N/A
				0	0	0	0	0	0	0	0	#N/A
				0	0	0	0	0	0	0	0	#N/A
				0	0	0	0	0	0	0	0	#N/A
				0	0	0	0	0	0	0	0	#N/A
				0	0	0	0	0	0	0	0	#N/A
				0	0	0	0	0	0	0	0	#N/A
				0	0	0	0	0	0	0	0	#N/A
				0	0	0	0	0	0	0	0	#N/A
				0	0	0	0	0	0	0	0	#N/A
				0	0	0	0	0	0	0	0	#N/A
				0	0	0	0	0	0	0	0	#N/A
				0	0	0	0	0	0	0	0	#N/A
				0	0	0	0	0	0	0	0	#N/A
				0	0	0	0	0	0	0	0	#N/A
				0	0	0	0	0	0	0	0	#N/A
				0	0	0	0	0	0	0	0	#N/A
				0	0	0	0	0	0	0	0	#N/A
				0	0	0	0	0	0	0	0	#N/A
				0	0	0	0	0	0	0	0	#N/A
				0	0	0	0	0	0	0	0	#N/A
				0	0	0	0	0	0	0	0	#N/A
				0	0	0	0	0	0	0	0	#N/A
				0	0	0	0	0	0	0	0	#N/A
				0	0	0	0	0	0	0	0	#N/A
				0	0	0	0	0	0	0	0	#N/A
				0	0	0	0	0	0	0	0	#N/A
				0	0	0	0	0	0	0	0	#N/A
				0	0	0	0	0	0	0	0	#N/A
				0	0	0	0	0	0	0	0	#N/A
				0	0	0	0	0	0	0	0	#N/A
				0	0	0	0	0	0	0	0	#N/A
				0	0	0	0	0	0	0	0	#N/A
				0	0	0	0	0	0	0	0	#N/A
				0	0	0	0	0	0	0	0	#N/A
				0	0	0	0	0	0	0	0	#N/A
				0	0	0	0	0	0	0	0	#N/A
				0	0	0	0	0	0	0	0	#N/A
				0	0	0	0	0	0	0	0	#N/A
				0	0	0	0	0	0	0	0	#N/A
				0	0	0	0	0	0	0	0	#N/A
				0	0	0	0	0	0	0	0	#N/A
				0	0	0	0	0	0	0	0	#N/A
				0	0	0	0	0	0	0	0	#N/A
				0	0	0	0	0	0	0	0	#N/A
				0	0	0	0	0	0	0	0	#N/A
				0	0	0	0	0	0	0	0	#N/A
				0	0	0	0	0	0	0	0	#N/A
				0	0	0	0	0	0	0	0	#N/A
				0	0	0	0	0	0	0	0	#N/A
				0	0	0	0	0	0	0	0	#N/A
				0	0	0	0	0	0	0	0	#N/A
				0	0	0	0	0	0	0	0	#N/A
				0	0	0	0	0	0	0	0	#N/A
				0	0	0	0	0	0	0	0	#N/A
				0	0	0	0	0	0	0	0	#N/A
				0	0	0	0	0	0	0	0	#N/A
				0	0	0	0	0	0	0	0	#N/A
				0	0	0	0	0	0	0	0	#N/A
				0	0	0	0	0	0	0	0	#N/A
				0	0	0	0	0	0	0	0	#N/A
				0	0	0	0	0	0	0	0	#N/A
				0	0	0	0	0	0	0	0	#N/A
				0	0	0	0	0	0	0	0	#N/A
				0	0	0	0	0	0	0	0	#N/A
				0	0	0	0	0	0	0	0	#N/A
				0	0	0	0	0	0	0	0	#N/A
				0	0	0	0	0	0	0	0	#N/A
				0	0	0	0	0	0	0	0	#N/A
				0	0	0	0	0	0	0	0	#N/A
				0	0	0	0	0	0	0	0	#N/A
				0	0	0	0	0	0	0	0	#N/A
				0	0	0	0	0	0	0	0	#N/A
				0	0	0	0	0	0	0	0	#N/A
				0	0	0	0	0	0	0	0	#N/A
				0	0	0	0	0	0	0	0	#N/A
				0	0	0	0	0	0	0	0	#N/A
				0	0	0	0	0	0	0	0	#N/A
				0	0	0	0	0	0	0	0	#N/A
				0	0	0	0	0	0	0	0	#N/A
				0	0	0	0	0	0	0	0	#N/A
				0	0	0	0	0	0	0	0	#N/A
				0	0	0	0	0	0	0	0	#N/A
				0	0	0	0	0	0	0	0	#N/A
				0	0	0	0	0	0	0	0	#N/A
				0	0	0	0	0	0	0	0	#N/A
				0	0	0	0	0	0	0	0	#N/A
				0	0	0	0	0	0	0	0	#N/A
				0	0	0	0	0	0	0	0	#N/A
				0	0	0	0	0	0	0	0	#N/A
				0	0	0	0	0	0	0	0	#N/A
				0	0	0	0	0	0	0	0	#N/A
				0	0	0	0	0	0	0	0	#N/A
				0	0	0	0	0	0	0	0	#N/A
				0	0	0	0	0	0	0	0	#N/A
				0	0	0	0	0	0	0	0	#N/A
				0	0	0	0	0	0	0	0	#N/A
				0	0	0	0	0	0	0	0	#N/A
				0	0	0	0	0	0	0	0	#N/A
				0	0	0	0	0	0	0	0	#N/A
				0	0	0	0	0	0	0	0	#N/A
				0	0	0	0	0	0	0	0	#N/A
				0	0	0	0	0	0	0	0	#N/A
				0	0	0	0	0	0	0	0	#N/A
				0	0	0	0	0	0	0	0	#N/A
				0	0	0	0	0	0	0	0	#N/A
				0	0	0	0	0	0	0	0	#N/A
				0	0	0	0	0	0	0	0	#N/A
				0	0	0	0	0	0	0	0	#N/A
				0	0	0	0	0	0	0	0	#N/A
				0	0	0	0	0	0	0	0	#N/A
				0	0	0	0	0	0	0	0	#N/A
				0	0	0	0	0	0	0	0	#N/A
				0	0	0	0	0	0	0	0	#N/A
				0	0	0	0	0	0	0	0	#N/A
				0	0	0	0	0	0	0	0	#N/A
				0	0	0	0	0	0	0	0	#N/A
				0	0	0	0	0	0	0	0	#N/A
				0	0	0	0	0	0	0	0	#N/A
				0	0	0	0	0	0	0	0	#N/A
				0	0	0	0	0	0	0	0	#N/A
				0	0	0	0	0	0	0	0	#N/A
				0	0	0	0	0	0	0	0	#N/A
				0	0	0	0	0	0	0	0	#N/A
				0	0	0	0	0	0	0	0	#N/A
				0	0	0	0	0	0	0	0	#N/A
				0	0	0	0	0	0	0	0	#N/A
				0	0	0	0	0	0	0	0	#N/A
				0	0	0	0	0	0	0	0	#N/A
				0	0	0	0	0	0	0	0	#N/A
				0	0	0	0	0	0	0	0	#N/A
				0	0	0	0	0	0	0	0	#N/A
				0	0	0	0	0	0	0	0	#N/A
				0	0	0	0	0	0	0	0	#N/A
				0	0	0	0	0	0	0	0	#N/A
				0	0	0	0	0	0	0	0	#N/A
				0	0	0	0	0	0	0	0	#N/A
				0	0	0	0	0	0	0	0	#N/A
				0	0	0	0	0	0	0	0	#N/A
				0	0	0	0	0	0	0	0	#N/A
				0	0	0	0	0	0	0	0	#N/A
				0	0	0	0	0	0	0	0	#N/A
				0	0	0	0	0	0	0	0	#N/A
				0	0	0	0	0	0	0	0	#N/A
				0	0	0	0	0	0	0	0	#N/A
				0	0	0	0	0	0	0	0	#N/A
				0	0	0	0	0	0	0	0	#N/A
				0	0	0	0	0	0	0	0	#N/A
				0	0	0	0	0	0	0	0	#N/A
				0	0	0	0	0	0	0	0	#N/A
				0	0	0	0	0	0	0	0	#N/A
				0	0	0	0	0	0	0	0	#N/A
				0	0	0	0	0	0	0	0	#N/A
				0	0	0	0	0	0	0	0	#N/A
				0	0	0	0	0	0	0	0	#N/A
				0	0	0	0	0	0	0	0	#N/A
				0	0	0	0	0	0	0	0	#N/A
				0	0	0	0	0	0	0	0	#N/A
				0	0	0	0	0	0	0	0	#N/A
				0	0	0	0	0	0	0	0	#N/A
				0	0	0	0	0	0	0	0	#N/A
				0	0	0	0	0	0	0	0	#N/A
				0	0	0	0	0	0	0	0	#N/A
				0	0	0	0	0	0	0	0	#N/A
				0	0	0	0	0	0	0	0	#N/A
				0	0	0	0	0	0	0	0	#N/A
				0	0	0	0	0	0	0	0	#N/A
				0	0	0	0	0	0	0	0	#N/A
				0	0	0	0	0	0	0	0	#N/A
				0	0	0	0	0	0	0	0	#N/A
				0	0	0	0	0	0	0	0	#N/A
				0	0	0	0	0	0	0	0	#N/A
				0	0	0	0	0	0	0	0	#N/A
				0	0	0	0	0	0	0	0	#N/A
				0	0	0	0	0	0	0	0	#N/A
				0	0	0	0	0	0	0	0	#N/A
				0	0	0	0	0	0	0	0	#N/A
				0	0	0	0	0	0	0	0	#N/A
				0	0	0	0	0	0	0	0	#N/A
				0	0	0	0	0	0	0	0	#N/A
				0	0	0	0	0	0	0	0	#N/A
				0	0	0	0	0	0	0	0	#N/A
				0	0	0	0	0	0	0	0	#N/A
				0	0	0	0	0	0	0	0	#N/A
				0	0	0	0	0	0	0	0	#N/A
				0	0	0	0	0	0	0	0	#N/A
				0	0	0	0	0	0	0	0	#N/A
				0	0	0	0	0	0	0	0	#N/A
				0	0	0	0	0	0	0	0	#N/A
				0	0	0	0	0	0	0	0	#N/A
				0	0	0	0	0	0	0	0	#N/A
				0	0	0	0	0	0	0	0	#N/A
				0	0	0	0	0	0	0	0	#N/A
				0	0	0	0	0	0	0	0	#N/A
				0	0	0	0	0	0	0	0	#N/A
				0	0	0	0	0	0	0	0	#N/A
				0	0	0	0	0	0	0	0	#N/A
				0	0	0	0	0	0	0	0	#N/A
				0	0	0	0	0	0	0	0	#N/A
				0	0	0	0	0	0	0	0	#N/A
				0	0	0	0	0	0	0	0	#N/A
				0	0	0	0	0	0	0	0	#N/A
				0	0	0	0	0	0	0	0	#N/A
				0	0	0	0	0	0	0	0	#N/A
				0	0	0	0	0	0	0	0	#N/A
				0	0	0	0	0	0	0	0	#N/A
				0	0	0	0	0	0	0	0	#N/A
				0	0	0	0	0	0	0	0	#N/A
				0	0	0	0	0	0	0	0	#N/A
				0	0	0	0	0	0	0	0	#N/A
				0	0	0	0	0	0	0	0	#N/A
				0	0	0	0	0	0	0	0	#N/A
				0	0	0	0	0	0	0	0	#N/A
				0	0	0	0	0	0	0	0	#N/A
				0	0	0	0	0	0	0	0	#N/A
				0	0	0	0	0	0	0	0	#N/A
				0	0	0	0	0	0	0	0	#N/A
				0	0	0	0	0	0	0	0	#N/A
				0	0	0	0	0	0	0	0	#N/A
				0	0	0	0	0	0	0	0	#N/A
				0	0	0	0	0	0	0	0	#N/A
				0	0	0	0	0	0	0	0	#N/A
				0	0	0	0	0	0	0	0	#N/A
				0	0	0	0	0	0	0	0	#N/A
				0	0	0	0	0	0	0	0	#N/A
				0	0	0	0	0	0	0	0	#N/A
				0	0	0	0	0	0	0	0	#N/A
				0	0	0	0	0	0	0	0	#N/A
				0	0	0	0	0	0	0	0	#N/A
				0	0	0	0	0	0	0	0	#N/A
				0	0	0	0	0	0	0	0	#N/A
				0	0	0	0	0	0	0	0	#N/A
				0	0	0	0	0	0	0	0	#N/A
				0	0	0	0	0	0	0	0	#N/A
				0	0	0	0	0	0	0	0	#N/A
				0	0	0	0	0	0	0	0	#N/A
				0	0	0	0	0	0	0	0	#N/A
				0	0	0	0	0	0	0	0	#N/A
				0	0	0	0	0	0	0	0	#N/A
				0	0	0	0	0	0	0	0	#N/A
				0	0	0	0	0	0	0	0	#N/A
				0	0	0	0	0	0	0	0	#N/A
				0	0	0	0	0	0	0	0	#N/A
				0	0	0	0	0	0	0	0	#N/A
				0	0	0	0	0	0	0	0	#N/A
				0	0	0	0	0	0	0	0	#N/A
				0	0	0	0	0	0	0	0	#N/A
				0	0	0	0	0	0	0	0	#N/A
				0	0	0	0	0	0	0	0	#N/A
				0	0	0	0	0	0	0	0	#N/A
				0	0	0	0	0	0	0	0	#N/A
				0	0	0	0	0	0	0	0	#N/A
				0	0	0	0	0	0	0	0	#N/A
				0	0	0	0	0	0	0	0	#N/A
				0	0	0	0	0	0	0	0	#N/A
				0	0	0	0	0	0	0	0	#N/A
				0	0	0	0	0	0	0	0	#N/A
				0	0	0	0	0	0	0	0	#N/A
				0	0	0	0	0	0	0	0	#N/A
				0	0	0	0	0	0	0	0	#N/A
				0	0	0	0	0	0	0	0	#N/A
				0	0	0	0	0	0	0	0	#N/A
				0	0	0	0	0	0	0	0	#N/A
				0	0	0	0	0	0	0	0	#N/A
				0	0	0	0	0	0	0	0	#N/A
				0	0	0	0	0	0	0	0	#N/A
				0	0	0	0	0	0	0	0	#N/A
				0	0	0	0	0	0	0	0	#N/A
				0	0	0	0	0	0	0	0	#N/A
				0	0	0	0	0	0	0	0	#N/A
				0	0	0	0	0	0	0	0	#N/A
				0	0	0	0	0	0	0	0	#N/A
				0	0	0	0	0	0	0	0	#N/A
				0	0	0	0	0	0	0	0	#N/A
				0	0	0	0	0	0	0	0	#N/A
				0	0	0	0	0	0	0	0	#N/A
				0	0	0	0	0	0	0	0	#N/A
				0	0	0	0	0	0	0	0	#N/A
				0	0	0	0	0	0	0	0	#N/A
				0	0	0	0	0	0	0	0	#N/A
				0	0	0	0	0	0	0	0	#N/A
				0	0	0	0	0	0	0	0	#N/A
				0	0	0	0	0	0	0	0	#N/A
				0	0	0	0	0	0	0	0	#N/A
				0	0	0	0	0	0	0	0	#N/A
				0	0	0	0	0	0	0	0	#N/A
				0	0	0	0	0	0	0	0	#N/A
				0	0	0	0	0	0	0	0	#N/A
				0	0	0	0	0	0	0	0	#N/A
				0	0	0	0	0	0	0	0	#N/A
				0	0	0	0	0	0	0	0	#N/A
				0	0	0	0	0	0	0	0	#N/A
				0	0	0	0	0	0	0	0	#N/A
				0	0	0	0	0	0	0	0	#N/A
				0	0	0	0	0	0	0	0	#N/A
				0	0	0	0	0	0	0	0	#N/A
				0	0	0	0	0	0	0	0	#N/A
				0	0	0	0	0	0	0	0	#N/A
				0	0	0	0	0	0	0	0	#N/A
				0	0	0	0	0	0	0	0	#N/A
				0	0	0	0	0	0	0	0	#N/A
				0	0	0	0	0	0	0	0	#N/A
				0	0	0	0	0	0	0	0	#N/A
				0	0	0	0	0	0	0	0	#N/A
				0	0	0	0	0	0	0	0	#N/A
				0	0	0	0	0	0	0	0	#N/A
				0	0	0	0	0	0	0	0	#N/A
				0	0	0	0	0	0	0	0	#N/A
				0	0	0	0	0	0	0	0	#N/A
				0	0	0	0	0	0	0	0	#N/A
				0	0	0	0	0	0	0	0	#N/A
				0	0	0	0	0	0	0	0	#N/A
				0	0	0	0	0	0	0	0	#N/A
				0	0	0	0	0	0	0	0	#N/A
				0	0	0	0	0	0	0	0	#N/A
				0	0	0	0	0	0	0	0	#N/A
				0	0	0	0	0	0	0	0	#N/A
				0	0	0	0	0	0	0	0	#N/A
				0	0	0	0	0	0	0	0	#N/A
				0	0	0	0	0	0	0	0	#N/A
				0	0	0	0	0	0	0	0	#N/A
				0	0	0	0	0	0	0	0	#N/A
				0	0	0	0	0	0	0	0	#N/A
				0	0	0	0	0	0	0	0	#N/A
				0	0	0	0	0	0	0	0	#N/A
				0	0	0	0	0	0	0	0	#N/A
				0	0	0	0	0	0	0	0	#N/A
				0	0	0	0	0	0	0	0	#N/A
				0	0	0	0	0	0	0	0	#N/A
				0	0	0	0	0	0	0	0	#N/A
				0	0	0	0	0	0	0	0	#N/A
				0	0	0	0	0	0	0	0	#N/A
				0	0	0	0	0	0	0	0	#N/A
				0	0	0	0	0	0	0	0	#N/A
				0	0	0	0	0	0	0	0	#N/A
				0	0	0	0	0	0	0	0	#N/A
				0	0	0	0	0	0	0	0	#N/A
				0	0	0	0	0	0	0	0	#N/A
				0	0	0	0	0	0	0	0	#N/A
				0	0	0	0	0	0	0	0	#N/A
				0	0	0	0	0	0	0	0	#N/A
				0	0	0	0	0	0	0	0	#N/A
				0	0	0	0	0	0	0	0	#N/A
				0	0	0	0	0	0	0	0	#N/A
				0	0	0	0	0	0	0	0	#N/A
				0	0	0	0	0	0	0	0	#N/A
				0	0	0	0	0	0	0	0	#N/A
				0	0	0	0	0	0	0	0	#N/A
				0	0	0	0	0	0	0	0	#N/A
				0	0	0	0	0	0	0	0	#N/A
				0	0	0	0	0	0	0	0	#N/A
				0	0	0	0	0	0	0	0	#N/A
				0	0	0	0	0	0	0	0	#N/A
				0	0	0	0	0	0	0	0	#N/A
				0	0	0	0	0	0	0	0	#N/A
				0	0	0	0	0	0	0	0	#N/A
				0	0	0	0	0	0	0	0	#N/A
				0	0	0	0	0	0	0	0	#N/A
				0	0	0	0	0	0	0	0	#N/A
				0	0	0	0	0	0	0	0	#N/A
				0	0	0	0	0	0	0	0	#N/A
				0	0	0	0	0	0	0	0	#N/A
				0	0	0	0	0	0	0	0	#N/A
				0	0	0	0	0	0	0	0	#N/A
				0	0	0	0	0	0	0	0	#N/A
				0	0	0	0	0	0	0	0	#N/A
				0	0	0	0	0	0	0	0	#N/A
				0	0	0	0	0	0	0	0	#N/A
				0	0	0	0	0	0	0	0	#N/A
				0	0	0	0	0	0	0	0	#N/A
				0	0	0	0	0	0	0	0	#N/A
				0	0	0	0	0	0	0	0	#N/A
				0	0	0	0	0	0	0	0	#N/A
				0	0	0	0	0	0	0	0	#N/A
				0	0	0	0	0	0	0	0	#N/A
				0	0	0	0	0	0	0	0	#N/A
				0	0	0	0	0	0	0	0	#N/A
				0	0	0	0	0	0	0	0	#N/A
				0	0	0	0	0	0	0	0	#N/A
				0	0	0	0	0	0	0	0	#N/A
				0	0	0	0	0	0	0	0	#N/A
				0	0	0	0	0	0	0	0	#N/A
				0	0	0	0	0	0	0	0	#N/A
				0	0	0	0	0	0	0	0	#N/A
				0	0	0	0	0	0	0	0	#N/A
				0	0	0	0	0	0	0	0	#N/A
				0	0	0	0	0	0	0	0	#N/A
				0	0	0	0	0	0	0	0	#N/A
				0	0	0	0	0	0	0	0	#N/A
				0	0	0	0	0	0	0	0	#N/A
				0	0	0	0	0	0	0	0	#N/A
				0	0	0	0	0	0	0	0	#N/A
				0	0	0	0	0	0	0	0	#N/A
				0	0	0	0	0	0	0	0	#N/A
				0	0	0	0	0	0	0	0	#N/A
				0	0	0	0	0	0	0	0	#N/A
				0	0	0	0	0	0	0	0	#N/A
				0	0	0	0	0	0	0	0	#N/A
				0	0	0	0	0	0	0	0	#N/A
				0	0	0	0	0	0	0	0	#N/A
				0	0	0	0	0	0	0	0	#N/A
				0	0	0	0	0	0	0	0	#N/A
				0	0	0	0	0	0	0	0	#N/A
				0	0	0	0	0	0	0	0	#N/A
				0	0	0	0	0	0	0	0	#N/A
				0	0	0	0	0	0	0	0	#N/A
				0	0	0	0	0	0	0	0	#N/A
				0	0	0	0	0	0	0	0	#N/A
				0	0	0	0	0	0	0	0	#N/A
				0	0	0	0	0	0	0	0	#N/A
				0	0	0	0	0	0	0	0	#N/A
				0	0	0	0	0	0	0	0	#N/A
				0	0	0	0	0	0	0	0	#N/A
				0	0	0	0	0	0	0	0	#N/A
				0	0	0	0	0	0	0	0	#N/A
				0	0	0	0	0	0	0	0	#N/A
				0	0	0	0	0	0	0	0	#N/A
				0	0	0	0	0	0	0	0	#N/A
				0	0	0	0	0	0	0	0	#N/A
				0	0	0	0	0	0	0	0	#N/A
				0	0	0	0	0	0	0	0	#N/A
				0	0	0	0	0	0	0	0	#N/A
				0	0	0	0	0	0	0	0	#N/A
				0	0	0	0	0	0	0	0	#N/A
				0	0	0	0	0	0	0	0	#N/A
				0	0	0	0	0	0	0	0	#N/A
				0	0	0	0	0	0	0	0	#N/A
				0	0	0	0	0	0	0	0	#N/A
				0	0	0	0	0	0	0	0	#N/A
				0	0	0	0	0	0	0	0	#N/A
				0	0	0	0	0	0	0	0	#N/A
				0	0	0	0	0	0	0	0	#N/A
				0	0	0	0	0	0	0	0	#N/A
				0	0	0	0	0	0	0	0	#N/A
				0	0	0	0	0	0	0	0	#N/A
				0	0	0	0	0	0	0	0	#N/A
				0	0	0	0	0	0	0	0	#N/A
				0	0	0	0	0	0	0	0	#N/A
				0	0	0	0	0	0	0	0	#N/A
				0	0	0	0	0	0	0	0	#N/A
				0	0	0	0	0	0	0	0	#N/A
				0	0	0	0	0	0	0	0	#N/A
				0	0	0	0	0	0	0	0	#N/A
				0	0	0	0	0	0	0	0	#N/A
				0	0	0	0	0	0	0	0	#N/A
				0	0	0	0	0	0	0	0	#N/A
				0	0	0	0	0	0	0	0	#N/A
				0	0	0	0	0	0	0	0	#N/A
				0	0	0	0	0	0	0	0	#N/A
				0	0	0	0	0	0	0	0	#N/A
				0	0	0	0	0	0	0	0	#N/A
				0	0	0	0	0	0	0	0	#N/A
				0	0	0	0	0	0	0	0	#N/A
				0	0	0	0	0	0	0	0	#N/A
				0	0	0	0	0	0	0	0	#N/A
				0	0	0	0	0	0	0	0	#N/A
				0	0	0	0	0	0	0	0	#N/A
				0	0	0	0	0	0	0	0	#N/A
				0	0	0	0	0	0	0	0	#N/A
				0	0	0	0	0	0	0	0	#N/A
				0	0	0	0	0	0	0	0	#N/A
				0	0	0	0	0	0	0	0	#N/A
				0	0	0	0	0	0	0	0	#N/A
				0	0	0	0	0	0	0	0	#N/A
				0	0	0	0	0	0	0	0	#N/A
				0	0	0	0	0	0	0	0	#N/A
				0	0	0	0	0	0	0	0	#N/A
				0	0	0	0	0	0	0	0	#N/A
				0	0	0	0	0	0	0	0	#N/A
				0	0	0	0	0	0	0	0	#N/A
				0	0	0	0	0	0	0	0	#N/A
				0	0	0	0	0	0	0	0	#N/A
				0	0	0	0	0	0	0	0	#N/A
				0	0	0	0	0	0	0	0	#N/A
				0	0	0	0	0	0	0	0	#N/A
				0	0	0	0	0	0	0	0	#N/A
				0	0	0	0	0	0	0	0	#N/A
				0	0	0	0	0	0	0	0	#N/A
				0	0	0	0	0	0	0	0	#N/A
				0	0	0	0	0	0	0	0	#N/A
				0	0	0	0	0	0	0	0	#N/A
				0	0	0	0	0	0	0	0	#N/A
				0	0	0	0	0	0	0	0	#N/A
				0	0	0	0	0	0	0	0	#N/A
				0	0	0	0	0	0	0	0	#N/A
				0	0	0	0	0	0	0	0	#N/A
				0	0	0	0	0	0	0	0	#N/A
				0	0	0	0	0	0	0	0	#N/A
				0	0	0	0	0	0	0	0	#N/A
				0	0	0	0	0	0	0	0	#N/A
				0	0	0	0	0	0	0	0	#N/A
				0	0	0	0	0	0	0	0	#N/A
				0	0	0	0	0	0	0	0	#N/A
				0	0	0	0	0	0	0	0	#N/A
				0	0	0	0	0	0	0	0	#N/A
				0	0	0	0	0	0	0	0	#N/A
				0	0	0	0	0	0	0	0	#N/A
				0	0	0	0	0	0	0	0	#N/A
				0	0	0	0	0	0	0	0	#N/A
				0	0	0	0	0	0	0	0	#N/A
				0	0	0	0	0	0	0	0	#N/A
				0	0	0	0	0	0	0	0	#N/A
				0	0	0	0	0	0	0	0	#N/A
				0	0	0	0	0	0	0	0	#N/A
				0	0	0	0	0	0	0	0	#N/A
				0	0	0	0	0	0	0	0	#N/A
				0	0	0	0	0	0	0	0	#N/A
				0	0	0	0	0	0	0	0	#N/A
				0	0	0	0	0	0	0	0	#N/A
				0	0	0	0	0	0	0	0	#N/A
				0	0	0	0	0	0	0	0	#N/A
				0	0	0	0	0	0	0	0	#N/A
				0	0	0	0	0	0	0	0	#N/A
				0	0	0	0	0	0	0	0	#N/A
				0	0	0	0	0	0	0	0	#N/A
				0	0	0	0	0	0	0	0	#N/A
				0	0	0	0	0	0	0	0	#N/A
				0	0	0	0	0	0	0	0	#N/A
				0	0	0	0	0	0	0	0	#N/A
				0	0	0	0	0	0	0	0	#N/A
				0	0	0	0	0	0	0	0	#N/A
				0	0	0	0	0	0	0	0	#N/A
				0	0	0	0	0	0	0	0	#N/A
				0	0	0	0	0	0	0	0	#N/A
				0	0	0	0	0	0	0	0	#N/A
				0	0	0	0	0	0	0	0	#N/A
				0	0	0	0	0	0	0	0	#N/A
				0	0	0	0	0	0	0	0	#N/A
				0	0	0	0	0	0	0	0	#N/A
				0	0	0	0	0	0	0	0	#N/A
				0	0	0	0	0	0	0	0	#N/A
				0	0	0	0	0	0	0	0	#N/A
				0	0	0	0	0	0	0	0	#N/A
				0	0	0	0	0	0	0	0	#N/A
				0	0	0	0	0	0	0	0	#N/A
				0	0	0	0	0	0	0	0	#N/A
				0	0	0	0	0	0	0	0	#N/A
				0	0	0	0	0	0	0	0	#N/A
				0	0	0	0	0	0	0	0	#N/A
				0	0	0	0	0	0	0	0	#N/A
				0	0	0	0	0	0	0	0	#N/A
				0	0	0	0	0	0	0	0	#N/A
				0	0	0	0	0	0	0	0	#N/A
				0	0	0	0	0	0	0	0	#N/A
				0	0	0	0	0	0	0	0	#N/A
				0	0	0	0	0	0	0	0	#N/A
				0	0	0	0	0	0	0	0	#N/A
				0	0	0	0	0	0	0	0	#N/A
				0	0	0	0	0	0	0	0	#N/A
				0	0	0	0	0	0	0	0	#N/A
				0	0	0	0	0	0	0	0	#N/A
				0	0	0	0	0	0	0	0	#N/A
				0	0	0	0	0	0	0	0	#N/A
				0	0	0	0	0	0	0	0	#N/A
				0	0	0	0	0	0	0	0	#N/A
				0	0	0	0	0	0	0	0	#N/A
				0	0	0	0	0	0	0	0	#N/A
				0	0	0	0	0	0	0	0	#N/A
				0	0	0	0	0	0	0	0	#N/A
				0	0	0	0	0	0	0	0	#N/A
				0	0	0	0	0	0	0	0	#N/A
				0	0	0	0	0	0	0	0	#N/A
				0	0	0	0	0	0	0	0	#N/A
				0	0	0	0	0	0	0	0	#N/A
				0	0	0	0	0	0	0	0	#N/A
				0	0	0	0	0	0	0	0	#N/A
				0	0	0	0	0	0	0	0	#N/A
				0	0	0	0	0	0	0	0	#N/A
				0	0	0	0	0	0	0	0	#N/A
				0	0	0	0	0	0	0	0	#N/A
				0	0	0	0	0	0	0	0	#N/A
				0	0	0	0	0	0	0	0	#N/A
				0	0	0	0	0	0	0	0	#N/A
				0	0	0	0	0	0	0	0	#N/A
				0	0	0	0	0	0	0	0	#N/A
				0	0	0	0	0	0	0	0	#N/A
				0	0	0	0	0	0	0	0	#N/A
				0	0	0	0	0	0	0	0	#N/A
				0	0	0	0	0	0	0	0	#N/A
				0	0	0	0	0	0	0	0	#N/A
				0	0	0	0	0	0	0	0	#N/A
				0	0	0	0	0	0	0	0	#N/A
				0	0	0	0	0	0	0	0	#N/A
				0	0	0	0	0	0	0	0	#N/A
				0	0	0	0	0	0	0	0	#N/A
				0	0	0	0	0	0	0	0	#N/A
				0	0	0	0	0	0	0	0	#N/A
				0	0	0	0	0	0	0	0	#N/A
				0	0	0	0	0	0	0	0	#N/A
				0	0	0	0	0	0	0	0	#N/A
				0	0	0	0	0	0	0	0	#N/A
				0	0	0	0	0	0	0	0	#N/A
				0	0	0	0	0	0	0	0	#N/A
				0	0	0	0	0	0	0	0	#N/A
				0	0	0	0	0	0	0	0	#N/A
				0	0	0	0	0	0	0	0	#N/A
				0	0	0	0	0	0	0	0	#N/A
				0	0	0	0	0	0	0	0	#N/A
				0	0	0	0	0	0	0	0	#N/A
				0	0	0	0	0	0	0	0	#N/A
				0	0	0	0	0	0	0	0	#N/A
				0	0	0	0	0	0	0	0	#N/A
				0	0	0	0	0	0	0	0	#N/A
				0	0	0	0	0	0	0	0	#N/A
				0	0	0	0	0	0	0	0	#N/A
				0	0	0	0	0	0	0	0	#N/A
				0	0	0	0	0	0	0	0	#N/A
				0	0	0	0	0	0	0	0	#N/A
				0	0	0	0	0	0	0	0	#N/A
				0	0	0	0	0	0	0	0	#N/A
				0	0	0	0	0	0	0	0	#N/A
				0	0	0	0	0	0	0	0	#N/A
				0	0	0	0	0	0	0	0	#N/A
				0	0	0	0	0	0	0	0	#N/A
				0	0	0	0	0	0	0	0	#N/A
				0	0	0	0	0	0	0	0	#N/A
				0	0	0	0	0	0	0	0	#N/A
				0	0	0	0	0	0	0	0	#N/A
				0	0	0	0	0	0	0	0	#N/A
				0	0	0	0	0	0	0	0	#N/A
				0	0	0	0	0	0	0	0	#N/A
				0	0	0	0	0	0	0	0	#N/A
				0	0	0	0	0	0	0	0	#N/A
				0	0	0	0	0	0	0	0	#N/A
				0	0	0	0	0	0	0	0	#N/A
				0	0	0	0	0	0	0	0	#N/A
				0	0	0	0	0	0	0	0	#N/A
				0	0	0	0	0	0	0	0	#N/A
				0	0	0	0	0	0	0	0	#N/A
				0	0	0	0	0	0	0	0	#N/A
				0	0	0	0	0	0	0	0	#N/A
				0	0	0	0	0	0	0	0	#N/A
				0	0	0	0	0	0	0	0	#N/A
				0	0	0	0	0	0	0	0	#N/A
				0	0	0	0	0	0	0	0	#N/A
				0	0	0	0	0	0	0	0	#N/A
				0	0	0	0	0	0	0	0	#N/A
				0	0	0	0	0	0	0	0	#N/A
				0	0	0	0	0	0	0	0	#N/A
				0	0	0	0	0	0	0	0	#N/A
				0	0	0	0	0	0	0	0	#N/A
				0	0	0	0	0	0	0	0	#N/A
				0	0	0	0	0	0	0	0	#N/A
				0	0	0	0	0	0	0	0	#N/A
				0	0	0	0	0	0	0	0	#N/A
				0	0	0	0	0	0	0	0	#N/A
				0	0	0	0	0	0	0	0	#N/A
				0	0	0	0	0	0	0	0	#N/A
				0	0	0	0	0	0	0	0	#N/A
				0	0	0	0	0	0	0	0	#N/A
				0	0	0	0	0	0	0	0	#N/A
				0	0	0	0	0	0	0	0	#N/A
				0	0	0	0	0	0	0	0	#N/A
				0	0	0	0	0	0	0	0	#N/A
				0	0	0	0	0	0	0	0	#N/A
				0	0	0	0	0	0	0	0	#N/A
				0	0	0	0	0	0	0	0	#N/A
				0	0	0	0	0	0	0	0	#N/A
				0	0	0	0	0	0	0	0	#N/A
				0	0	0	0	0	0	0	0	#N/A
				0	0	0	0	0	0	0	0	#N/A
				0	0	0	0	0	0	0	0	#N/A
				0	0	0	0	0	0	0	0	#N/A
				0	0	0	0	0	0	0	0	#N/A
				0	0	0	0	0	0	0	0	#N/A
				0	0	0	0	0	0	0	0	#N/A
				0	0	0	0	0	0	0	0	#N/A
				0	0	0	0	0	0	0	0	#N/A
				0	0	0	0	0	0	0	0	#N/A
				0	0	0	0	0	0	0	0	#N/A
				0	0	0	0	0	0	0	0	#N/A
				0	0	0	0	0	0	0	0	#N/A
				0	0	0	0	0	0	0	0	#N/A
				0	0	0	0	0	0	0	0	#N/A
				0	0	0	0	0	0	0	0	#N/A
				0	0	0	0	0	0	0	0	#N/A
				0	0	0	0	0	0	0	0	#N/A
				0	0	0	0	0	0	0	0	#N/A
				0	0	0	0	0	0	0	0	#N/A
				0	0	0	0	0	0	0	0	#N/A
				0	0	0	0	0	0	0	0	#N/A
				0	0	0	0	0	0	0	0	#N/A
				0	0	0	0	0	0	0	0	#N/A
				0	0	0	0	0	0	0	0	#N/A
				0	0	0	0	0	0	0	0	#N/A
				0	0	0	0	0	0	0	0	#N/A
				0	0	0	0	0	0	0	0	#N/A
				0	0	0	0	0	0	0	0	#N/A
				0	0	0	0	0	0	0	0	#N/A
				0	0	0	0	0	0	0	0	#N/A
				0	0	0	0	0	0	0	0	#N/A
				0	0	0	0	0	0	0	0	#N/A
				0	0	0	0	0	0	0	0	#N/A
				0	0	0	0	0	0	0	0	#N/A
				0	0	0	0	0	0	0	0	#N/A
				0	0	0	0	0	0	0	0	#N/A
				0	0	0	0	0	0	0	0	#N/A
				0	0	0	0	0	0	0	0	#N/A
				0	0	0	0	0	0	0	0	#N/A
				0	0	0	0	0	0	0	0	#N/A
				0	0	0	0	0	0	0	0	#N/A
				0	0	0	0	0	0	0	0	#N/A
				0	0	0	0	0	0	0	0	#N/A
				0	0	0	0	0	0	0	0	#N/A
				0	0	0	0	0	0	0	0	#N/A
				0	0	0	0	0	0	0	0	#N/A
				0	0	0	0	0	0	0	0	#N/A
				0	0	0	0	0	0	0	0	#N/A
				0	0	0	0	0	0	0	0	#N/A
				0	0	0	0	0	0	0	0	#N/A
				0	0	0	0	0	0	0	0	#N/A
				0	0	0	0	0	0	0	0	#N/A
				0	0	0	0	0	0	0	0	#N/A
				0	0	0	0	0	0	0	0	#N/A
				0	0	0	0	0	0	0	0	#N/A
				0	0	0	0	0	0	0	0	#N/A
				0	0	0	0	0	0	0	0	#N/A
				0	0	0	0	0	0	0	0	#N/A
				0	0	0	0	0	0	0	0	#N/A
				0	0	0	0	0	0	0	0	#N/A
				0	0	0	0	0	0	0	0	#N/A
				0	0	0	0	0	0	0	0	#N/A
				0	0	0	0	0	0	0	0	#N/A
				0	0	0	0	0	0	0	0	#N/A
				0	0	0	0	0	0	0	0	#N/A
				0	0	0	0	0	0	0	0	#N/A
				0	0	0	0	0	0	0	0	#N/A
				0	0	0	0	0	0	0	0	#N/A
				0	0	0	0	0	0	0	0	#N/A
				0	0	0	0	0	0	0	0	#N/A
				0	0	0	0	0	0	0	0	#N/A
				0	0	0	0	0	0	0	0	#N/A
				0	0	0	0	0	0	0	0	#N/A
				0	0	0	0	0	0	0	0	#N/A
				0	0	0	0	0	0	0	0	#N/A
				0	0	0	0	0	0	0	0	#N/A
				0	0	0	0	0	0	0	0	#N/A
				0	0	0	0	0	0	0	0	#N/A
				0	0	0	0	0	0	0	0	#N/A
				0	0	0	0	0	0	0	0	#N/A
				0	0	0	0	0	0	0	0	#N/A
				0	0	0	0	0	0	0	0	#N/A
				0	0	0	0	0	0	0	0	#N/A
				0	0	0	0	0	0	0	0	#N/A
				0	0	0	0	0	0	0	0	#N/A
				0	0	0	0	0	0	0	0	#N/A
				0	0	0	0	0	0	0	0	#N/A
				0	0	0	0	0	0	0	0	#N/A
				0	0	0	0	0	0	0	0	#N/A
				0	0	0	0	0	0	0	0	#N/A
				0	0	0	0	0	0	0	0	#N/A
				0	0	0	0	0	0	0	0	#N/A
				0	0	0	0	0	0	0	0	#N/A
				0	0	0	0	0	0	0	0	#N/A
				0	0	0	0	0	0	0	0	#N/A
				0	0	0	0	0	0	0	0	#N/A
				0	0	0	0	0	0	0	0	#N/A
				0	0	0	0	0	0	0	0	#N/A
				0	0	0	0	0	0	0	0	#N/A
				0	0	0	0	0	0	0	0	#N/A
				0	0	0	0	0	0	0	0	#N/A
				0	0	0	0	0	0	0	0	#N/A
				0	0	0	0	0	0	0	0	#N/A
				0	0	0	0	0	0	0	0	#N/A
				0	0	0	0	0	0	0	0	#N/A
				0	0	0	0	0	0	0	0	#N/A
				0	0	0	0	0	0	0	0	#N/A
				0	0	0	0	0	0	0	0	#N/A
				0	0	0	0	0	0	0	0	#N/A
				0	0	0	0	0	0	0	0	#N/A
				0	0	0	0	0	0	0	0	#N/A
				0	0	0	0	0	0	0	0	#N/A
				0	0	0	0	0	0	0	0	#N/A
				0	0	0	0	0	0	0	0	#N/A
				0	0	0	0	0	0	0	0	#N/A
				0	0	0	0	0	0	0	0	#N/A
				0	0	0	0	0	0	0	0	#N/A
				0	0	0	0	0	0	0	0	#N/A
				0	0	0	0	0	0	0	0	#N/A
				0	0	0	0	0	0	0	0	#N/A
				0	0	0	0	0	0	0	0	#N/A
				0	0	0	0	0	0	0	0	#N/A
				0	0	0	0	0	0	0	0	#N/A
				0	0	0	0	0	0	0	0	#N/A
				0	0	0	0	0	0	0	0	#N/A
				0	0	0	0	0	0	0	0	#N/A
				0	0	0	0	0	0	0	0	#N/A
				0	0	0	0	0	0	0	0	#N/A
				0	0	0	0	0	0	0	0	#N/A
				0	0	0	0	0	0	0	0	#N/A
				0	0	0	0	0	0	0	0	#N/A
				0	0	0	0	0	0	0	0	#N/A
				0	0	0	0	0	0	0	0	#N/A
				0	0	0	0	0	0	0	0	#N/A
				0	0	0	0	0	0	0	0	#N/A
				0	0	0	0	0	0	0	0	#N/A
				0	0	0	0	0	0	0	0	#N/A
				0	0	0	0	0	0	0	0	#N/A
				0	0	0	0	0	0	0	0	#N/A
				0	0	0	0	0	0	0	0	#N/A
				0	0	0	0	0	0	0	0	#N/A
				0	0	0	0	0	0	0	0	#N/A
				0	0	0	0	0	0	0	0	#N/A
				0	0	0	0	0	0	0	0	#N/A
				0	0	0	0	0	0	0	0	#N/A
				0	0	0	0	0	0	0	0	#N/A
				0	0	0	0	0	0	0	0	#N/A
				0	0	0	0	0	0	0	0	#N/A
				0	0	0	0	0	0	0	0	#N/A
				0	0	0	0	0	0	0	0	#N/A
				0	0	0	0	0	0	0	0	#N/A
				0	0	0	0	0	0	0	0	#N/A
				0	0	0	0	0	0	0	0	#N/A
				0	0	0	0	0	0	0	0	#N/A
				0	0	0	0	0	0	0	0	#N/A
				0	0	0	0	0	0	0	0	#N/A
				0	0	0	0	0	0	0	0	#N/A
				0	0	0	0	0	0	0	0	#N/A
				0	0	0	0	0	0	0	0	#N/A
				0	0	0	0	0	0	0	0	#N/A
				0	0	0	0	0	0	0	0	#N/A
				0	0	0	0	0	0	0	0	#N/A
				0	0	0	0	0	0	0	0	#N/A
				0	0	0	0	0	0	0	0	#N/A
				0	0	0	0	0	0	0	0	#N/A
				0	0	0	0	0	0	0	0	#N/A
				0	0	0	0	0	0	0	0	#N/A
				0	0	0	0	0	0	0	0	#N/A
				0	0	0	0	0	0	0	0	#N/A
				0	0	0	0	0	0	0	0	#N/A
				0	0	0	0	0	0	0	0	#N/A
				0	0	0	0	0	0	0	0	#N/A
				0	0	0	0	0	0	0	0	#N/A
				0	0	0	0	0	0	0	0	#N/A
				0	0	0	0	0	0	0	0	#N/A
				0	0	0	0	0	0	0	0	#N/A
				0	0	0	0	0	0	0	0	#N/A
				0	0	0	0	0	0	0	0	#N/A
				0	0	0	0	0	0	0	0	#N/A
				0	0	0	0	0	0	0	0	#N/A
				0	0	0	0	0	0	0	0	#N/A
				0	0	0	0	0	0	0	0	#N/A
				0	0	0	0	0	0	0	0	#N/A
				0	0	0	0	0	0	0	0	#N/A
				0	0	0	0	0	0	0	0	#N/A
				0	0	0	0	0	0	0	0	#N/A
				0	0	0	0	0	0	0	0	#N/A
				0	0	0	0	0	0	0	0	#N/A
				0	0	0	0	0	0	0	0	#N/A
				0	0	0	0	0	0	0	0	#N/A
				0	0	0	0	0	0	0	0	#N/A
				0	0	0	0	0	0	0	0	#N/A
				0	0	0	0	0	0	0	0	#N/A
				0	0	0	0	0	0	0	0	#N/A
				0	0	0	0	0	0	0	0	#N/A
				0	0	0	0	0	0	0	0	#N/A
				0	0	0	0	0	0	0	0	#N/A
				0	0	0	0	0	0	0	0	#N/A
				0	0	0	0	0	0	0	0	#N/A
				0	0	0	0	0	0	0	0	#N/A
				0	0	0	0	0	0	0	0	#N/A
				0	0	0	0	0	0	0	0	#N/A
				0	0	0	0	0	0	0	0	#N/A
				0	0	0	0	0	0	0	0	#N/A
				0	0	0	0	0	0	0	0	#N/A
				0	0	0	0	0	0	0	0	#N/A
				0	0	0	0	0	0	0	0	#N/A
				0	0	0	0	0	0	0	0	#N/A
				0	0	0	0	0	0	0	0	#N/A
				0	0	0	0	0	0	0	0	#N/A
				0	0	0	0	0	0	0	0	#N/A
				0	0	0	0	0	0	0	0	#N/A
				0	0	0	0	0	0	0	0	#N/A
				0	0	0	0	0	0	0	0	#N/A
				0	0	0	0	0	0	0	0	#N/A
				0	0	0	0	0	0	0	0	#N/A
				0	0	0	0	0	0	0	0	#N/A
				0	0	0	0	0	0	0	0	#N/A
				0	0	0	0	0	0	0	0	#N/A
				0	0	0	0	0	0	0	0	#N/A
				0	0	0	0	0	0	0	0	#N/A
				0	0	0	0	0	0	0	0	#N/A
				0	0	0	0	0	0	0	0	#N/A
				0	0	0	0	0	0	0	0	#N/A
				0	0	0	0	0	0	0	0	#N/A
				0	0	0	0	0	0	0	0	#N/A
				0	0	0	0	0	0	0	0	#N/A
				0	0	0	0	0	0	0	0	#N/A
				0	0	0	0	0	0	0	0	#N/A
				0	0	0	0	0	0	0	0	#N/A
				0	0	0	0	0	0	0	0	#N/A
				0	0	0	0	0	0	0	0	#N/A
				0	0	0	0	0	0	0	0	#N/A
				0	0	0	0	0	0	0	0	#N/A
				0	0	0	0	0	0	0	0	#N/A
				0	0	0	0	0	0	0	0	#N/A
				0	0	0	0	0	0	0	0	#N/A
				0	0	0	0	0	0	0	0	#N/A
				0	0	0	0	0	0	0	0	#N/A
				0	0	0	0	0	0	0	0	#N/A
				0	0	0	0	0	0	0	0	#N/A
				0	0	0	0	0	0	0	0	#N/A
				0	0	0	0	0	0	0	0	#N/A
				0	0	0	0	0	0	0	0	#N/A
				0	0	0	0	0	0	0	0	#N/A
				0	0	0	0	0	0	0	0	#N/A
				0	0	0	0	0	0	0	0	#N/A
				0	0	0	0	0	0	0	0	#N/A
				0	0	0	0	0	0	0	0	#N/A
				0	0	0	0	0	0	0	0	#N/A
				0	0	0	0	0	0	0	0	#N/A
				0	0	0	0	0	0	0	0	#N/A
				0	0	0	0	0	0	0	0	#N/A
				0	0	0	0	0	0	0	0	#N/A
				0	0	0	0	0	0	0	0	#N/A
				0	0	0	0	0	0	0	0	#N/A
				0	0	0	0	0	0	0	0	#N/A
				0	0	0	0	0	0	0	0	#N/A
				0	0	0	0	0	0	0	0	#N/A
				0	0	0	0	0	0	0	0	#N/A
				0	0	0	0	0	0	0	0	#N/A
				0	0	0	0	0	0	0	0	#N/A
				0	0	0	0	0	0	0	0	#N/A
				0	0	0	0	0	0	0	0	#N/A
				0	0	0	0	0	0	0	0	#N/A
				0	0	0	0	0	0	0	0	#N/A
				0	0	0	0	0	0	0	0	#N/A
				0	0	0	0	0	0	0	0	#N/A
				0	0	0	0	0	0	0	0	#N/A
				0	0	0	0	0	0	0	0	#N/A
				0	0	0	0	0	0	0	0	#N/A
				0	0	0	0	0	0	0	0	#N/A
				0	0	0	0	0	0	0	0	#N/A
				0	0	0	0	0	0	0	0	#N/A
				0	0	0	0	0	0	0	0	#N/A
				0	0	0	0	0	0	0	0	#N/A
				0	0	0	0	0	0	0	0	#N/A
				0	0	0	0	0	0	0	0	#N/A
				0	0	0	0	0	0	0	0	#N/A
				0	0	0	0	0	0	0	0	#N/A
				0	0	0	0	0	0	0	0	#N/A
				0	0	0	0	0	0	0	0	#N/A
				0	0	0	0	0	0	0	0	#N/A
				0	0	0	0	0	0	0	0	#N/A
				0	0	0	0	0	0	0	0	#N/A
				0	0	0	0	0	0	0	0	#N/A
				0	0	0	0	0	0	0	0	#N/A
				0	0	0	0	0	0	0	0	#N/A
				0	0	0	0	0	0	0	0	#N/A
				0	0	0	0	0	0	0	0	#N/A
				0	0	0	0	0	0	0	0	#N/A
				0	0	0	0	0	0	0	0	#N/A
				0	0	0	0	0	0	0	0	#N/A
				0	0	0	0	0	0	0	0	#N/A
				0	0	0	0	0	0	0	0	#N/A
				0	0	0	0	0	0	0	0	#N/A
				0	0	0	0	0	0	0	0	#N/A
				0	0	0	0	0	0	0	0	#N/A
				0	0	0	0	0	0	0	0	#N/A
				0	0	0	0	0	0	0	0	#N/A
				0	0	0	0	0	0	0	0	#N/A
				0	0	0	0	0	0	0	0	#N/A
				0	0	0	0	0	0	0	0	#N/A
				0	0	0	0	0	0	0	0	#N/A
				0	0	0	0	0	0	0	0	#N/A
				0	0	0	0	0	0	0	0	#N/A
				0	0	0	0	0	0	0	0	#N/A
				0	0	0	0	0	0	0	0	#N/A
				0	0	0	0	0	0	0	0	#N/A
				0	0	0	0	0	0	0	0	#N/A
				0	0	0	0	0	0	0	0	#N/A
				0	0	0	0	0	0	0	0	#N/A
				0	0	0	0	0	0	0	0	#N/A
				0	0	0	0	0	0	0	0	#N/A
				0	0	0	0	0	0	0	0	#N/A
				0	0	0	0	0	0	0	0	#N/A
				0	0	0	0	0	0	0	0	#N/A
				0	0	0	0	0	0	0	0	#N/A
				0	0	0	0	0	0	0	0	#N/A
				0	0	0	0	0	0	0	0	#N/A
				0	0	0	0	0	0	0	0	#N/A
				0	0	0	0	0	0	0	0	#N/A
				0	0	0	0	0	0	0	0	#N/A
				0	0	0	0	0	0	0	0	#N/A
				0	0	0	0	0	0	0	0	#N/A
				0	0	0	0	0	0	0	0	#N/A
				0	0	0	0	0	0	0	0	#N/A
				0	0	0	0	0	0	0	0	#N/A
				0	0	0	0	0	0	0	0	#N/A
				0	0	0	0	0	0	0	0	#N/A
				0	0	0	0	0	0	0	0	#N/A
				0	0	0	0	0	0	0	0	#N/A
				0	0	0	0	0	0	0	0	#N/A
				0	0	0	0	0	0	0	0	#N/A
				0	0	0	0	0	0	0	0	#N/A
				0	0	0	0	0	0	0	0	#N/A
				0	0	0	0	0	0	0	0	#N/A
				0	0	0	0	0	0	0	0	#N/A
				0	0	0	0	0	0	0	0	#N/A
				0	0	0	0	0	0	0	0	#N/A
				0	0	0	0	0	0	0	0	#N/A
				0	0	0	0	0	0	0	0	#N/A
				0	0	0	0	0	0	0	0	#N/A
				0	0	0	0	0	0	0	0	#N/A
				0	0	0	0	0	0	0	0	#N/A
				0	0	0	0	0	0	0	0	#N/A
				0	0	0	0	0	0	0	0	#N/A
				0	0	0	0	0	0	0	0	#N/A
				0	0	0	0	0	0	0	0	#N/A
				0	0	0	0	0	0	0	0	#N/A
				0	0	0	0	0	0	0	0	#N/A
				0	0	0	0	0	0	0	0	#N/A
				0	0	0	0	0	0	0	0	#N/A
				0	0	0	0	0	0	0	0	#N/A
				0	0	0	0	0	0	0	0	#N/A
				0	0	0	0	0	0	0	0	#N/A
				0	0	0	0	0	0	0	0	#N/A
				0	0	0	0	0	0	0	0	#N/A
				0	0	0	0	0	0	0	0	#N/A
				0	0	0	0	0	0	0	0	#N/A
				0	0	0	0	0	0	0	0	#N/A
				0	0	0	0	0	0	0	0	#N/A
				0	0	0	0	0	0	0	0	#N/A
				0	0	0	0	0	0	0	0	#N/A
				0	0	0	0	0	0	0	0	#N/A
				0	0	0	0	0	0	0	0	#N/A
				0	0	0	0	0	0	0	0	#N/A
				0	0	0	0	0	0	0	0	#N/A
				0	0	0	0	0	0	0	0	#N/A
				0	0	0	0	0	0	0	0	#N/A
				0	0	0	0	0	0	0	0	#N/A
				0	0	0	0	0	0	0	0	#N/A
				0	0	0	0	0	0	0	0	#N/A
				0	0	0	0	0	0	0	0	#N/A
				0	0	0	0	0	0	0	0	#N/A
				0	0	0	0	0	0	0	0	#N/A
				0	0	0	0	0	0	0	0	#N/A
				0	0	0	0	0	0	0	0	#N/A
				0	0	0	0	0	0	0	0	#N/A
				0	0	0	0	0	0	0	0	#N/A
				0	0	0	0	0	0	0	0	#N/A
				0	0	0	0	0	0	0	0	#N/A
				0	0	0	0	0	0	0	0	#N/A
				0	0	0	0	0	0	0	0	#N/A
				0	0	0	0	0	0	0	0	#N/A
				0	0	0	0	0	0	0	0	#N/A
				0	0	0	0	0	0	0	0	#N/A
				0	0	0	0	0	0	0	0	#N/A
				0	0	0	0	0	0	0	0	#N/A
				0	0	0	0	0	0	0	0	#N/A
				0	0	0	0	0	0	0	0	#N/A
				0	0	0	0	0	0	0	0	#N/A
				0	0	0	0	0	0	0	0	#N/A
				0	0	0	0	0	0	0	0	#N/A
				0	0	0	0	0	0	0	0	#N/A
				0	0	0	0	0	0	0	0	#N/A
				0	0	0	0	0	0	0	0	#N/A
				0	0	0	0	0	0	0	0	#N/A
				0	0	0	0	0	0	0	0	#N/A
				0	0	0	0	0	0	0	0	#N/A
				0	0	0	0	0	0	0	0	#N/A
				0	0	0	0	0	0	0	0	#N/A
				0	0	0	0	0	0	0	0	#N/A
				0	0	0	0	0	0	0	0	#N/A
				0	0	0	0	0	0	0	0	#N/A
				0	0	0	0	0	0	0	0	#N/A
				0	0	0	0	0	0	0	0	#N/A
				0	0	0	0	0	0	0	0	#N/A
				0	0	0	0	0	0	0	0	#N/A
				0	0	0	0	0	0	0	0	#N/A
				0	0	0	0	0	0	0	0	#N/A
				0	0	0	0	0	0	0	0	#N/A
				0	0	0	0	0	0	0	0	#N/A
				0	0	0	0	0	0	0	0	#N/A
				0	0	0	0	0	0	0	0	#N/A
				0	0	0	0	0	0	0	0	#N/A
				0	0	0	0	0	0	0	0	#N/A
				0	0	0	0	0	0	0	0	#N/A
				0	0	0	0	0	0	0	0	#N/A
				0	0	0	0	0	0	0	0	#N/A
				0	0	0	0	0	0	0	0	#N/A
				0	0	0	0	0	0	0	0	#N/A
				0	0	0	0	0	0	0	0	#N/A
				0	0	0	0	0	0	0	0	#N/A
				0	0	0	0	0	0	0	0	#N/A
				0	0	0	0	0	0	0	0	#N/A
				0	0	0	0	0	0	0	0	#N/A
				0	0	0	0	0	0	0	0	#N/A
				0	0	0	0	0	0	0	0	#N/A
				0	0	0	0	0	0	0	0	#N/A
				0	0	0	0	0	0	0	0	#N/A
				0	0	0	0	0	0	0	0	#N/A
				0	0	0	0	0	0	0	0	#N/A
				0	0	0	0	0	0	0	0	#N/A
				0	0	0	0	0	0	0	0	#N/A
				0	0	0	0	0	0	0	0	#N/A
				0	0	0	0	0	0	0	0	#N/A
				0	0	0	0	0	0	0	0	#N/A
				0	0	0	0	0	0	0	0	#N/A
				0	0	0	0	0	0	0	0	#N/A
				0	0	0	0	0	0	0	0	#N/A
				0	0	0	0	0	0	0	0	#N/A
				0	0	0	0	0	0	0	0	#N/A
[truncated: 36,405 more rows]
